# Supplementary material for: Metabologenomic assessment of biosynthetic capabilities in the genus Salinibacterium: untapped bioactive chemistry produced by marine strain AL4.1 isolated in the Chilean Patagonia
Source: Research Square preprint supplement (doi:10.21203/rs.3.rs-8562886/v1), 2026-02-02
Supplement: Supplementary file 2 [file 995f8981fdb1280bc98c8337.xlsx]

## Sheet: Table S1
Table 1. Antimicrobial activity of crude extracts from Salinibacterium sp. AL4.1 cultures against model microbial strains: Staphylococcus aureus NBRC 100910T (STAU); Listeria monocytogenes 07PF0776 (LIMO); Salmonella enterica subsp. enterica LT2T (SAEN); Escherichia coli FAP1 (ESCO), Candida albicans ATCC 9028 (CAAL) and Candida tropicalis ATCC 750 (CATR)
	ESCO			SAEN			STAU			LIMO			CAAL			CATR
Medium/Day	2	5	8	2	5	8	2	5	8	2	5	8	2	5	8	2	5	8
ISP2	-	-	-	-	-	-	+	-	-	-	-	-	-	-	-	-	-	-
R5A	-	+/-	-	-	-	-	-	+	-	-	-	-	-	-	-	-	-	-

## Sheet: Table S2
Table S2 FBMN-derived feature annotations
id	mz	rt	rt_min	charge	library_compound_name
6264	474.255	9.44	9.44	0
14218	759.222	14.88	14.88	0
12521	474.321	12.97	12.97	0
9733	443.334	11.14	11.14	0
9745	399.308	11.14	11.14	0
19555	955.756	19.92	19.92	0
11959	474.321	12.53	12.53	0	Fenobucarb
14153	977.681	14.74	14.74	0
6620	377.209	9.67	9.67	0
6475	373.35	9.59	9.59	0	STROBILACTONE A
3912	292.275	7.67	7.67	0	Carpachromene
8549	895.715	10.54	10.54	0	202821-81-6
4551	327.008	8.28	8.28	0
19641	687.442	20.1	20.1	0
18350	970.739	19.13	19.13	0
5486	415.107	8.88	8.88	0
12209	703.213	12.73	12.73	0
4183	291.065	7.96	7.96	0	Carpachromene
6024	327.381	9.27	9.27	0
21444	872.772	20.79	20.79	0	TG(15:0/18:2/18:2); [M+NH4]+ C54H100N1O6
10470	517.37	11.56	11.56	0
12213	704.211	12.73	12.73	0
19874	1569.2	20.18	20.18	0
13638	419.315	14.12	14.12	0	NCGC00385548-01
22727	380.134	21.22	21.22	0	3_phenyllactic_acid
8081	759.573	10.35	10.35	0	PC(O-18:1/16:0); [M+H]+ C42H85N1O7P1
8978	872.77	10.76	10.76	0	TG(14:1/14:1/18:2); [M+NH4]+ C49H90N1O6
6687	509.284	9.71	9.71	0
18593	956.687	19.26	19.26	0
12279	944.704	12.8	12.8	0
12060	541.538	12.62	12.62	0	asperuloside
20707	1348.88	20.52	20.52	0
16301	937.752	17.17	17.17	0
985	309.092	3.21	3.21	0
21701	947.731	20.91	20.91	0
19125	877.726	19.72	19.72	0
11218	833.241	12.01	12.01	0	(3S,4R,6aR,6bS,8aS,11R,12R,14bR)-3,12-dihydroxy-4,6a,6b,11,12,14b-hexamethyl-8a-[3,4,5-trihydroxy-6-(hydroxymethyl)oxan-2-yl]oxycarbonyl-1,2,3,4a,5,6,7,8,9,10,11,12a,14,14a-tetradecahydropicene-4-carboxylic acid
19901	722.508	20.18	20.18	0
15922	537.166	16.84	16.84	0	3,4-di-O-galloylquinic acid
6087	599.116	9.33	9.33	0
19406	942.778	19.87	19.87	0
15267	908.258	16.08	16.08	0
3812	498.238	7.5	7.5	0
2750	417.043	7.17	7.17	0	5_methoxy_indole_acetic_acid
2268	456.192	7.02	7.02	0
22555	305.303	21.17	21.17	0	Spectral Match to Benzyldodecyldimethylammonium from NIST14
20911	941.774	20.64	20.64	0
2514	282.112	7.07	7.07	0	[4-[3,4,5-trihydroxy-6-(hydroxymethyl)oxan-2-yl]oxyphenyl]methyl 2,3-dihydroxy-2-[(4-hydroxyphenyl)methyl]butanoate
20986	1348.88	20.64	20.64	0
17262	999.692	18.27	18.27	0
11573	487.118	12.27	12.27	0
18268	918.812	19.02	19.02	0
4514	503.282	8.25	8.25	0
16729	519.138	17.76	17.76	0
6597	384.284	9.66	9.66	0	Spectral Match to p-tert-Octylphenol tetraglycol ether from NIST14
3473	932.628	7.34	7.34	0	"((R)-4-((3R,5S,7S,8R,9S,10S,12S,13R,14S,17R)-3,7,12-trihydroxy-10,13-dimethylhexadecahydro-1H-cyclopenta[a]phenanthren-17-yl)pentanoyl)glycine"
8571	675.412	10.57	10.57	0
23079	668.655	21.32	21.32	0
18737	978.76	19.46	19.46	0
8000	832.739	10.33	10.33	0	TG(18:2/18:2/18:2); [M+NH4]+ C57H102N1O6
8247	431.086	10.44	10.44	0	(1S,3R,6R,7S,8S,10R,13S,16S,17R)-8-tert-butyl-6,17-dihydroxy-16-methyl-2,4,14,19-tetraoxahexacyclo[8.7.2.0 , .0 ,?.0?, .0 , ?]nonadecane-5,15,18-trione
13960	906.259	14.52	14.52	0
21338	785.546	20.8	20.8	0
17692	625.632	18.61	18.61	0
7306	402.394	10	10	0
17618	1019.69	18.55	18.55	0
9524	679.43	11.02	11.02	0
6956	718.535	9.84	9.84	0
6456	621.441	9.58	9.58	0	Spectral Match to p-tert-Octylphenol nonaglycol ether from NIST14
1960	296.139	6.71	6.71	0	Massbank:EA277006 Aspartame|3-amino-4-[(1-benzyl-2-keto-2-methoxy-ethyl)amino]-4-keto-butyric acid
12653	990.723	13.1	13.1	0	202821-81-6
22543	446.888	21.16	21.16	0
17397	956.687	18.47	18.47	0
22633	702.413	21.2	21.2	0	Sodium Formate
9172	708.513	10.85	10.85	0
22836	785.544	21.21	21.21	0
8918	737.509	10.71	10.71	0
10407	399.366	11.49	11.49	0
5962	659.115	9.22	9.22	0
13869	339.345	14.33	14.33	0
15317	981.699	16.25	16.25	0
7722	772.586	10.12	10.12	0	SM(d18:2/18:1); [M+H]+ C41H80N2O6P1
19804	1345.93	20.17	20.17	0
4006	258.243	7.79	7.79	0
4374	348.069	8.13	8.13	0
5963	733.556	9.26	9.26	0
257	215.139	2.08	2.08	0
11903	414.269	12.49	12.49	0	N-{3-[CYCLOHEXYL(METHYL)AMINO]PROPYL}-6-OXO-5H,6H,6AH,7H,8H,9H,10H-PYRIDO[1,2-A]QUINOXALINE-3-CARBOXAMIDE
5341	570.385	8.79	8.79	0
8241	441.33	10.44	10.44	0
17744	858.755	18.67	18.67	0
21628	931.768	20.91	20.91	0	202821-81-6
7352	630.478	10.03	10.03	0
14293	689.157	14.84	14.84	0
21023	1133.27	20.72	20.72	0
16070	839.711	17.04	17.04	0
22310	750.794	21.1	21.1	0
22604	298.347	21.18	21.18	0	[(1R,5R,9S,13S)-5,9,13-trimethyltetracyclo[11.2.1.0 , ?.0?,?]hexadec-14-en-5-yl]methanol
7324	760.583	10.01	10.01	0	PC(16:0/16:1); [M+H]+ C40H79N1O8P1
12961	474.321	13.39	13.39	0
11962	285.298	12.54	12.54	0	Toxoflavin
17951	955.754	18.78	18.78	0
22896	305.157	21.22	21.22	0
23370	451.156	21.5	21.5	0
9522	708.512	11.01	11.01	0
18493	970.739	19.28	19.28	0
6107	600.119	9.33	9.33	0	Massbank: Dixyrazine|2-(2-{4-[2-Methyl-3-(10H-phenothiazin-10-yl)propyl]piperazin-1-yl}ethoxy)ethan-1-ol
3754	512.124	7.49	7.49	0
12135	1007.72	12.66	12.66	0	202821-81-6
9675	372.101	11.1	11.1	0	Spectral Match to Cyclopentasiloxane, decamethyl- from NIST14
7932	644.348	10.28	10.28	0
5853	450.358	9.16	9.16	0
13312	998.697	13.79	13.79	0
15815	906.756	16.79	16.79	0
7308	604.538	10.02	10.02	0	Spectral Match to cis,cis-9,12-Octadecadien-1-ol from NIST14
5095	813.204	8.67	8.67	0
18722	956.687	19.36	19.36	0
1961	261.102	6.71	6.71	0	Spectral Match to Val-Phe from NIST14
15147	906.259	15.86	15.86	0
11937	496.303	12.53	12.53	0
19331	832.739	19.83	19.83	0
2365	290.269	7.02	7.02	0
15232	976.743	16.04	16.04	0
11205	901.799	11.96	11.96	0
22307	708.513	21.09	21.09	0
22449	853.669	21.14	21.14	0
13777	897.752	14.26	14.26	0
7354	798.602	10.02	10.02	0
16074	897.752	17.02	17.02	0
20694	931.767	20.59	20.59	0
23120	772.587	21.34	21.34	0	SM(d18:2/18:1); [M+H]+ C41H80N2O6P1
16285	978.76	17.25	17.25	0
1485	702.497	5.88	5.88	0
17795	1763.51	18.72	18.72	0
5991	294.17	9.24	9.24	0
4077	303.084	7.85	7.85	0
4385	454.301	8.14	8.14	0
4255	388.183	8.04	8.04	0
6106	616.093	9.33	9.33	0
9948	523.439	11.25	11.25	0
5717	669.454	9.09	9.09	0	albubactin A
20872	1737.5	20.64	20.64	0
7781	273.097	10.22	10.22	0	Massbank:LU052303 Acetyl tributyl citrate|tributyl 2-acetyloxypropane-1,2,3-tricarboxylate
4099	245.038	7.87	7.87	0	Massbank:AU265306 Propyphenazone|1,5-dimethyl-2-phenyl-4-propan-2-ylpyrazol-3-one
6577	450.291	9.65	9.65	0
20792	711.493	20.66	20.66	0
22359	1032.77	21.1	21.1	0
14224	611.423	14.76	14.76	0	(E)-3-hydroxy-6-(4-hydroxy-6-methoxy-7-methyl-3-oxo-1H-2-benzofuran-5-yl)-4-methylhex-4-enoic acid
4790	234.185	8.46	8.46	0	Z1510955638
7806	259.154	10.22	10.22	0	Spectral Match to Dibutyl phthalate from NIST14
13780	923.768	14.27	14.27	0
10299	416.191	11.48	11.48	0	4-(3,4-dihydroxyphenyl)-7-hydroxy-5-[(2S,3R,4S,5S,6R)-3,4,5-trihydroxy-6-(hydroxymethyl)oxan-2-yl]oxychromen-2-one
15869	504.108	16.79	16.79	0
3414	698.927	7.3	7.3	0
3944	388.154	7.71	7.71	0	Ipecoside
19009	625.632	19.61	19.61	0
8300	820.6	10.46	10.46	0
7744	448.414	10.2	10.2	0	(E)-3-hydroxy-6-(4-hydroxy-6-methoxy-7-methyl-3-oxo-1H-2-benzofuran-5-yl)-4-methylhex-4-enoic acid
22644	918.813	21.22	21.22	0	TG(17:1/18:1/18:1); [M+NH4]+ C56H106N1O6
8731	408.368	10.65	10.65	0	3-hydroxyhexadecanoyl glutamic acid [M+Na]+
22737	582.863	21.16	21.16	0
3453	413.288	7.34	7.34	0	Glycocholic Acid
8570	708.513	10.57	10.57	0
18450	965.783	19.17	19.17	0
12550	927.725	13	13	0
21883	420.345	20.97	20.97	0
4336	661.152	8.11	8.11	0
4874	331.201	8.54	8.54	0	Massbank:PR304070 Indole-3-acetyl-L-valine
18090	897.752	18.89	18.89	0
11865	833.241	12.47	12.47	0	(3S,4R,6aR,6bS,8aS,11R,12R,14bR)-3,12-dihydroxy-4,6a,6b,11,12,14b-hexamethyl-8a-[3,4,5-trihydroxy-6-(hydroxymethyl)oxan-2-yl]oxycarbonyl-1,2,3,4a,5,6,7,8,9,10,11,12a,14,14a-tetradecahydropicene-4-carboxylic acid
15702	1019.69	16.72	16.72	0
6050	418.107	9.29	9.29	0
5788	284.185	9.12	9.12	0	[8-[2-(3-methylbutanoyloxy)propan-2-yl]-2-oxo-8,9-dihydrofuro[2,3-h]chromen-9-yl] (Z)-2-methylbut-2-enoate
18093	1448.37	18.94	18.94	0
5364	375.366	8.81	8.81	0
18672	955.755	19.38	19.38	0
13531	419.315	13.99	13.99	0
7558	687.495	10.14	10.14	0	Ginsenoside Rf
19595	1002.79	20.02	20.02	0	Massbank:RP005402 Glycodeoxycholic acid|2-[[(4R)-4-[(3R,8R,9S,10S,12S,13R,14S,17R)-3,12-dihydroxy-10,13-dimethyl-2,3,4,5,6,7,8,9,11,12,14,15,16,17-tetradecahydro-1H-cyclopenta[a]phenanthren-17-yl]pentanoyl]amino]acetic
6834	301.216	9.76	9.76	0
8963	906.75	10.75	10.75	0
13396	1020.77	13.86	13.86	0
18237	934.805	18.99	18.99	0
8710	419.332	10.64	10.64	0
143	328.233	1.92	1.92	0	Spectral Match to Undecaethylene glycol from NIST14
20355	1348.88	20.41	20.41	0
12902	1084.78	13.38	13.38	0
21839	615.14	20.93	20.93	0	3-cyclopentyl-7-[2-(naphthalen-2-yl)cyclopropanecarbonyl]-5H,6H,7H,8H-[1,2,4]triazolo[4,3-a]pyrazine
23050	596.598	21.31	21.31	0	methyl 2-[(3-ethoxy-4-propoxyphenyl)methylene]-3-oxobenzo[b]furan-5-carboxylat e CollisionEnergy:102040
10030	399.21	11.28	11.28	0
22427	784.545	21.1	21.1	0
4949	850.402	8.59	8.59	0
13583	832.241	14.1	14.1	0
22362	702.865	21.1	21.1	0	MS_Contaminant_Sodium_Formate_Cluster
18007	984.718	18.81	18.81	0
19214	916.671	19.78	19.78	0
21644	375.25	20.89	20.89	0
22800	786.827	21.16	21.16	0
4674	442.124	8.36	8.36	0
4464	615.335	8.2	8.2	0
3769	253.097	7.49	7.49	0	CNP0246456
3980	230.046	7.76	7.76	0	Candidate Tryptamine-C2:0 (delta mass:42.0106)
22323	1236.74	21.1	21.1	0
21368	895.739	20.79	20.79	0
4798	364.321	8.46	8.46	0
17135	1763.51	18.19	18.19	0
21832	473.215	20.98	20.98	0	Febuxostat
21879	971.732	20.95	20.95	0
20321	879.737	20.47	20.47	0
4087	489.267	7.86	7.86	0
7537	707.355	10.12	10.12	0
22696	701.41	21.2	21.2	0
17983	668.654	18.75	18.75	0
5338	331.34	8.79	8.79	0
4526	237.112	8.26	8.26	0	1-(4-methyl-1,3-thiazol-2-yl)piperidine-3-carboxylic acid
14111	339.345	14.62	14.62	0
22327	488.873	21.1	21.1	0	2R,3S,4S,5R,6S)-2-[[(2R,3R,4R)-3,4-dihydroxy-4-(hydroxymethyl)oxolan-2-yl]oxymethyl]-6-[4-hydroxy-3-(3-methylbut-2-enyl)phenoxy]oxane-3,4,5-triol
18309	967.79	19.05	19.05	0	iohexol
22634	703.414	21.2	21.2	0	MS_Contaminant_Sodium_Formate_Cluster
14950	970.739	15.54	15.54	0
18127	895.738	18.91	18.91	0
8723	407.336	10.65	10.65	0	3-hydroxyhexadecanoyl glutamic acid [M+Na]+
4698	392.091	8.37	8.37	0
10077	872.77	11.37	11.37	0	TG(14:1/14:1/18:2); [M+NH4]+ C49H90N1O6
20923	839.71	20.64	20.64	0
8669	737.396	10.63	10.63	0
9190	932.789	10.84	10.84	0
2155	390.181	6.9	6.9	0
2176	343.064	6.91	6.91	0
11506	832.241	12.22	12.22	0
14597	637.966	15.2	15.2	0
7297	340.358	10.02	10.02	0	Candidate Threonine/homoserine-C7:0 (delta mass:112.0897)
21002	915.602	20.68	20.68	0
7925	328.284	10.29	10.29	0	geranic_acid
9286	962.836	10.91	10.91	0
7919	221.153	10.28	10.28	0	"7,8,2'-Trihydroxyflavone CollisionEnergy:102040"
8178	380.352	10.43	10.43	0
23038	881.701	21.3	21.3	0	PC(18:0/22:5); [M+H]+ C48H87N1O8P1
19810	708.511	20.18	20.18	0
8269	339.345	10.44	10.44	0
15865	597.601	16.83	16.83	0
21555	420.345	20.91	20.91	0
8396	603.534	10.47	10.47	0
16238	942.708	17.16	17.16	0
23054	314.342	21.39	21.39	0
14985	927.725	15.62	15.62	0
15616	541.158	16.56	16.56	0
5632	682.345	9	9	0
12341	518.375	12.82	12.82	0
19171	1733.46	19.73	19.73	0
3560	437.185	7.4	7.4	0
14084	606.468	14.65	14.65	0	(2R,6R)-6-[(3R,10S,12S,13R,17R)-3-(2-carboxyacetyl)oxy-12-hydroxy-4,4,10,13,14-pentamethyl-2,3,5,6,7,11,12,15,16,17-decahydro-1H-cyclopenta[a]phenanthren-17-yl]-2-methyl-3-methylideneheptanoic acid
23235	358.368	21.39	21.39	0
1789	284.118	6.53	6.53	0
1433	248.059	5.39	5.39	0	cyclo-(Val-Phe)
5706	691.437	9.05	9.05	0
3243	626.957	7.29	7.29	0
23126	886.788	21.32	21.32	0	TG(18:2/18:2/18:3); [M+NH4]+ C57H100N1O6
13617	1028.71	14.11	14.11	0
4113	269.092	7.88	7.88	0
6688	522.415	9.72	9.72	0	Massbank:PR310643 Speciosine
7565	978.244	10.13	10.13	0
9721	723.416	11.12	11.12	0
14402	977.681	14.91	14.91	0
4140	411.169	7.96	7.96	0
19207	1130.31	19.74	19.74	0
5807	328.191	9.14	9.14	0
4114	338.245	7.88	7.88	0
13420	1014.67	13.9	13.9	0
19109	979.763	19.67	19.67	0	202821-81-6
9818	699.419	11.17	11.17	0	[(2R,3S,4S,5R,6R)-6-[1,7-bis(3,4-dihydroxyphenyl)-5-oxoheptan-3-yl]oxy-3,4,5-trihydroxyoxan-2-yl]methyl (E)-3-(3,4-dimethoxyphenyl)prop-2-enoate
13622	441.297	14.11	14.11	0	13-Hydroxylupanine_CE15
21988	895.717	20.99	20.99	0
19564	885.715	19.95	19.95	0
21821	915.602	20.9	20.9	0
13027	420.318	13.45	13.45	0
9713	745.489	11.11	11.11	0
22107	879.74	21.04	21.04	0
6247	246.111	9.44	9.44	0
7810	213.076	10.22	10.22	0	129-56-6
16032	957.679	17.05	17.05	0
6489	559.384	9.61	9.61	0	Spectral Match to p-tert-Octylphenol heptaglycol ether from NIST14
11256	905.696	12.01	12.01	0
10897	629.195	11.82	11.82	0
3392	272.258	7.31	7.31	0	2-METHYLMALEATE
17883	907.765	18.74	18.74	0
6097	579.14	9.33	9.33	0
18255	956.687	19.03	19.03	0
20750	708.511	20.5	20.5	0
18691	970.739	19.36	19.36	0
325	453.209	2.16	2.16	0
18925	955.756	19.58	19.58	0
20511	793.61	20.44	20.44	0	N,N-bis(1H-indol-4-ylmethyl)butanamide
15743	597.601	16.67	16.67	0	941001-68-9
8205	711.493	10.43	10.43	0
393	433.283	2.2	2.2	0	Spectral Match to Undecaethylene glycol from NIST14
6493	361.366	9.6	9.6	0
4266	689.349	8.04	8.04	0
9048	300.289	10.8	10.8	0	Ala-C16:0
13677	998.697	14.17	14.17	0
6724	271.242	9.72	9.72	0
19915	1348.88	20.17	20.17	0	2098836-54-3
6154	399.366	9.35	9.35	0	1-[2-(1H-benzimidazol-2-yl)piperidin-1-yl]-3-(1H-indol-1-yl)propan-1-one
13064	1006.72	13.5	13.5	0
14560	597.601	15.14	15.14	0	Z998574470
1377	211.123	4.62	4.62	0	ReSpect:PM014413 Cyclo(Pro-Phe)
19354	1737.5	19.85	19.85	0
6159	857.515	9.35	9.35	0
3306	633.391	7.3	7.3	0
23111	604.539	21.34	21.34	0
13817	305.157	14.27	14.27	0	1338937-12-4
7786	599.503	10.22	10.22	0	Massbank: Dixyrazine|2-(2-{4-[2-Methyl-3-(10H-phenothiazin-10-yl)propyl]piperazin-1-yl}ethoxy)ethan-1-ol
19589	1567.19	20.03	20.03	0
6116	786.602	9.34	9.34	0
269	389.257	2.07	2.07	0	Spectral Match to Undecaethylene glycol from NIST14
5099	609.275	8.67	8.67	0
11754	420.344	12.35	12.35	0	Kynurenine
8190	252.09	10.42	10.42	0	4-(3,4-dihydroxyphenyl)-7-hydroxy-5-[(2S,3R,4S,5S,6R)-3,4,5-trihydroxy-6-(hydroxymethyl)oxan-2-yl]oxychromen-2-one
6197	451.207	9.4	9.4	0	NCGC00384692-01_C32H42O17_beta-D-Glucopyranoside, 6-[[6-deoxy-3-O-[(2E)-3-(3,4-dimethoxyphenyl)-1-oxo-2-propen-1-yl]-alpha-L-mannopyranosyl]oxy]-1a,1b,2,5a,6,6a-hexahydro-1a-(hydroxymethyl)oxireno[4,5]cyclopenta[1,2-c]pyran-2-yl
5268	302.08	8.74	8.74	0
8701	398.352	10.64	10.64	0	aminoadipic acid-C18:1
9449	903.812	10.95	10.95	0	TG(18:1/18:1/18:1); [M+NH4]+ C57H108N1O6
21494	418.329	20.91	20.91	0	AKOS027472133
19754	1540.17	20.15	20.15	0
10372	923.767	11.55	11.55	0
12776	1012.68	13.2	13.2	0	202821-81-6
3294	620.668	7.29	7.29	0
19020	1002.79	19.61	19.61	0
4743	361.233	8.42	8.42	0
21614	277.176	20.9	20.9	0	Z1131295222
13967	907.26	14.53	14.53	0
21121	771.524	20.72	20.72	0
3887	275.277	7.57	7.57	0	METHYL STEARATE
17427	1444.4	18.45	18.45	0
7892	507.368	10.28	10.28	0
5582	759.572	8.95	8.95	0
4648	487.317	8.33	8.33	0
4242	558.421	8.03	8.03	0	473727-83-2
7904	485.356	10.28	10.28	0
6110	338.045	9.33	9.33	0
22578	920.719	21.2	21.2	0
15969	519.138	16.93	16.93	0
3465	948.651	7.34	7.34	0
8734	877.725	10.66	10.66	0
6290	733.557	9.43	9.43	0
15316	664.509	16.19	16.19	0
18240	1129.32	19.02	19.02	0
4329	622.163	8.11	8.11	0
1406	244.091	5.24	5.24	0	cyclo(L-Phe-D-Pro)
20692	908.765	20.6	20.6	0
4836	408.122	8.49	8.49	0
21982	879.738	21.02	21.02	0
19791	1566.19	20.14	20.14	0
14944	597.601	15.56	15.56	0
22238	302.145	21.09	21.09	0	[(1R,5R,9S,13S)-5,9,13-trimethyltetracyclo[11.2.1.0 , ?.0?,?]hexadec-14-en-5-yl]methanol
19219	625.632	19.76	19.76	0
19584	611.184	19.92	19.92	0	(E)-3-hydroxy-6-(4-hydroxy-6-methoxy-7-methyl-3-oxo-1H-2-benzofuran-5-yl)-4-methylhex-4-enoic acid
8763	342.269	10.67	10.67	0	amyl_2_furoate
7460	342.373	10.08	10.08	0
21138	1733.46	20.77	20.77	0
4827	462.275	8.5	8.5	0	Isovitexin
4523	293.174	8.26	8.26	0	AE-406/41056408
4121	343.295	7.89	7.89	0
17793	1737.5	18.69	18.69	0
18923	1371.38	19.55	19.55	0
85	476.149	1.83	1.83	0
4749	203.179	8.42	8.42	0	Spectral Match to Bolasterone from NIST14
20978	283.175	20.67	20.67	0
19489	839.71	19.88	19.88	0
14023	1194.9	14.62	14.62	0
1788	285.122	6.53	6.53	0
5658	732.553	9	9	0
7486	635.456	10.09	10.09	0
14064	993.742	14.63	14.63	0
18789	942.708	19.44	19.44	0
19285	853.723	19.81	19.81	0
19905	686.438	20.17	20.17	0
7414	703.453	10.05	10.05	0
8002	916.796	10.39	10.39	0
21820	905.752	20.93	20.93	0
9019	703.407	10.78	10.78	0	[(2R,3S,4S,5R,6R)-6-[1,7-bis(3,4-dihydroxyphenyl)-5-oxoheptan-3-yl]oxy-3,4,5-trihydroxyoxan-2-yl]methyl (E)-3-(3,4-dimethoxyphenyl)prop-2-enoate
18763	985.718	19.42	19.42	0
6621	362.238	9.67	9.67	0	5_methoxy_tryptophol
14514	689.157	14.99	14.99	0
4346	263.147	8.11	8.11	0	Eleutheroside B
13325	993.742	13.82	13.82	0
8785	297.24	10.68	10.68	0	14-deoxy-11,12-dihydroandrographolide
20893	350.187	20.69	20.69	0	isobutyl_hexanoate
6904	295.226	9.79	9.79	0	IMIQUIMOD
3366	207.101	7.3	7.3	0	NCGC00380083-01!(E)-3-[2,4-dihydroxy-5-(2-methylbut-3-en-2-yl)phenyl]-1-(4-methoxyphenyl)prop-2-en-1-one
13475	420.344	13.95	13.95	0
10105	468.477	11.36	11.36	0
4527	376.083	8.26	8.26	0
15987	504.108	16.95	16.95	0
19296	907.766	19.8	19.8	0
6108	772.586	9.34	9.34	0
621	481.261	2.42	2.42	0
8784	893.699	10.72	10.72	0
7488	617.426	10.09	10.09	0
14764	597.601	15.36	15.36	0	Z998574470
13478	1034.67	13.95	13.95	0
8773	637.304	10.68	10.68	0	Cratoxyarborenone E
22377	903.743	21.09	21.09	0
21768	893.701	21	21	0	PC(19:0/22:6); [M+H]+ C49H87N1O8P1
13611	1142.82	14.09	14.09	0	202821-81-6
19061	921.752	19.65	19.65	0
8248	430.089	10.44	10.44	0
13557	993.742	14.03	14.03	0
7019	325.253	9.87	9.87	0
8513	645.497	10.55	10.55	0	Spectral Match to Undecaethylene glycol from NIST14
4781	846.471	8.44	8.44	0
6085	337.544	9.33	9.33	0
9998	686.438	11.28	11.28	0	202821-81-6
20371	923.767	20.45	20.45	0
12441	1012.68	12.92	12.92	0
8146	709.477	10.41	10.41	0
22504	350.187	21.13	21.13	0	isobutyl_hexanoate
4839	461.272	8.5	8.5	0	benzthiazide
7272	786.602	9.99	9.99	0	Spectral Match to Arachidonoylthio-PC from NIST14
6132	732.553	9.33	9.33	0
9798	901.8	11.17	11.17	0
7370	591.534	10.03	10.03	0
10085	818.704	11.35	11.35	0
9804	872.77	11.16	11.16	0	TG(18:2/18:2/19:0); [M+NH4]+ C58H108N1O6
8708	875.782	10.64	10.64	0
7844	542.342	10.24	10.24	0
9514	702.536	11.01	11.01	0
6799	325.253	9.75	9.75	0
8868	932.789	10.75	10.75	0
3900	231.251	7.61	7.61	0
18378	984.718	19.11	19.11	0
14690	1033.67	15.24	15.24	0
13732	1034.67	14.26	14.26	0
18435	879.738	19.14	19.14	0
13970	468.102	14.51	14.51	0	(2R,2'S,4'aS,5'R,5''S,6'R,8'aS)-2'-(acetyloxy)-5''-(furan-3-yl)-6'-methyl-2'',8'-dioxo-octahydrodispiro[oxirane-2,1'-naphthalene-5',3''-oxolane]-8'a-ylmethyl acetate
7332	642.342	10.02	10.02	0
8906	708.513	10.75	10.75	0
22721	903.742	21.18	21.18	0
17259	965.783	18.33	18.33	0
3934	292.096	7.71	7.71	0	Carpachromene
4501	415.211	8.24	8.24	0
13005	832.241	13.39	13.39	0
6093	917.301	9.33	9.33	0
8312	875.78	10.49	10.49	0
20164	877.725	20.42	20.42	0
9309	387.31	10.92	10.92	0
4231	433.317	8.01	8.01	0
9728	487.36	11.12	11.12	0
12103	832.241	12.67	12.67	0
1583	533.341	6.2	6.2	0
10362	584.473	11.55	11.55	0
7532	573.4	10.11	10.11	0
11982	969.615	12.53	12.53	0
8090	699.372	10.36	10.36	0
18852	955.756	19.48	19.48	0
14216	761.22	14.86	14.86	0
6420	468.376	9.54	9.54	0
22834	708.513	21.19	21.19	0
17329	668.654	18.35	18.35	0
18199	1447.4	19	19	0
120	229.064	1.89	1.89	0	Massbank:KO000641 3,4-Dihydroxymandelate|3,4-Dihydroxymandelic acid|Dihydroxymandelic acid|DL-3,4-Dihydroxymandelic acid
15827	965.783	16.8	16.8	0
6586	472.363	9.66	9.66	0	Spectral Match to p-tert-Octylphenol heptaglycol ether from NIST14
18159	1759.48	18.91	18.91	0
8093	703.324	10.36	10.36	0
18735	885.715	19.42	19.42	0
11740	1028.65	12.37	12.37	0
19552	1447.4	19.93	19.93	0
13243	1028.71	13.56	13.56	0
3440	414.291	7.34	7.34	0	Rhodojaponin III
4533	395.175	8.27	8.27	0
16278	696.008	17.2	17.2	0
22233	420.345	21.07	21.07	0
7792	395.366	10.2	10.2	0
16809	660.592	17.82	17.82	0
4064	240.138	7.83	7.83	0	Candidate 2-phenethylamine-C9:4 (delta mass:132.0576)
539	280.026	2.39	2.39	0
11687	686.438	12.35	12.35	0	202821-81-6
10831	685.435	11.77	11.77	0
18422	625.632	19.12	19.12	0
18533	942.778	19.24	19.24	0
16167	504.108	17.11	17.11	0
3063	662.238	7.27	7.27	0
4364	312.225	8.13	8.13	0
1084	360.103	3.29	3.29	0
15509	942.708	16.39	16.39	0
20407	1343.93	20.4	20.4	0
8106	733.556	10.38	10.38	0
20057	915.601	20.31	20.31	0
4016	359.196	7.8	7.8	0
15595	416.037	16.56	16.56	0
18300	894.651	19.04	19.04	0	202821-81-6
4786	467.074	8.46	8.46	0
9486	1759.48	11	11	0
18708	1447.36	19.36	19.36	0	202821-81-6
10799	420.344	11.77	11.77	0	N-{4-[4-(acetylamino)-3-aminophenoxy]-2-aminophenyl}acetamide
6713	290.256	9.72	9.72	0
15617	537.165	16.56	16.56	0
20966	921.753	20.66	20.66	0
1126	246.131	3.38	3.38	0	cyclo(L-Phe-D-Pro)
13634	568.566	14.1	14.1	0
4489	660.364	8.23	8.23	0
8282	578.522	10.46	10.46	0
18271	1442.4	19.01	19.01	0
21472	851.711	20.85	20.85	0
3716	406.212	7.47	7.47	0
13541	998.696	14.02	14.02	0
11685	927.725	12.35	12.35	0
4858	305.303	8.51	8.51	0	Spectral Match to Benzyldodecyldimethylammonium from NIST14
11021	717.458	11.88	11.88	0
8066	419.315	10.37	10.37	0
16535	696.008	17.47	17.47	0
19631	910.646	20.04	20.04	0
20229	1343.93	20.34	20.34	0	3-[(2S,3R,4S,5R,6R)-6-[[(2R,3R,4R,5S,6S)-3,5-dihydroxy-6-methyl-4-[(2S,3R,4R,5R,6S)-3,4,5-trihydroxy-6-methyloxan-2-yl]oxyoxan-2-yl]oxymethyl]-3,4,5-trihydroxyoxan-2-yl]oxy-5,7-dihydroxy-2-(4-hydroxyphenyl)chromen-4-one
6639	395.276	9.68	9.68	0	Candidate Serine-C11:1 (delta mass:166.1368)
1426	411.159	5.37	5.37	0
884	311.068	3.03	3.03	0	2,2-dimethyl-5-oxo-2,3,4,5-tetrahydroindeno[1,2-b]pyran-6-carboxylic acid
13404	995.748	13.87	13.87	0
3918	291.272	7.67	7.67	0	Carpachromene
12374	474.321	12.85	12.85	0
23242	711.494	21.34	21.34	0
20165	903.74	20.44	20.44	0
7909	663.271	10.26	10.26	0
18728	921.751	19.41	19.41	0
10040	475.316	11.31	11.31	0
10249	431.383	11.44	11.44	0	Z2000659805
11141	646.488	11.93	11.93	0
5289	371.327	8.76	8.76	0	578-74-5
2815	309.196	7.2	7.2	0
23349	293.885	21.49	21.49	0
1003	476.328	3.16	3.16	0
15610	520.139	16.56	16.56	0
2889	231.113	7.24	7.24	0
10938	407.221	11.83	11.83	0
16071	865.725	17.08	17.08	0
10797	680.558	11.76	11.76	0
86	511.165	1.84	1.84	0	2R,3S,4S,5R,6S)-2-[[(2R,3R,4R)-3,4-dihydroxy-4-(hydroxymethyl)oxolan-2-yl]oxymethyl]-6-[4-hydroxy-3-(3-methylbut-2-enyl)phenoxy]oxane-3,4,5-triol
4203	268.097	7.97	7.97	0	NCGC00380407-01!3,7,8-trihydroxy-3-methyl-1,4-dihydropyrano[4,3-b]chromen-10-one
23015	625.633	21.3	21.3	0
4129	596.254	7.91	7.91	0
3455	431.298	7.34	7.34	0	Glycocholic Acid
8801	908.79	10.73	10.73	0
22556	708.513	21.13	21.13	0	3-[(2S,3R,4S,5R,6R)-6-[[(2R,3R,4R,5S,6S)-3,5-dihydroxy-6-methyl-4-[(2S,3R,4R,5R,6S)-3,4,5-trihydroxy-6-methyloxan-2-yl]oxyoxan-2-yl]oxymethyl]-3,4,5-trihydroxyoxan-2-yl]oxy-5,7-dihydroxy-2-(4-hydroxyphenyl)chromen-4-one
13551	577.447	14.03	14.03	0	1-[1-tert-butyl-3-(2,4-difluorophenyl)-1H-pyrazole-4-carbonyl]-3-methylazetidin-3-ol
22321	760.824	21.1	21.1	0
18443	1763.51	19.11	19.11	0
658	521.336	2.52	2.52	0	Spectral Match to Undecaethylene glycol from NIST14
7762	397.35	10.23	10.23	0
58	211.083	1.81	1.81	0	Candidate Amylamine-C5:0 (delta mass:84.0575)
2717	472.15	7.16	7.16	0	Z1737131545
20738	915.602	20.59	20.59	0
13851	993.742	14.3	14.3	0
6320	796.543	9.49	9.49	0	Spectral Match to Undecaethylene glycol from NIST14
1292	588.409	3.91	3.91	0	Z2073690412
1052	311.068	3.25	3.25	0
345	437.235	2.16	2.16	0	Candidate Serine-C14:1 (delta mass:208.1837)
22072	945.713	21.03	21.03	0
9931	372.347	11.24	11.24	0
10260	226.18	11.45	11.45	0	VITAMIN K1 CollisionEnergy:102040
10121	768.419	11.37	11.37	0
15031	927.725	15.67	15.67	0
21228	919.716	20.79	20.79	0
11013	418.329	11.78	11.78	0	2-[(4-chlorophenyl)sulfonyl]-N-(1H-1,2,4-triazol-3-yl)acetamide
1553	228.179	6.14	6.14	0	Pyrenocine B putative
18769	858.755	19.47	19.47	0
1911	309.087	6.68	6.68	0	3_HydroxyPhenyl_AceticAcid
12106	834.24	12.67	12.67	0
11636	898.786	12.28	12.28	0	TG(18:2/18:3/20:1); [M+NH4]+ C59H106N1O6
4753	406.295	8.42	8.42	0	Lecanoric Acid
21685	988.718	20.89	20.89	0
5472	528.178	8.88	8.88	0
15560	1019.69	16.5	16.5	0
14595	761.22	15.09	15.09	0
1701	262.163	6.44	6.44	0	ReSpect:PM014408 Cyclo(Phe-Ile)
5610	733.556	9.01	9.01	0
6310	379.13	9.46	9.46	0
8123	395.276	10.38	10.38	0	Asp-C20:1
6958	788.21	9.83	9.83	0
8646	1020.77	10.6	10.6	0
22324	614.819	21.1	21.1	0
10611	901.799	11.67	11.67	0
19838	756.51	20.17	20.17	0
18028	1019.69	18.83	18.83	0
6343	857.515	9.47	9.47	0
102	267.077	1.86	1.86	0	Liquiritigenin
16647	682.574	17.66	17.66	0
6959	792.163	9.83	9.83	0
13261	354.336	13.68	13.68	0
416	262.126	2.19	2.19	0	898459-23-9
15420	666.987	16.29	16.29	0
10265	209.153	11.45	11.45	0	VITAMIN K1 CollisionEnergy:102040
7903	456.253	10.27	10.27	0
6697	373.098	9.72	9.72	0
19469	891.741	19.88	19.88	0	iopromide
4393	544.173	8.14	8.14	0
9198	897.752	10.86	10.86	0	TG(18:1/18:2/18:2); [M+NH4]+ C57H104N1O6
17989	979.763	18.77	18.77	0
18087	625.632	18.89	18.89	0
5580	432.12	8.94	8.94	0	AKOS026183219
3130	677.081	7.28	7.28	0
9268	397.35	10.85	10.85	0	Asp-C22:1
91	258.112	1.9	1.9	0	GUANOSINE 5'-MONOPHOSPHATE - 30.0 eV
53	235.119	1.8	1.8	0
250	249.157	2.08	2.08	0
21577	837.695	20.9	20.9	0
4524	375.08	8.26	8.26	0	Capsaicin
19827	1343.93	20.18	20.18	0
9455	874.781	10.96	10.96	0	TG(16:0/18:1/18:2); [M+NH4]+ C55H104N1O6
208	201.123	2.01	2.01	0	3-isobutylidene-hexahydro-pyrrolo[1,2-a]pyrazine-1,4-dione
15822	1737.5	16.82	16.82	0
5002	804.214	8.62	8.62	0
11688	685.435	12.34	12.34	0
22422	664.458	21.18	21.18	0	Sarmentoside B
20982	895.738	20.69	20.69	0
9412	737.508	10.92	10.92	0
13132	1034.67	13.57	13.57	0
21006	893.721	20.68	20.68	0
7290	772.586	10	10	0	SM(d18:2/18:1); [M+H]+ C41H80N2O6P1
6601	271.154	9.66	9.66	0	Spectral Match to p-tert-Octylphenol tetraglycol ether from NIST14
22350	556.861	21.1	21.1	0
1362	214.163	4.37	4.37	0	Spectral Match to Val-Leu from NIST14
7850	735.348	10.23	10.23	0
21353	911.729	20.78	20.78	0
10586	847.655	11.64	11.64	0
6031	576.506	9.29	9.29	0
9853	928.826	11.18	11.18	0
19210	955.756	19.76	19.76	0
4071	512.254	7.84	7.84	0
21636	447.905	20.96	20.96	0
1576	301.174	6.18	6.18	0	cyclo(D-Trp-L-Pro)
6213	236.172	9.41	9.41	0
13881	630.494	14.39	14.39	0
21079	344.228	20.72	20.72	0	azelaic_acid
6460	318.206	9.58	9.58	0
98	250.089	1.86	1.86	0
13407	993.742	13.87	13.87	0
21458	664.457	20.79	20.79	0	Sarmentoside B
9748	397.35	11.1	11.1	0
9780	923.767	11.17	11.17	0
7336	643.345	10.02	10.02	0	Massbank:AU581152 Bisphenol A (3-chloro-2-hydroxypropyl) glycidyl ether|Bisphenol A (3-chloro-2-hydroxypropyl)glycidyl ether|1-chloro-3-[4-[2-[4-(oxiran-2-ylmethoxy)phenyl]propan-2-yl]phenoxy]propan-2-ol
8747	755.407	10.66	10.66	0
20027	611.184	20.37	20.37	0
12033	918.811	12.63	12.63	0
14543	1033.67	15.05	15.05	0
22016	920.719	21.02	21.02	0
8469	689.524	10.53	10.53	0
17027	625.632	18.09	18.09	0
22360	216.923	21.1	21.1	0	CAPSAICIN
653	503.306	2.52	2.52	0
15567	970.739	16.57	16.57	0
56	365.105	1.8	1.8	0
20784	1130.31	20.59	20.59	0
3275	633.812	7.3	7.3	0	Spectral Match to Undecaethylene glycol from NIST14
17738	916.671	18.66	18.66	0
20406	664.456	20.4	20.4	0	Sarmentoside B
14297	907.763	14.88	14.88	0
15915	1019.69	16.93	16.93	0
16437	597.601	17.41	17.41	0
10761	513.506	11.68	11.68	0
448	481.261	2.29	2.29	0	Candidate Serine-C17:0 (delta mass:252.2465)
18080	1763.51	18.89	18.89	0
4412	587.383	8.15	8.15	0
16452	1737.5	17.43	17.43	0
13632	1137.86	14.04	14.04	0
394	361.048	2.2	2.2	0	ethyl_indole_3_carboxylic_acid
22576	734.812	21.18	21.18	0
16833	926.269	17.84	17.84	0
21131	920.741	20.75	20.75	0
1898	325.154	6.66	6.66	0
2724	387.17	7.16	7.16	0
10572	628.499	11.63	11.63	0
6990	318.287	9.85	9.85	0
14303	1789.53	14.88	14.88	0
15455	957.68	16.31	16.31	0	202821-81-6
3956	228.196	7.73	7.73	0	Candidate Tryptamine-C16:1 (delta mass:236.2137)
7373	732.553	10.02	10.02	0
123	285.134	1.88	1.88	0
11248	708.511	11.97	11.97	0
16963	937.752	18.01	18.01	0
18877	940.763	19.52	19.52	0
15997	1019.69	17	17	0
4270	688.345	8.04	8.04	0
2285	202.216	6.99	6.99	0
1986	390.181	6.74	6.74	0	Spectral Match to Octadecanamide from NIST14
23134	881.76	21.33	21.33	0
9466	908.791	10.97	10.97	0
5357	835.534	8.82	8.82	0
6231	683.47	9.43	9.43	0
16981	957.681	18.03	18.03	0
20618	664.457	20.46	20.46	0	Sarmentoside B
4262	433.241	8.04	8.04	0	Methyl orsellincarboxylate
8167	698.415	10.41	10.41	0
15581	557.094	16.55	16.55	0	AKOS034596013
23754	276.897	23.33	23.33	0
17478	1019.69	18.51	18.51	0
17171	722.551	18.24	18.24	0	Tiratricol
11588	1007.72	12.33	12.33	0
4507	703.388	8.25	8.25	0
7908	456.441	10.24	10.24	0
6532	515.357	9.63	9.63	0	Spectral Match to p-tert-Octylphenol heptaglycol ether from NIST14
9303	642.342	10.88	10.88	0
4459	543.357	8.2	8.2	0
19019	955.756	19.62	19.62	0
2738	291.113	7.17	7.17	0	[(2R,3S,4S,5R,6R)-3,4,5-trihydroxy-6-[2-(4-hydroxyphenyl)ethoxy]oxan-2-yl]methyl 2-(2-oxo-1,3-dihydroindol-3-yl)acetate
5660	388.342	9	9	0
18073	879.737	18.9	18.9	0
5636	723.371	9	9	0
10198	926.819	11.43	11.43	0
11861	832.241	12.46	12.46	0
14477	761.22	14.99	14.99	0
3583	496.223	7.42	7.42	0	PLATYPHYLLENONE
4849	433.241	8.5	8.5	0	5-O-Demethylnobiletin
3144	684.418	7.28	7.28	0
23027	372.348	21.32	21.32	0
21666	218.108	20.9	20.9	0
19174	1442.4	19.73	19.73	0
15237	597.601	16.03	16.03	0
7351	576.507	10.02	10.02	0
16187	942.774	17.15	17.15	0
18456	877.725	19.19	19.19	0
21456	913.747	20.83	20.83	0
21089	327.201	20.72	20.72	0
6209	403.397	9.4	9.4	0
13068	1012.68	13.51	13.51	0
54	314.091	1.8	1.8	0	5'-Deoxy-5'-(methylsulfinyl)adenosine
105	296.135	1.86	1.86	0
9830	718.43	11.18	11.18	0
1417	248.059	5.34	5.34	0	cyclo-(Val-Phe)
173	290.147	1.96	1.96	0
15279	597.601	16.07	16.07	0
6075	578.522	9.31	9.31	0
21872	664.457	20.91	20.91	0	Sarmentoside B
13019	353.352	13.46	13.46	0
21751	906.753	20.92	20.92	0
20756	967.791	20.64	20.64	0
21563	736.543	20.81	20.81	0
7326	603.534	10.03	10.03	0
8385	733.556	10.5	10.5	0
17043	970.739	18.14	18.14	0
1370	285.143	4.46	4.46	0	cyclo(D-Trp-L-Pro)
20795	1711.48	20.61	20.61	0
22652	625.633	21.22	21.22	0
9797	875.781	11.14	11.14	0
19482	1759.48	19.87	19.87	0
374	259.107	2.17	2.17	0
22679	218.103	21.13	21.13	0
9724	738.386	11.12	11.12	0
13230	602.464	13.65	13.65	0
2186	261.102	6.92	6.92	0	cyclo-(Val-Phe)
17907	923.768	18.7	18.7	0
6198	452.2	9.4	9.4	0
585	249.157	2.33	2.33	0	1-(3,4-dimethylphenyl)-2-oxopyrrolidine-3-carboxylic acid
17346	970.739	18.38	18.38	0
16171	696.008	17.16	17.16	0
16723	682.574	17.74	17.74	0
4787	452.103	8.46	8.46	0
13836	1005.71	14.33	14.33	0
15592	519.138	16.56	16.56	0	3,4-di-O-galloylquinic acid
4505	623.254	8.25	8.25	0
6940	528.326	9.82	9.82	0	21-hydroxy-10-methoxy-1,4,14,19,19-pentamethyl-2,7,18-trioxapentacyclo[11.9.0.0 , .0?,?.0 ?, ?]docosa-3(11),4,9-triene-8,17-dione
5156	614.411	8.71	8.71	0
15376	938.754	16.28	16.28	0
16870	660.592	17.87	17.87	0
17696	1370.38	18.62	18.62	0
7282	733.557	9.99	9.99	0
16774	668.654	17.8	17.8	0
9000	339.345	10.73	10.73	0	Spectral Match to Palmitelaidic acid from NIST14
19389	921.752	19.83	19.83	0
4515	674.353	8.25	8.25	0
15966	942.708	17.02	17.02	0
16569	984.718	17.61	17.61	0
5901	500.185	9.19	9.19	0	1,7-bis(4-hydroxyphenyl)heptan-3-one
20340	1762.5	20.45	20.45	0
18740	984.718	19.41	19.41	0
22081	441.298	21.03	21.03	0	13-Hydroxylupanine_CE15
7159	359.371	9.99	9.99	0
7276	761.588	10.02	10.02	0	Spectral Match to 1-(9Z-Octadecenoyl)-2-tetradecanoyl-sn-glycero-3-phosphocholine from NIST14
15705	942.708	16.69	16.69	0
15311	665.011	16.2	16.2	0
22328	365.106	21.1	21.1	0
18524	668.654	19.25	19.25	0	EiM07-17243
5699	786.602	9.04	9.04	0
14207	993.742	14.78	14.78	0
13728	1028.71	14.25	14.25	0	202821-81-6
13800	832.241	14.22	14.22	0
16549	885.591	17.51	17.51	0
8778	934.805	10.72	10.72	0
4737	388.196	8.41	8.41	0	Massbank: Cholesterol
336	261.123	2.14	2.14	0
392	205.097	2.23	2.23	0	cyclo-(Gly-Leu)
7346	670.373	10.02	10.02	0
5256	328.357	8.74	8.74	0
14056	998.697	14.61	14.61	0
18757	956.759	19.44	19.44	0
4496	658.358	8.23	8.23	0
22345	422.882	21.1	21.1	0
17139	668.654	18.2	18.2	0
5581	410.138	8.94	8.94	0	2-[2-(phenylcarbonyl)benzimidazolyl]-N-(2-phenylethyl)acetamide CollisionEnergy:205060
4282	700.28	8.05	8.05	0
20670	941.774	20.59	20.59	0
16627	980.764	17.6	17.6	0
15027	906.259	15.67	15.67	0
8830	837.694	10.74	10.74	0
14066	685.203	14.7	14.7	0
7377	283.175	10.05	10.05	0	Spectral Match to Myristoleic acid from NIST14
10052	603.465	11.32	11.32	0	Z17633597
8751	359.204	10.62	10.62	0
4754	423.202	8.42	8.42	0
20342	1789.53	20.42	20.42	0
21178	664.457	20.72	20.72	0	Sarmentoside B
9511	918.811	10.99	10.99	0
10100	1020.7	11.36	11.36	0
17009	943.711	18.03	18.03	0
5662	576.506	9	9	0
11969	581.386	12.54	12.54	0	Z2228975261
17877	921.63	18.67	18.67	0
19205	921.752	19.79	19.79	0
16222	888.641	17.21	17.21	0
6671	478.389	9.7	9.7	0	Massbank:PR310643 Speciosine
22258	686.44	21.08	21.08	0
12296	928.828	12.83	12.83	0
4969	205.076	8.6	8.6	0
14802	927.725	15.39	15.39	0
18566	984.718	19.29	19.29	0
14638	597.601	15.24	15.24	0
3697	470.296	7.47	7.47	0
12089	833.241	12.67	12.67	0
4207	290.079	7.98	7.98	0	Massbank:KO002135 3-Amino-1,2-propanediol|3-Aminopropane-1,2-diol
11944	511.273	12.53	12.53	0	2R,3S,4S,5R,6S)-2-[[(2R,3R,4R)-3,4-dihydroxy-4-(hydroxymethyl)oxolan-2-yl]oxymethyl]-6-[4-hydroxy-3-(3-methylbut-2-enyl)phenoxy]oxane-3,4,5-triol
8026	239.149	10.35	10.35	0	2-methyl-4-phenyl-1,3-thiazole-5-carboxylic Acid
8005	734.567	10.35	10.35	0
19470	872.771	19.87	19.87	0	TG(15:0/18:2/18:2); [M+NH4]+ C54H100N1O6
22947	663.272	21.2	21.2	0	Spectral Match to Tributyl phosphate from NIST14
4366	351.214	8.12	8.12	0	Cocaine
21497	1763.51	20.82	20.82	0
5407	313.097	8.84	8.84	0	Isovaleroylglycine - 30.0 eV
7564	551.467	10.13	10.13	0
6109	338.541	9.33	9.33	0
23357	291.89	21.49	21.49	0
11966	519.379	12.53	12.53	0
3445	931.625	7.34	7.34	0	"((R)-4-((3R,5S,7S,8R,9S,10S,12S,13R,14S,17R)-3,7,12-trihydroxy-10,13-dimethylhexadecahydro-1H-cyclopenta[a]phenanthren-17-yl)pentanoyl)glycine"
19873	1542.18	20.18	20.18	0
3489	454.119	7.35	7.35	0
7328	626.319	10.02	10.02	0
10912	355.07	11.82	11.82	0	Candidate Serine-C8:0 (delta mass:126.1053)
13538	579.924	14.02	14.02	0
16942	660.592	17.93	17.93	0
19453	941.774	19.87	19.87	0
14041	609.447	14.65	14.65	0
5429	280.154	8.86	8.86	0
1364	275.118	4.4	4.4	0	Z1738343946
6625	786.602	9.7	9.7	0
8035	340.358	10.34	10.34	0
18313	900.611	19.05	19.05	0	TG(16:0/18:1/18:1); [M+NH4]+ C55H106N1O6
17032	979.762	18.02	18.02	0
18071	956.687	18.86	18.86	0
22030	903.742	20.99	20.99	0
8829	832.739	10.72	10.72	0	TG(18:2/18:2/18:2); [M+NH4]+ C57H102N1O6
6345	357.356	9.51	9.51	0
22453	894.704	21.18	21.18	0
4662	280.133	8.35	8.35	0
4927	251.164	8.58	8.58	0
9664	708.511	11.1	11.1	0
15814	905.75	16.83	16.83	0
9653	726.55	11.09	11.09	0	Masitinib
12189	1012.68	12.73	12.73	0
318	433.283	2.16	2.16	0	Spectral Match to Undecaethylene glycol from NIST14
23403	465.172	21.52	21.52	0
8523	380.352	10.54	10.54	0
5391	418.389	8.83	8.83	0
10903	631.192	11.82	11.82	0
20044	879.737	20.37	20.37	0
17579	668.654	18.55	18.55	0
18628	1763.51	19.33	19.33	0
8383	898.786	10.52	10.52	0	TG(18:2/18:2/19:0); [M+NH4]+ C58H108N1O6
16725	943.711	17.76	17.76	0
2744	401.069	7.17	7.17	0
8712	379.34	10.64	10.64	0
21224	941.774	20.75	20.75	0
10106	399.366	11.36	11.36	0	Candidate Aspartic acid-C16:1 (delta mass:236.214)
8360	738.509	10.49	10.49	0
6113	760.583	9.34	9.34	0	Spectral Match to 1-Myristoyl-2-palmitoyl-sn-glycero-3-phosphocholine from NIST14
6611	384.31	9.67	9.67	0	Spectral Match to p-tert-Octylphenol tetraglycol ether from NIST14
20341	1763.51	20.48	20.48	0
9792	898.786	11.17	11.17	0	TG(18:1/18:2/18:2); [M+NH4]+ C57H104N1O6
15017	597.601	15.67	15.67	0
7928	730.539	10.33	10.33	0
6485	440.089	9.59	9.59	0	Etofenprox_CE30
7291	372.347	9.99	9.99	0
20609	922.759	20.55	20.55	0
5377	345.217	8.82	8.82	0	Massbank:PR020131 N-(3-Indolylacetyl)-L-isoleucine|Indole-3-acetyl-L-isoleucine|IAA-Ile|IAA-L-Ile|L-isoleucine, N-(1H-indol-3-ylacetyl)-|L-Isoleucine, N-(1H-indol-3-ylacetyl)- (9CI)
17623	1737.5	18.59	18.59	0
9239	900.796	10.88	10.88	0	TG(16:1/18:1/18:1); [M+NH4]+ C55H104N1O6
1252	652.41	3.76	3.76	0
13257	568.566	13.74	13.74	0
4267	446.237	8.04	8.04	0	captopril disulfide metabolite (putative)
15141	622.613	15.88	15.88	0
21916	784.544	20.92	20.92	0
21573	1763.51	20.86	20.86	0
19761	1326.9	20.17	20.17	0
2213	397.154	6.94	6.94	0
20747	611.185	20.56	20.56	0	Baccatin III
10725	399.366	11.67	11.67	0
19169	1055.3	19.72	19.72	0
18532	941.774	19.26	19.26	0
21361	339.345	20.79	20.79	0	Spectral Match to Palmitelaidic acid from NIST14
10945	901.799	11.83	11.83	0
11425	1042.69	12.15	12.15	0	202821-81-6
19017	984.718	19.6	19.6	0
8709	901.799	10.66	10.66	0	TG(16:1/18:1/18:2); [M+NH4]+ C55H102N1O6
21450	394.213	20.81	20.81	0
19807	1568.2	20.18	20.18	0
5955	643.142	9.22	9.22	0
17960	1444.4	18.75	18.75	0
422	259.115	2.29	2.29	0
20706	1343.93	20.52	20.52	0
14296	905.75	14.89	14.89	0
18921	984.718	19.54	19.54	0
7963	463.342	10.32	10.32	0
1401	286.155	5.23	5.23	0	Massbank:PR304069 Indole-3-acetyl-L-valine
14280	879.736	14.87	14.87	0
6937	510.296	9.82	9.82	0
6217	245.107	9.41	9.41	0
7317	645.351	10.02	10.02	0
18931	941.774	19.54	19.54	0
9859	739.412	11.19	11.19	0
6383	357.3	9.53	9.53	0
5712	263.07	9.06	9.06	0	Massbank:BML01684 Esculetin
6211	404.4	9.4	9.4	0
7005	396.28	9.91	9.91	0
89	251.15	1.84	1.84	0
1386	222.112	5.09	5.09	0	Z3416538736
15365	977.684	16.24	16.24	0
17228	956.687	18.3	18.3	0
9211	614.483	10.86	10.86	0
4263	410.165	8.04	8.04	0
4918	806.376	8.57	8.57	0
22272	218.92	21.1	21.1	0	4,7,8-trimethoxy-3,5-dimethylchromen-2-one
7250	759.574	9.99	9.99	0	Spectral Match to 1,2-Dipalmitoleoyl-sn-glycero-3-phosphocholine from NIST14
21781	737.548	20.91	20.91	0
18385	899.607	19.06	19.06	0	TG(18:1/18:1/18:2); [M+NH4]+ C57H106N1O6
11963	490.344	12.54	12.54	0
22594	462.862	21.18	21.18	0
15646	597.601	16.57	16.57	0	4-(3,4-dihydroxyphenyl)-7-hydroxy-5-[3,4,5-trihydroxy-6-[(3,4,5-trihydroxyoxan-2-yl)oxymethyl]oxan-2-yl]oxychromen-2-one
9485	939.759	10.99	10.99	0
18325	1759.48	19.08	19.08	0
15913	889.724	16.9	16.9	0
3461	969.575	7.34	7.34	0
5524	335.22	8.9	8.9	0	Massbank:FFF00046 24-Ethylepicoprostanol
7561	983.199	10.13	10.13	0	Ginsenoside Re
5078	848.24	8.67	8.67	0
20895	541.121	20.7	20.7	0	Z1590077199
19417	611.184	19.81	19.81	0	Baccatin III
22356	1100.76	21.1	21.1	0
18827	934.806	19.49	19.49	0
9417	926.818	10.97	10.97	0
4294	364.284	8.07	8.07	0
6190	214.216	9.46	9.46	0	2-Octyl-2H-isothiazol-3-one_CE15
17133	1737.5	18.19	18.19	0
13323	1034.67	13.68	13.68	0
13560	1020.77	14.04	14.04	0	202821-81-6
14422	941.774	14.98	14.98	0
5213	754.213	8.73	8.73	0
12664	1012.68	13.12	13.12	0
11985	1047.65	12.54	12.54	0
21811	945.714	20.96	20.96	0
12454	485.381	12.93	12.93	0	[5-ethenyl-3-hydroxy-4-(3-hydroxyprop-1-en-2-yl)-2-(3-methoxy-3-oxoprop-1-en-2-yl)-5-methylcyclohexyl] 4-acetyloxy-3-hydroxy-2-methylidenebutanoate
8105	397.35	10.44	10.44	0	Asp-C22:1
19133	895.738	19.73	19.73	0
6055	733.557	9.3	9.3	0
15561	597.601	16.48	16.48	0
21841	771.523	20.92	20.92	0
8886	926.817	10.74	10.74	0
15152	597.601	15.87	15.87	0
18365	1128.31	19.08	19.08	0
12034	923.768	12.62	12.62	0
735	521.336	2.73	2.73	0	Spectral Match to Undecaethylene glycol from NIST14
22313	818.783	21.1	21.1	0
4049	415.201	7.83	7.83	0
18295	625.632	19.02	19.02	0
18460	1759.48	19.21	19.21	0
297	259.107	2.1	2.1	0
8224	372.101	10.43	10.43	0	Spectral Match to Cyclopentasiloxane, decamethyl- from NIST14
3985	302.269	7.77	7.77	0	5-cyclopropylnicotinic acid
12965	1079.82	13.42	13.42	0
14214	712.234	14.79	14.79	0	202821-81-6
5606	346.201	8.97	8.97	0
396	371.227	2.18	2.18	0	Spectral Match to Hexaethylene glycol from NIST14
6319	616.463	9.5	9.5	0
6694	272.245	9.72	9.72	0	Massbank:FFF00032 Coprostanone
10365	574.519	11.52	11.52	0
7890	664.274	10.27	10.27	0	Sarmentoside B
22212	647.298	21.07	21.07	0
20241	686.439	20.37	20.37	0
2843	345.181	7.21	7.21	0
9757	355.282	11.14	11.14	0
6401	273.257	9.55	9.55	0	Massbank:FFF00046 24-Ethylepicoprostanol
6942	548.252	9.82	9.82	0	AR-9281
7987	599.503	10.29	10.29	0
22037	863.71	20.97	20.97	0
9708	702.438	11.11	11.11	0	[(2R,3S,4S,5R,6R)-6-[1,7-bis(3,4-dihydroxyphenyl)-5-oxoheptan-3-yl]oxy-3,4,5-trihydroxyoxan-2-yl]methyl (E)-3-(3,4-dimethoxyphenyl)prop-2-enoate
21867	908.768	20.95	20.95	0
19668	1543.18	20.08	20.08	0
6954	770.18	9.83	9.83	0
6398	292.271	9.54	9.54	0	Spectral Match to .omega.-3 Arachidonic acid ethyl ester from NIST14
23220	663.272	21.3	21.3	0	Spectral Match to Tributyl phosphate from NIST14
5885	388.342	9.18	9.18	0
6051	398.079	9.29	9.29	0
21321	923.768	20.79	20.79	0
4510	702.384	8.25	8.25	0
9865	399.366	11.21	11.21	0
8746	734.426	10.66	10.66	0
14331	685.203	14.8	14.8	0
6991	217.195	9.85	9.85	0	Spectral Match to .alpha.-Bisabolol from NIST14
3992	396.259	7.76	7.76	0
21838	785.547	20.95	20.95	0
10724	396.347	11.69	11.69	0
9291	921.73	10.89	10.89	0
18695	965.782	19.37	19.37	0
18826	925.779	19.47	19.47	0
8659	239.149	10.62	10.62	0	5-[(8aS)-2,5,5,8a-tetramethyl-3-oxo-4a,6,7,8-tetrahydro-4H-naphthalen-1-yl]-3-methylpentanoic acid
7849	397.216	10.24	10.24	0	Asp-C22:1
20030	1130.31	20.38	20.38	0
4014	315.113	7.8	7.8	0
22268	886.77	21.09	21.09	0
4005	422.29	7.79	7.79	0
21612	911.729	20.85	20.85	0
21890	737.509	20.96	20.96	0
20596	1310.21	20.53	20.53	0
6992	317.284	9.85	9.85	0
150	216.102	1.97	1.97	0	Palonosetron_20eV
1048	212.147	3.26	3.26	0	Massbank:PR300811 Cyclo(proline-leucine)
20368	1345.93	20.41	20.41	0
11965	532.373	12.53	12.53	0
14864	923.769	15.43	15.43	0
17621	901.586	18.56	18.56	0	TG(18:1/18:1/18:2); [M+NH4]+ C57H106N1O6
6882	772.586	9.83	9.83	0
19968	1364.86	20.17	20.17	0
8962	643.345	10.7	10.7	0	Massbank:AU581152 Bisphenol A (3-chloro-2-hydroxypropyl) glycidyl ether|Bisphenol A (3-chloro-2-hydroxypropyl)glycidyl ether|1-chloro-3-[4-[2-[4-(oxiran-2-ylmethoxy)phenyl]propan-2-yl]phenoxy]propan-2-ol
5556	335.294	8.93	8.93	0
23180	873.49	21.33	21.33	0	TG(16:0/18:2/18:2); [M+NH4]+ C55H102N1O6
6188	453.204	9.4	9.4	0	Massbank:AU581151 Bisphenol A (3-chloro-2-hydroxypropyl) glycidyl ether|Bisphenol A (3-chloro-2-hydroxypropyl)glycidyl ether|1-chloro-3-[4-[2-[4-(oxiran-2-ylmethoxy)phenyl]propan-2-yl]phenoxy]propan-2-ol
6266	576.506	9.43	9.43	0
5772	423.214	9.11	9.11	0	Candidate Serine-C13:1 (delta mass:194.1681)
22596	530.85	21.18	21.18	0
20878	771.524	20.6	20.6	0
5442	419.181	8.87	8.87	0
13545	995.747	14.04	14.04	0
10682	401.224	11.7	11.7	0
3904	319.303	7.62	7.62	0	amylamine-C11:0
5975	857.515	9.28	9.28	0
21460	283.175	20.76	20.76	0
4127	445.24	7.9	7.9	0
4785	644.421	8.46	8.46	0
18490	956.687	19.2	19.2	0
8765	898.786	10.63	10.63	0	TG(18:1/18:2/18:2); [M+NH4]+ C57H104N1O6
20306	916.799	20.46	20.46	0
17052	984.718	18.08	18.08	0
8107	776.576	10.41	10.41	0
15400	1789.53	16.32	16.32	0
21386	218.103	20.81	20.81	0
9834	919.715	11.19	11.19	0
3651	626.33	7.45	7.45	0
9803	934.804	11.19	11.19	0
16081	941.77	17.01	17.01	0
15422	597.601	16.28	16.28	0
6680	408.123	9.71	9.71	0	Bamaquimast
4143	337.293	7.92	7.92	0	_130094
169	258.112	1.96	1.96	0	Spectral Match to Phloretin from NIST14
15348	1014.74	16.24	16.24	0
4511	624.257	8.27	8.27	0
1235	476.328	3.56	3.56	0
7941	372.347	10.29	10.29	0
19084	625.632	19.64	19.64	0
2757	382.154	7.18	7.18	0	XANTHOSINE - 40.0 eV
3585	390.181	7.42	7.42	0	Phloretin
4041	380.316	7.82	7.82	0	Z1987153222
8124	339.345	10.38	10.38	0
15358	976.743	16.25	16.25	0
10207	676.499	11.42	11.42	0
3776	672.402	7.51	7.51	0
8254	397.382	10.42	10.42	0	Asp-C22:1
2731	292.097	7.17	7.17	0
19546	897.752	19.93	19.93	0
10654	663.335	11.67	11.67	0
21965	973.74	21.01	21.01	0
19743	793.61	20.16	20.16	0	Z17633597
11978	546.407	12.54	12.54	0
201	211.107	2	2	0	2-methyl-3-(oxolan-2-yl)propanoic Acid
789	300.134	2.88	2.88	0
6246	493.348	9.44	9.44	0
17433	625.632	18.44	18.44	0
13841	998.697	14.28	14.28	0
8554	926.817	10.57	10.57	0
4339	656.197	8.11	8.11	0
4293	577.134	8.07	8.07	0
19387	1129.32	19.84	19.84	0
15355	972.733	16.23	16.23	0
7755	419.315	10.22	10.22	0
6628	351.099	9.67	9.67	0	Cocaine
10676	458.29	11.7	11.7	0
19153	1444.4	19.68	19.68	0
8755	919.715	10.68	10.68	0
9876	679.43	11.2	11.2	0
15678	927.725	16.62	16.62	0
23392	283.857	21.52	21.52	0
18856	905.751	19.49	19.49	0
7798	217.034	10.22	10.22	0	Massbank:LU052303 Acetyl tributyl citrate|tributyl 2-acetyloxypropane-1,2,3-tricarboxylate
22220	880.737	21.07	21.07	0
4054	533.293	7.83	7.83	0
304	361.048	2.13	2.13	0	ethyl_indole_3_carboxylic_acid
17734	668.654	18.64	18.64	0
6455	278.183	9.58	9.58	0	7-methoxy-2-phenyl-4H-chromen-4-one
18799	1763.51	19.4	19.4	0
22318	420.885	21.1	21.1	0
19724	608.394	20.17	20.17	0	Sarmentoside B
4445	373.212	8.18	8.18	0
13660	993.742	14.17	14.17	0
21874	891.742	20.93	20.93	0
11743	1012.68	12.37	12.37	0
5119	449.149	8.68	8.68	0	AKOS016377805
4093	485.315	7.86	7.86	0
22355	352.898	21.1	21.1	0
19920	687.441	20.17	20.17	0
8196	1785.5	10.45	10.45	0
21273	922.758	20.77	20.77	0
13035	1034.67	13.53	13.53	0
14938	853.25	15.53	15.53	0
8943	928.829	10.78	10.78	0
11708	918.811	12.34	12.34	0	TG(17:1/18:1/18:1); [M+NH4]+ C56H106N1O6
1006	360.103	3.23	3.23	0
4434	278.175	8.17	8.17	0	Kinoprene_CE45
14624	927.725	15.22	15.22	0
8941	874.782	10.74	10.74	0	TG(16:0/18:1/18:2); [M+NH4]+ C55H104N1O6
6428	625.393	9.57	9.57	0
10220	923.767	11.45	11.45	0
8132	371.2	10.39	10.39	0
16486	668.654	17.46	17.46	0
9826	717.429	11.18	11.18	0
10853	472.108	11.79	11.79	0
8311	760.585	10.46	10.46	0
16181	519.138	17.11	17.11	0
18374	1129.32	19.1	19.1	0
12744	474.321	13.19	13.19	0
22331	1042.8	21.1	21.1	0
21607	708.512	20.89	20.89	0
8925	731.408	10.74	10.74	0
5938	285.334	9.21	9.21	0	Toxoflavin
9709	718.461	11.11	11.11	0	chlorogenic acid
14332	687.201	14.8	14.8	0
22050	400.213	21	21	0
7581	337.31	10.14	10.14	0	Spectral Match to 9-Octadecenamide, (Z)- from NIST14
5768	419.262	9.11	9.11	0
7295	317.284	10	10	0
4068	529.341	7.83	7.83	0
3940	273.262	7.71	7.71	0	Massbank:LU030803 Lauryldiethanolamine|2-[dodecyl(2-hydroxyethyl)amino]ethanol
16399	943.711	17.29	17.29	0
10910	630.192	11.82	11.82	0
160	268.165	1.94	1.94	0
773	521.336	2.8	2.8	0
3262	639.537	7.29	7.29	0
9168	676.395	10.85	10.85	0
21837	903.741	20.9	20.9	0
13010	1084.78	13.46	13.46	0
431	389.257	2.23	2.23	0
8454	901.8	10.55	10.55	0
5681	228.76	9	9	0	N-[(cyclohex-1-en-1-yl)methyl]-4-hydroxy-3,3-dimethylpiperidine-1-carboxamide
14931	851.252	15.53	15.53	0
22226	865.727	21.06	21.06	0
4249	434.244	8.04	8.04	0	953919-81-8
17847	970.739	18.67	18.67	0
4373	311.221	8.13	8.13	0
17780	979.763	18.67	18.67	0
22316	736.544	21.07	21.07	0
20424	915.602	20.48	20.48	0
13802	339.345	14.27	14.27	0	Spectral Match to cis-9-Hexadecenoic acid from NIST14
21732	905.75	20.9	20.9	0
4832	474.268	8.5	8.5	0
6604	733.556	9.65	9.65	0
19332	837.694	19.83	19.83	0
21451	893.718	20.85	20.85	0
3841	679.409	7.51	7.51	0
10626	717.457	11.68	11.68	0
12432	1026.73	12.92	12.92	0
7273	787.606	10	10	0	PC(P-16:0/18:2); [M+H]+ C42H81N1O7P1
5837	669.455	9.14	9.14	0
21646	971.733	20.9	20.9	0
10287	808.391	11.48	11.48	0
7231	239.164	9.96	9.96	0
1718	406.176	6.45	6.45	0
6647	259.246	9.69	9.69	0	edrophonium
9710	739.389	11.12	11.12	0
13447	441.297	13.92	13.92	0	13-Hydroxylupanine_CE15
7361	356.352	9.96	9.96	0	Z2229831406
6293	322.237	9.47	9.47	0
14302	1763.51	14.88	14.88	0
21523	1785.5	20.79	20.79	0
630	259.115	2.43	2.43	0
7582	319.299	10.14	10.14	0	"methyl (4R)-4-((3R,5S,7S,9S,10S,13R,14S,17R)-3,7-dihydroxy-10,13-dimethylhexadecahydro-1H-cyclopenta[a]phenanthren-17-yl)pentanoate"
2254	247.246	6.97	6.97	0	METHYL STEARATE
15851	1019.69	16.79	16.79	0
6721	329.245	9.72	9.72	0
6265	318.199	9.44	9.44	0	NCGC00385595-01
5831	691.437	9.15	9.15	0
5477	250.086	8.89	8.89	0
1421	264.032	5.36	5.36	0
17258	625.632	18.3	18.3	0
17117	625.632	18.18	18.18	0
19820	915.601	20.17	20.17	0	PC(18:1/24:1); [M+H]+ C50H97N1O8P1
3545	568.296	7.39	7.39	0
11203	717.457	11.92	11.92	0
16633	978.759	17.6	17.6	0
16589	503.107	17.58	17.58	0
19877	1543.18	20.17	20.17	0
3492	451.165	7.35	7.35	0
14590	998.697	15.1	15.1	0
8643	928.829	10.61	10.61	0
4746	221.19	8.42	8.42	0	MEGxp0_000372
439	477.309	2.3	2.3	0	Spectral Match to Undecaethylene glycol from NIST14
7805	274.1	10.23	10.23	0	Massbank:LU052303 Acetyl tributyl citrate|tributyl 2-acetyloxypropane-1,2,3-tricarboxylate
18668	1759.48	19.34	19.34	0
16352	696.008	17.29	17.29	0
12204	927.725	12.74	12.74	0
22108	905.754	21.04	21.04	0
15413	664.509	16.28	16.28	0
8133	286.246	10.39	10.39	0	Monomyristin CollisionEnergy:102040
22070	277.176	21	21	0
14162	611.423	14.7	14.7	0	Ziyuglycoside I
17084	668.654	18.15	18.15	0
16636	979.762	17.6	17.6	0
7274	399.271	9.99	9.99	0
131	290.147	1.92	1.92	0
10683	586.438	11.7	11.7	0	Z17633597
19430	1000.76	19.88	19.88	0
14891	638.468	15.4	15.4	0
2758	396.113	7.18	7.18	0
10307	849.325	11.47	11.47	0
8119	846.755	10.43	10.43	0
2293	309.159	6.99	6.99	0
6185	359.371	9.39	9.39	0
10042	418.25	11.32	11.32	0	Spectral Match to Tributyl phosphate from NIST14
4265	811.312	8.04	8.04	0
21271	949.782	20.77	20.77	0	202821-81-6
8560	846.755	10.56	10.56	0
13626	1034.67	14.12	14.12	0
17230	977.682	18.3	18.3	0
12978	548.426	13.43	13.43	0
16205	503.107	17.16	17.16	0	Contaminants septum vial Thermo C4000-53 and C4000-54 serie
4543	375.178	8.27	8.27	0
10234	473.344	11.44	11.44	0	3,4-dichloro-N'-(3-furylmethylene)-1-benzothiophene-2-carbohydrazide
4345	630.406	8.12	8.12	0
18406	668.654	19.12	19.12	0
16947	984.718	17.92	17.92	0
3937	282.112	7.71	7.71	0	Z1420784330
19816	1759.48	20.11	20.11	0
6860	416.373	9.77	9.77	0
12822	832.241	13.25	13.25	0
9458	928.828	10.96	10.96	0
2073	414.179	6.81	6.81	0	3methyl_pentanoic_acid
10031	531.257	11.31	11.31	0	Z1505983758
19547	923.768	19.94	19.94	0
4406	287.314	8.15	8.15	0	Capensine CollisionEnergy:205060
22647	897.706	21.19	21.19	0	TG(18:1/18:2/18:2); [M+NH4]+ C57H104N1O6
17060	901.586	18.18	18.18	0	TG(18:1/18:1/18:2); [M+NH4]+ C57H106N1O6
1379	211.123	4.71	4.71	0	cyclo(L-Val-L-Pro)
2184	388.154	6.92	6.92	0	Pinaverium
19137	941.774	19.73	19.73	0
7804	330.163	10.22	10.22	0	Massbank:LU052302 Acetyl tributyl citrate|tributyl 2-acetyloxypropane-1,2,3-tricarboxylate
66	232.061	1.81	1.81	0
9149	837.694	10.8	10.8	0
9443	399.366	10.97	10.97	0
18658	355.07	19.36	19.36	0	Candidate Serine-C8:0 (delta mass:126.1053)
22386	634.877	21.1	21.1	0
8594	668.654	10.56	10.56	0
18241	1370.38	18.97	18.97	0
23131	786.603	21.35	21.35	0
22940	315.345	21.39	21.39	0
1324	246.132	3.96	3.96	0	cyclo(L-Phe-D-Pro)
15937	970.74	16.9	16.9	0
18273	1444.4	19.01	19.01	0
19452	625.632	19.89	19.89	0
10313	396.347	11.45	11.45	0
7513	301.216	10.1	10.1	0
11950	946.63	12.53	12.53	0
13906	1035.67	14.39	14.39	0
19694	915.601	20.08	20.08	0
22695	907.715	21.21	21.21	0
14300	1737.5	14.88	14.88	0
17392	858.755	18.41	18.41	0	TG(18:1/18:2/20:4); [M+NH4]+ C59H104N1O6
8034	1170.29	10.34	10.34	0
21928	865.726	20.95	20.95	0
11096	928.827	11.92	11.92	0
14106	611.924	14.67	14.67	0	(E)-3-hydroxy-6-(4-hydroxy-6-methoxy-7-methyl-3-oxo-1H-2-benzofuran-5-yl)-4-methylhex-4-enoic acid
18818	877.726	19.5	19.5	0
11577	909.31	12.28	12.28	0
5	268.132	1.68	1.68	0
14429	1033.67	14.97	14.97	0
20447	1326.9	20.42	20.42	0
2180	365.149	6.92	6.92	0
8656	906.748	10.61	10.61	0
2209	511.255	6.93	6.93	0
18847	668.655	19.48	19.48	0
3528	287.162	7.38	7.38	0
9871	738.409	11.19	11.19	0
18637	577.126	19.35	19.35	0	Baccatin III
9480	423.366	10.98	10.98	0
133	298.096	1.9	1.9	0	METHYLTHIOADENOSINE - 30.0 eV
5284	437.193	8.75	8.75	0	Candidate Serine-C14:1 (delta mass:208.1837)
21223	686.439	20.8	20.8	0
1800	523.218	6.54	6.54	0
2446	245.107	7.05	7.05	0
10049	532.366	11.32	11.32	0
11797	1007.72	12.41	12.41	0
18867	970.739	19.46	19.46	0
4291	220.17	8.07	8.07	0	Candidate 2-phenethylamine-C6:0 (delta mass:98.0729)
4190	422.29	7.97	7.97	0
16177	943.711	17.11	17.11	0
2108	251.107	6.85	6.85	0	Spectral Match to Enterodiol from NIST14
3499	482.15	7.35	7.35	0	2R,3S,4S,5R,6S)-2-[[(2R,3R,4R)-3,4-dihydroxy-4-(hydroxymethyl)oxolan-2-yl]oxymethyl]-6-[4-hydroxy-3-(3-methylbut-2-enyl)phenoxy]oxane-3,4,5-triol
293	267.077	2.04	2.04	0
1604	555.354	6.25	6.25	0
16328	693.53	17.24	17.24	0
9128	901.8	10.82	10.82	0
10753	928.826	11.74	11.74	0
20337	1543.18	20.38	20.38	0
13948	908.258	14.5	14.5	0
8904	603.534	10.71	10.71	0
22351	692.836	21.1	21.1	0
9213	877.725	10.84	10.84	0
13190	473.318	13.61	13.61	0	Spectral Match to Tributyl phosphate from NIST14
23006	737.51	21.28	21.28	0
6393	291.268	9.54	9.54	0	1-(3-Hydroxy-3-methyl-pent-4-enyl)-2,5,5,8a-tetramethyl-decahydro-naphthalen-2-ol
10510	386.362	11.6	11.6	0	N-(5-bromo-1-methyl-4-oxo-1,4-dihydropyridin-3-yl)-3-(propan-2-yloxy)azetidine-1-carboxamide
7680	729.505	10.12	10.12	0
4038	416.205	7.82	7.82	0
8470	872.77	10.54	10.54	0	TG(18:2/18:2/19:0); [M+NH4]+ C58H108N1O6
14770	637.966	15.38	15.38	0
6381	265.252	9.53	9.53	0	PETROSELINIC ACID
3450	953.606	7.34	7.34	0
22649	756.513	21.22	21.22	0
18219	668.654	18.98	18.98	0	EiM07-17243
19850	785.544	20.19	20.19	0
21286	907.76	20.8	20.8	0
18269	936.82	19.01	19.01	0
16889	937.752	17.92	17.92	0
16925	943.711	17.95	17.95	0
20260	1326.9	20.36	20.36	0
2781	267.12	7.18	7.18	0
1060	309.092	3.26	3.26	0
8368	1020.77	10.5	10.5	0
4724	688.449	8.39	8.39	0
18634	638.216	19.35	19.35	0	202821-81-6
9702	378.232	11.11	11.11	0	3,9-Dimethoxypterocarpan
7916	399.366	10.31	10.31	0
1655	227.127	6.37	6.37	0	Spectral Match to Val-Leu from NIST14
12338	832.241	12.85	12.85	0
97	251.046	1.84	1.84	0	Cyclo(his-pro)
16257	1019.69	17.19	17.19	0
3696	268.133	7.47	7.47	0	Spectral Match to Phloretin from NIST14
16089	967.791	17.03	17.03	0
18831	885.715	19.48	19.48	0
4837	397.2	8.5	8.5	0	conocarpan
6253	436.298	9.44	9.44	0	5-[(Z)-14-(3,5-dihydroxyphenyl)tetradec-8-enyl]benzene-1,3-diol
17587	984.718	18.56	18.56	0
13542	1014.67	14.02	14.02	0
14242	977.681	14.81	14.81	0
449	249.157	2.24	2.24	0	1-(4-ethylphenyl)-1H-1,2,3-triazole-4-carboxylic acid
20874	1763.51	20.65	20.65	0
519	267.077	2.27	2.27	0
19601	941.774	19.95	19.95	0
4274	426.137	8.05	8.05	0	Z1169949370
3457	485.289	7.34	7.34	0	GLYCOCHOLATE - 20.0 eV
4048	309.159	7.82	7.82	0	Massbank:WA000022 Iprovalicarb
7702	372.347	10.17	10.17	0
19051	978.759	19.65	19.65	0
16896	979.762	17.92	17.92	0
5604	397.35	8.97	8.97	0	NCGC00385661-01!3,5,7,8-tetramethoxy-2-(3,4,5-trimethoxyphenyl)chromen-4-one
7846	397.382	10.23	10.23	0
8578	399.366	10.54	10.54	0
22326	1168.75	21.1	21.1	0
9813	749.447	11.17	11.17	0
10505	513.506	11.59	11.59	0
21153	350.187	20.76	20.76	0	isobutyl_hexanoate
4795	446.144	8.46	8.46	0	captopril disulfide metabolite (putative)
22773	1347.88	21.21	21.21	0
10901	371.101	11.82	11.82	0	(3S,4R,8R,9E)-10-methyl-5-methylidene-6,14-dioxo-7,13-dioxatricyclo[10.2.1.0?,?]pentadeca-1(15),9-dien-3-yl 2-methylprop-2-enoate
23063	400.379	21.32	21.32	0
2201	282.113	6.96	6.96	0	[4-[3,4,5-trihydroxy-6-(hydroxymethyl)oxan-2-yl]oxyphenyl]methyl 2,3-dihydroxy-2-[(4-hydroxyphenyl)methyl]butanoate
7413	352.339	10.03	10.03	0
21319	920.717	20.82	20.82	0
4277	448.116	8.04	8.04	0
22669	834.753	21.18	21.18	0	MoNA:51221 Triacylglycerol 15:0-16:0-18:1
8501	451.382	10.55	10.55	0
6953	787.207	9.83	9.83	0	PC(15:0/18:3); [M+H]+ C41H77N1O8P1
75	315.095	1.82	1.82	0	5'-Deoxy-5'-(methylsulfinyl)adenosine
7568	979.248	10.13	10.13	0
14077	1013.67	14.64	14.64	0
21889	792.608	20.94	20.94	0	Z17633597
19506	950.798	19.89	19.89	0
18074	905.751	18.88	18.88	0
15454	942.708	16.32	16.32	0
508	259.115	2.34	2.34	0
23106	398.386	21.31	21.31	0
455	459.28	2.31	2.31	0
23073	305.157	21.26	21.26	0
7038	679.322	9.89	9.89	0
12642	474.32	13.06	13.06	0
17104	921.752	18.16	18.16	0
19386	1128.31	19.83	19.83	0
21620	901.798	20.85	20.85	0
20869	686.439	20.62	20.62	0
9819	697.404	11.17	11.17	0	[(2R,3S,4S,5R,6R)-6-[1,7-bis(3,4-dihydroxyphenyl)-5-oxoheptan-3-yl]oxy-3,4,5-trihydroxyoxan-2-yl]methyl (E)-3-(3,4-dimethoxyphenyl)prop-2-enoate
9727	746.492	11.12	11.12	0
2175	338.108	6.91	6.91	0
6749	459.17	9.73	9.73	0
10324	850.327	11.48	11.48	0
7826	228.232	10.23	10.23	0	Spectral Match to Palmitamide from NIST14
12612	832.241	13.05	13.05	0
8279	372.347	10.41	10.41	0	6,10a-dihydroxy-4-(hydroxymethyl)-4,7,11b-trimethyl-1,2,3,4a,5,6,6a,7,11,11a-decahydronaphtho[2,1-f][1]benzofuran-9-one
10097	381.355	11.36	11.36	0	(3S,4R,8R,9E)-10-methyl-5-methylidene-6,14-dioxo-7,13-dioxatricyclo[10.2.1.0?,?]pentadeca-1(15),9-dien-3-yl 2-methylprop-2-enoate
22319	896.798	21.1	21.1	0
16111	696.008	17.1	17.1	0
23394	281.861	21.52	21.52	0
11036	399.366	11.89	11.89	0
5646	1022.51	9	9	0
7334	647.297	10.02	10.02	0
21942	851.712	20.96	20.96	0
5959	639.19	9.23	9.23	0
4966	206.084	8.6	8.6	0
1301	567.431	3.92	3.92	0
5724	301.293	9.07	9.07	0
7898	339.345	10.29	10.29	0
22959	711.494	21.28	21.28	0
15083	927.725	15.78	15.78	0
299	235.107	2.12	2.12	0	ReSpect:PM014406 Cyclo(Phe-Tyr)
7757	283.175	10.2	10.2	0	Oxandrolone_CE30
21651	895.717	20.93	20.93	0	202821-81-6
2249	428.149	6.96	6.96	0
10375	928.827	11.54	11.54	0
16819	943.711	17.86	17.86	0
9656	570.457	11.09	11.09	0
4003	616.39	7.78	7.78	0
21175	905.751	20.77	20.77	0
13395	568.566	13.91	13.91	0
18694	631.113	19.35	19.35	0	ganoderic acid I
1621	577.367	6.3	6.3	0
3633	412.154	7.44	7.44	0
13727	568.566	14.23	14.23	0
4554	329.005	8.28	8.28	0
5395	287.314	8.84	8.84	0
17344	1737.5	18.4	18.4	0
7693	352.339	10.16	10.16	0
18027	625.632	18.84	18.84	0
17256	668.654	18.3	18.3	0
20876	1789.52	20.66	20.66	0
19745	1541.17	20.15	20.15	0
5567	305.284	8.93	8.93	0	Retinoic acid CollisionEnergy:205060
9490	746.564	10.99	10.99	0
22065	218.108	20.96	20.96	0
16663	668.654	17.66	17.66	0
6303	551.503	9.48	9.48	0
3928	512.254	7.69	7.69	0
1478	203.118	5.86	5.86	0	tryptamine-C17:0
15068	597.601	15.75	15.75	0	methyl 2-[(3-ethoxy-4-propoxyphenyl)methylene]-3-oxobenzo[b]furan-5-carboxylat e CollisionEnergy:102040
8316	399.366	10.47	10.47	0
10549	226.18	11.62	11.62	0	Spectral Match to 1,11-Undecanedicarboxylic acid from NIST14
17923	625.632	18.76	18.76	0
16453	1763.51	17.46	17.46	0
7296	674.505	10	10	0
10702	708.511	11.7	11.7	0
21266	905.753	20.82	20.82	0
5654	603.534	9	9	0
19707	1569.2	20.12	20.12	0
9715	644.369	11.11	11.11	0
6329	383.367	9.55	9.55	0	Massbank:PR310745 Caffeoyl quinic acid
757	565.362	2.81	2.81	0	Spectral Match to Undecaethylene glycol from NIST14
15406	665.011	16.28	16.28	0
21256	708.512	20.83	20.83	0
15080	597.601	15.81	15.81	0	methyl 2-[(3-ethoxy-4-propoxyphenyl)methylene]-3-oxobenzo[b]furan-5-carboxylat e CollisionEnergy:102040
9711	720.467	11.11	11.11	0
18375	1130.31	19.08	19.08	0
1054	332.108	3.26	3.26	0
11424	1047.65	12.14	12.14	0
13772	685.435	14.26	14.26	0
22814	664.457	21.27	21.27	0	Sarmentoside B
1435	244.008	5.41	5.41	0	Benzocaine - 40.0 eV
15184	927.725	15.93	15.93	0
19180	950.798	19.75	19.75	0
11585	910.312	12.27	12.27	0
11991	339.345	12.54	12.54	0	Spectral Match to 9-Octadecenamide, (Z)- from NIST14
11511	834.24	12.21	12.21	0
8957	900.795	10.76	10.76	0	TG(16:0/18:1/18:1); [M+NH4]+ C55H106N1O6
18903	1130.31	19.56	19.56	0
21051	708.512	20.72	20.72	0
4084	302.081	7.86	7.86	0
8315	734.568	10.47	10.47	0
5644	360.207	9	9	0	Massbank:AU581151 Bisphenol A (3-chloro-2-hydroxypropyl) glycidyl ether|Bisphenol A (3-chloro-2-hydroxypropyl)glycidyl ether|1-chloro-3-[4-[2-[4-(oxiran-2-ylmethoxy)phenyl]propan-2-yl]phenoxy]propan-2-ol
9310	359.204	10.88	10.88	0	Massbank:AU581151 Bisphenol A (3-chloro-2-hydroxypropyl) glycidyl ether|Bisphenol A (3-chloro-2-hydroxypropyl)glycidyl ether|1-chloro-3-[4-[2-[4-(oxiran-2-ylmethoxy)phenyl]propan-2-yl]phenoxy]propan-2-ol
5563	317.284	8.93	8.93	0	Massbank:FFF00039 Cholestanol
19494	1130.31	19.88	19.88	0
464	433.283	2.25	2.25	0
21746	940.764	20.89	20.89	0
23439	312.859	21.56	21.56	0
23434	316.851	21.55	21.55	0
8036	644.371	10.35	10.35	0
18750	625.632	19.43	19.43	0
4508	276.196	8.25	8.25	0
13431	777.233	13.91	13.91	0
8412	737.508	10.51	10.51	0
5648	760.583	8.99	8.99	0
14815	597.601	15.4	15.4	0
15945	965.783	16.92	16.92	0
9358	749.448	10.94	10.94	0
15352	1019.69	16.25	16.25	0
6527	533.388	9.62	9.62	0	Spectral Match to p-tert-Octylphenol heptaglycol ether from NIST14
22367	828.812	21.11	21.11	0
10155	708.511	11.38	11.38	0
18288	950.728	19.01	19.01	0
8716	452.394	10.65	10.65	0	Polidocanol
12840	474.321	13.25	13.25	0
13055	442.301	13.52	13.52	0	202821-81-6
7779	404.236	10.22	10.22	0	Massbank:LU052302 Acetyl tributyl citrate|tributyl 2-acetyloxypropane-1,2,3-tricarboxylate
8744	770.376	10.66	10.66	0
22872	286.31	21.26	21.26	0
16990	668.654	18.09	18.09	0
5063	266.117	8.66	8.66	0
18442	1737.5	19.16	19.16	0
6483	374.352	9.59	9.59	0	STROBILACTONE A
14282	927.725	14.86	14.86	0
7841	317.284	10.23	10.23	0
9167	923.768	10.87	10.87	0
8753	778.483	10.66	10.66	0
3367	250.143	7.3	7.3	0	Candidate Tyramine-C2:0 (delta mass:42.0106)
15309	942.708	16.24	16.24	0
14683	993.742	15.21	15.21	0
17324	625.632	18.36	18.36	0	Z998574470
5716	333.334	9.06	9.06	0	[9b-hydroxy-6-(hydroxymethyl)-6,9a-dimethyl-3-oxo-1,3a,4,5,5a,7,8,9-octahydrobenzo[e][2]benzofuran-5-yl] benzoate
1634	255.065	6.32	6.32	0
6379	397.292	9.53	9.53	0
10936	1009.66	11.83	11.83	0	Pinaverium
339	249.157	2.13	2.13	0	6-oxo-3-phenylpiperidine-3-carboxylic acid
8693	714.41	10.63	10.63	0
209	372.259	2	2	0	cyclo(tyrosyl-prolyl)
8696	679.418	10.63	10.63	0
19596	915.601	20	20	0
4295	306.279	8.08	8.08	0	Remodelin
8748	733.423	10.66	10.66	0
16011	341.361	17.07	17.07	0	furfuryl_3_methylbutanoate
20317	905.753	20.46	20.46	0
11775	415.188	12.35	12.35	0	N-[2-(2-methoxyphenoxy)ethyl]-N-methyl-2-oxo-1,2-dihydroquinoline-4-carboxamide
7882	395.334	10.26	10.26	0	Asp-C22:1
13549	906.259	14.08	14.08	0
22517	650.851	21.16	21.16	0
7484	772.586	10.06	10.06	0	SM(d18:2/18:1); [M+H]+ C41H80N2O6P1
1328	567.431	3.96	3.96	0
20131	913.747	20.42	20.42	0	202821-81-6
19272	872.771	19.76	19.76	0	TG(14:1/14:1/18:2); [M+NH4]+ C49H90N1O6
22082	711.494	20.99	20.99	0
1995	322.118	6.75	6.75	0	Phloretin
10543	672.525	11.62	11.62	0
6497	293.175	9.6	9.6	0	benzoic_acid
3909	362.326	7.66	7.66	0
12903	1012.68	13.35	13.35	0
5631	683.348	9	9	0
9070	737.509	10.79	10.79	0
3329	430.121	7.3	7.3	0	Asp-CA
10613	545.402	11.66	11.66	0
14926	908.258	15.52	15.52	0
14152	1013.67	14.74	14.74	0	202821-81-6
2719	284.092	7.16	7.16	0
16873	1000.69	17.91	17.91	0
9065	1020.77	10.81	10.81	0
5444	420.174	8.87	8.87	0	Guanosine cyclic monophosphate
5054	326.15	8.66	8.66	0
8692	469.392	10.63	10.63	0	Polidocanol
18506	1134.27	19.27	19.27	0
11165	835.24	11.97	11.97	0
9646	699.523	11.08	11.08	0	Spectral Match to Myristic acid ethyl ester from NIST14
9264	570.457	10.89	10.89	0
16641	999.693	17.6	17.6	0
4361	348.29	8.12	8.12	0
15824	1763.51	16.83	16.83	0
5059	655.44	8.64	8.64	0
21222	940.763	20.75	20.75	0
13847	448.35	14.35	14.35	0
10310	394.209	11.47	11.47	0	2,3-dihydroxypropyl stearate
22670	955.737	21.21	21.21	0
6506	418.107	9.6	9.6	0
10146	354.336	11.38	11.38	0
10530	664.338	11.65	11.65	0	Sarmentoside B
5367	658.437	8.82	8.82	0
13776	891.741	14.27	14.27	0
6273	454.327	9.44	9.44	0
8414	337.329	10.51	10.51	0	Spectral Match to 9-Octadecenamide, (Z)- from NIST14
22545	378.901	21.17	21.17	0
17401	977.683	18.42	18.42	0
8668	872.77	10.63	10.63	0	TG(15:0/18:2/18:2); [M+NH4]+ C54H100N1O6
414	249.123	2.25	2.25	0	1-(4-ethylphenyl)-1H-1,2,3-triazole-4-carboxylic acid
1717	300.134	6.45	6.45	0
4251	224.107	8.03	8.03	0
14086	608.945	14.67	14.67	0
18747	877.725	19.4	19.4	0
20233	1348.88	20.37	20.37	0
22046	837.696	21.05	21.05	0
22344	626.846	21.1	21.1	0
4833	460.269	8.5	8.5	0	glycodeoxycholic acid (Chimeric precursor selection)
7937	380.103	10.29	10.29	0	STL461418
10471	474.313	11.53	11.53	0	OUABAIN
19313	908.764	19.77	19.77	0
20621	686.439	20.47	20.47	0
5650	363.157	9	9	0	5_methoxy_tryptophol
6988	299.273	9.85	9.85	0	Sclareol
3491	475.048	7.35	7.35	0	(2R,2'S,4'aS,5'R,5''S,6'R,8'aS)-2'-(acetyloxy)-5''-(furan-3-yl)-6'-methyl-2'',8'-dioxo-octahydrodispiro[oxirane-2,1'-naphthalene-5',3''-oxolane]-8'a-ylmethyl acetate
22978	382.201	21.36	21.36	0	Z2109700551
4864	601.399	8.52	8.52	0
23142	663.454	21.33	21.33	0	Sarmentoside B
9437	905.751	10.98	10.98	0
22225	375.25	21.08	21.08	0
9332	482.405	10.93	10.93	0	MoNA:2285467 D-Galactaric acid
7381	399.357	10.03	10.03	0
15934	906.259	16.92	16.92	0
7343	476.251	10.02	10.02	0	MLS001076852-01!
20863	923.767	20.63	20.63	0
7311	605.478	10.02	10.02	0
3250	385.092	7.31	7.31	0
8475	908.791	10.55	10.55	0
6908	302.144	9.8	9.8	0
9793	926.819	11.17	11.17	0	202821-81-6
8677	496.421	10.63	10.63	0	Polidocanol
1811	334.155	6.56	6.56	0	NCGC00384902-01_C22H20N4O2_3,6-Bis(1H-indol-3-ylmethyl)-2,5-piperazinedione
6089	595.164	9.33	9.33	0
17560	970.739	18.54	18.54	0
7016	304.183	9.88	9.88	0
185	228.134	1.98	1.98	0	2034582-82-4
8732	386.295	10.65	10.65	0	5_metoxy_tryptamine
17287	970.739	18.35	18.35	0
9661	761.484	11.19	11.19	0
5152	780.629	8.71	8.71	0
7459	733.557	10.05	10.05	0
601	459.28	2.42	2.42	0	Spectral Match to Undecaethylene glycol from NIST14
11707	886.783	12.36	12.36	0	TG(15:0/18:2/18:2); [M+NH4]+ C54H100N1O6
7874	383.204	10.2	10.2	0	Chlorogenic acid - 30.0 eV
13389	906.259	13.81	13.81	0
15612	300.061	16.56	16.56	0
21907	736.544	20.94	20.94	0
19690	1567.19	20.1	20.1	0
19367	895.738	19.84	19.84	0
9706	719.464	11.11	11.11	0	[(2R,3S,4S,5R,6R)-6-[1,7-bis(3,4-dihydroxyphenyl)-5-oxoheptan-3-yl]oxy-3,4,5-trihydroxyoxan-2-yl]methyl (E)-3-(3,4-dimethoxyphenyl)prop-2-enoate
22352	1110.79	21.1	21.1	0
2739	422.207	7.17	7.17	0
286	371.227	2.1	2.1	0	Spectral Match to Hexaethylene glycol from NIST14
20049	1569.2	20.26	20.26	0
7803	405.238	10.22	10.22	0	MLS001142935
21761	929.759	20.93	20.93	0
21535	877.726	20.86	20.86	0
6564	471.331	9.64	9.64	0	Spectral Match to p-tert-Octylphenol heptaglycol ether from NIST14
10627	496.42	11.66	11.66	0
4516	312.188	8.26	8.26	0	2'-Hydroxy-a-naphthoflavone CollisionEnergy:102040
673	477.309	2.51	2.51	0	Spectral Match to Undecaethylene glycol from NIST14
20324	908.765	20.42	20.42	0
19390	955.756	19.83	19.83	0
7785	448.29	10.22	10.22	0
9129	918.811	10.84	10.84	0
15656	970.739	16.63	16.63	0
3402	338.256	7.34	7.34	0	Spectral Match to Cytidine 5'-diphosphocholine from NIST14
20687	625.632	20.56	20.56	0
592	477.309	2.4	2.4	0	Spectral Match to Undecaethylene glycol from NIST14
8761	364.342	10.67	10.67	0	Massbank:AU406506 3,6,9,12-Tetraoxatetracosan-1-ol|Tetraethylene glycol monododecyl ether|2-[2-[2-(2-dodecoxyethoxy)ethoxy]ethoxy]ethanol
21533	711.493	20.89	20.89	0
7575	687.459	10.09	10.09	0
2448	550.214	7.07	7.07	0
9403	877.725	10.94	10.94	0
21236	893.699	20.79	20.79	0
4828	408.347	8.5	8.5	0
7983	559.439	10.32	10.32	0
13162	1035.67	13.57	13.57	0
9994	685.435	11.28	11.28	0
22137	473.215	21.05	21.05	0	Febuxostat
3308	669.576	7.27	7.27	0
7391	757.543	10.04	10.04	0	PC(18:1_18:2) - trimethyl(2-{[3-[octadec-11-enoyloxy]-2-[octadeca-9.12-dienoyloxy]propyl phosphonato]oxy}ethyl)azanium
4937	556.369	8.58	8.58	0
11980	603.472	12.54	12.54	0	Z17633597
22314	851.712	21.08	21.08	0
4469	346.332	8.21	8.21	0
6792	647.297	9.76	9.76	0
1897	296.148	6.66	6.66	0	Amoxicilin - Dark Web Drugs
3229	309.159	7.22	7.22	0
10822	415.188	11.77	11.77	0
3656	627.333	7.45	7.45	0
10063	894.654	11.33	11.33	0
16157	937.752	17.11	17.11	0
17220	1737.5	18.26	18.26	0
11684	872.77	12.31	12.31	0	TG(18:2/18:2/19:0); [M+NH4]+ C58H108N1O6
11909	392.287	12.49	12.49	0	5-(1,3-benzothiazol-2-ylamino)-3-benzyl-5-(trifluoromethyl)-2,4-imidazolidinedione
7912	648.301	10.28	10.28	0	Massbank:LQA00221 PE(16:1e/20-HETE)
21248	874.782	20.79	20.79	0	TG(12:0/14:0/18:1); [M+NH4]+ C47H92N1O6
23763	276.897	23.39	23.39	0
9999	418.329	11.28	11.28	0
8795	760.585	10.65	10.65	0
15515	597.601	16.41	16.41	0
2288	203.118	6.99	6.99	0	tryptamine-C19:0
8136	303.253	10.39	10.39	0
4443	262.18	8.18	8.18	0
12991	835.24	13.41	13.41	0
8740	1785.5	10.65	10.65	0
9718	701.434	11.11	11.11	0
6287	257.211	9.46	9.46	0	Monomyristin CollisionEnergy:102040
21254	897.753	20.77	20.77	0	TG(18:1/18:2/18:2); [M+NH4]+ C57H104N1O6
5328	732.554	8.83	8.83	0
5961	622.163	9.23	9.23	0
5097	833.66	8.66	8.66	0
18520	625.632	19.23	19.23	0
21303	837.695	20.83	20.83	0
19264	1370.38	19.8	19.8	0
2469	245.038	7.05	7.05	0
6334	387.366	9.51	9.51	0
3979	229.043	7.76	7.76	0	Candidate Tryptamine-C16:0 (delta mass:238.2273)
4873	360.134	8.53	8.53	0	(Indoline-1-carbonyl)-L-leucine
222	371.227	2.06	2.06	0	Spectral Match to Hexaethylene glycol from NIST14
3506	345.181	7.38	7.38	0
22357	624.848	21.1	21.1	0
9487	1785.49	10.99	10.99	0
4911	293.194	8.56	8.56	0
4815	512.342	8.48	8.48	0
13344	907.26	13.8	13.8	0
11578	911.308	12.28	12.28	0
16895	980.764	17.92	17.92	0
4137	338.296	7.91	7.91	0
21698	973.739	20.92	20.92	0
14164	609.447	14.65	14.65	0
8691	451.363	10.63	10.63	0	Polidocanol
11182	832.241	12	12	0
9336	872.77	10.91	10.91	0	TG(16:0/18:1/18:2); [M+NH4]+ C55H104N1O6
18627	1737.5	19.33	19.33	0
4947	851.405	8.59	8.59	0
6059	591.534	9.29	9.29	0
2702	309.159	7.15	7.15	0
15572	664.509	16.49	16.49	0
16834	682.574	17.82	17.82	0
18866	1759.48	19.5	19.5	0
11440	928.826	12.13	12.13	0
23441	314.855	21.56	21.56	0
17730	970.739	18.61	18.61	0
15479	927.725	16.37	16.37	0
4418	320.295	8.16	8.16	0
7115	760.583	9.97	9.97	0	Spectral Match to 1-Myristoyl-2-palmitoyl-sn-glycero-3-phosphocholine from NIST14
7737	239.149	10.21	10.21	0	Ethyl_caffeate
6091	578.137	9.33	9.33	0
9380	754.404	10.95	10.95	0
3454	319.242	7.34	7.34	0
18075	907.763	18.91	18.91	0
11876	540.534	12.53	12.53	0
16319	519.138	17.24	17.24	0
10296	848.33	11.48	11.48	0
20473	1759.48	20.5	20.5	0
9735	354.336	11.13	11.13	0
9326	916.797	10.89	10.89	0
12584	835.24	13.04	13.04	0
17315	984.718	18.26	18.26	0
1051	212.141	3.26	3.26	0	Massbank:PR300811 Cyclo(proline-leucine)
5836	772.586	9.16	9.16	0
20782	1128.31	20.6	20.6	0
11954	362.196	12.54	12.54	0	5_methoxy_tryptophol
3950	245.267	7.72	7.72	0
7253	784.587	10	10	0
1159	255.17	3.44	3.44	0	METHYL INDOLE-3-ACETATE
11961	418.258	12.53	12.53	0	N-(2,2-dimethyl-1-phenylpropyl)-6-oxo-1,6-dihydropyridine-2-carboxamide
5066	677.421	8.66	8.66	0
9120	702.537	10.83	10.83	0
17643	965.783	18.56	18.56	0
903	454.347	3.02	3.02	0
8818	399.366	10.72	10.72	0
14119	1194.9	14.69	14.69	0
4438	303.309	8.18	8.18	0
15345	666.987	16.24	16.24	0
11125	663.335	11.89	11.89	0	Spectral Match to Tributyl phosphate from NIST14
144	321.131	1.92	1.92	0
18653	611.184	19.36	19.36	0	Baccatin III
15752	970.739	16.73	16.73	0
15494	366.373	16.36	16.36	0	Z2229831406
20691	905.752	20.62	20.62	0
11689	341.305	12.34	12.34	0	GLYCEROL-MYRISTATE
13894	1034.67	14.35	14.35	0
10048	519.37	11.32	11.32	0
12617	518.375	13.07	13.07	0
14209	689.157	14.79	14.79	0
22299	694.833	21.1	21.1	0
6223	250.188	9.42	9.42	0	Tebuthiuron_CE30
7014	314.167	9.88	9.88	0
16226	341.361	17.14	17.14	0	AKOS017817170
9583	696.399	11.07	11.07	0
5605	786.601	9	9	0
2237	490.161	6.96	6.96	0
4419	273.262	8.16	8.16	0
7969	668.654	10.31	10.31	0
10820	717.457	11.75	11.75	0
20174	1759.48	20.41	20.41	0
8520	893.699	10.57	10.57	0
16600	943.711	17.54	17.54	0
9816	734.456	11.17	11.17	0
10008	313.273	11.29	11.29	0	Spectral Match to Glycerol 1-myristate from NIST14
12211	705.211	12.73	12.73	0
827	476.328	2.93	2.93	0	Spectral Match to Undecaethylene glycol from NIST14
12409	1021.78	12.89	12.89	0
21157	388.254	20.75	20.75	0
1454	248.147	5.57	5.57	0	cyclo-(Val-Phe)
18779	970.739	19.42	19.42	0
23121	599.504	21.34	21.34	0	Panaxatriol
17148	970.739	18.22	18.22	0
17410	668.654	18.42	18.42	0
19018	965.782	19.57	19.57	0
5833	716.523	9.15	9.15	0
12046	1015.7	12.6	12.6	0
12271	949.658	12.81	12.81	0	202821-81-6
22524	718.838	21.16	21.16	0
5056	327.153	8.66	8.66	0	(2S,3R,4S,5S,6R)-2-[4-[(E)-2-(3,5-dihydroxyphenyl)ethenyl]-2-methoxyphenoxy]-6-(hydroxymethyl)oxane-3,4,5-triol
19130	1759.48	19.73	19.73	0
14442	685.203	14.91	14.91	0
6140	642.342	9.36	9.36	0
7410	400.378	10	10	0	aminoadipic acid-C18:0
3277	645.826	7.3	7.3	0
6380	339.289	9.53	9.53	0	Spectral Match to 9-Octadecenamide, (Z)- from NIST14
6910	307.119	9.8	9.8	0	3_hydroxy_glutaric_acid
10119	763.463	11.37	11.37	0
4656	261.102	8.35	8.35	0
8298	706.538	10.46	10.46	0
3963	289.097	7.74	7.74	0
22530	514.875	21.16	21.16	0
20318	625.632	20.43	20.43	0
23769	264.873	23.46	23.46	0
5613	345.319	8.99	8.99	0	STROBILACTONE A
2532	456.192	7.06	7.06	0
22709	929.719	21.2	21.2	0
8118	708.513	10.41	10.41	0
2185	387.131	6.92	6.92	0
8702	425.366	10.64	10.64	0	3-hydroxyhexadecanoyl glutamic acid [M+Na]+
4436	426.134	8.16	8.16	0
2861	273.033	7.23	7.23	0	1-(2-hydroxy-5-methylbenzoyl)piperidine-4-carboxylic acid
15526	1014.74	16.47	16.47	0
19868	1562.23	20.2	20.2	0
13466	685.435	13.94	13.94	0
7246	599.503	10.02	10.02	0
9138	987.464	10.84	10.84	0
6041	376.096	9.29	9.29	0
8718	711.492	10.62	10.62	0
22717	299.102	21.21	21.21	0
4483	290.175	8.21	8.21	0
5645	383.204	9	9	0	Chlorogenic acid - 30.0 eV
5564	387.192	8.93	8.93	0	Massbank: Cholesterol
4518	499.33	8.26	8.26	0	Spectral Match to Octapropylene glycol from NIST14
12042	1012.68	12.54	12.54	0
10728	923.767	11.75	11.75	0
4620	393.286	8.32	8.32	0	Asperuloside
11183	918.811	11.95	11.95	0
3889	276.28	7.58	7.58	0
7970	760.585	10.31	10.31	0
3949	298.143	7.72	7.72	0
7538	591.43	10.12	10.12	0
21531	1733.46	20.81	20.81	0
19812	664.456	20.18	20.18	0	Sarmentoside B
15570	942.708	16.49	16.49	0
21343	283.175	20.73	20.73	0
22239	371.163	21.09	21.09	0
8745	777.48	10.66	10.66	0
8706	397.35	10.64	10.64	0	Asp-C22:1
12069	540.534	12.62	12.62	0
4380	517.212	8.14	8.14	0
7784	269.138	10.22	10.22	0	Massbank:AU250106 Octocrylene|2-ethylhexyl 2-cyano-3,3-diphenylprop-2-enoate
13514	1137.86	14	14	0
4851	417.217	8.5	8.5	0	PAEDEROSIDE
22488	305.157	21.12	21.12	0
11706	834.755	12.34	12.34	0
5562	375.287	8.93	8.93	0
22592	869.699	21.2	21.2	0
21473	481.262	20.84	20.84	0
13392	354.336	13.79	13.79	0
14323	1033.67	14.86	14.86	0
7337	664.274	10.02	10.02	0
7348	578.522	10.02	10.02	0
18084	668.654	18.88	18.88	0
6326	786.602	9.51	9.51	0
3544	312.159	7.39	7.39	0
21898	686.44	20.96	20.96	0
19729	764.574	20.18	20.18	0
5555	353.305	8.93	8.93	0
1568	489.234	6.16	6.16	0	Massbank:RP007501 Lithocholenic Acid|AC1N11MC|4-(3-hydroxy-10,13-dimethyl-2,3,4,5,6,7,8,9,14,15,16,17-dodecahydro-1H-cyclopenta[a]phenanthren-17-yl)pentanoic acid
4482	259.282	8.22	8.22	0
14481	998.697	14.97	14.97	0
7905	643.345	10.28	10.28	0	Massbank:AU581152 Bisphenol A (3-chloro-2-hydroxypropyl) glycidyl ether|Bisphenol A (3-chloro-2-hydroxypropyl)glycidyl ether|1-chloro-3-[4-[2-[4-(oxiran-2-ylmethoxy)phenyl]propan-2-yl]phenoxy]propan-2-ol
5184	348.326	8.72	8.72	0
16260	693.53	17.2	17.2	0
22693	867.685	21.21	21.21	0
14103	611.423	14.63	14.63	0	(E)-3-hydroxy-6-(4-hydroxy-6-methoxy-7-methyl-3-oxo-1H-2-benzofuran-5-yl)-4-methylhex-4-enoic acid
13912	993.742	14.43	14.43	0
594	202.083	2.43	2.43	0
22337	857.517	21.09	21.09	0
8736	903.74	10.69	10.69	0
20006	1541.17	20.21	20.21	0
10108	400.368	11.36	11.36	0	aminoadipic acid-C18:0
232	216.102	2.04	2.04	0	Palonosetron_20eV
3999	263.164	7.78	7.78	0	Z1550477595
7618	547.403	10.14	10.14	0
14548	998.697	15.03	15.03	0
10347	628.499	11.5	11.5	0
4862	686.3	8.52	8.52	0
15985	943.711	17.05	17.05	0
4898	337.248	8.56	8.56	0
6699	372.101	9.72	9.72	0
12870	518.375	13.32	13.32	0
6578	445.335	9.65	9.65	0	Spectral Match to p-tert-Octylphenol pentaglycol ether from NIST14
11960	947.634	12.53	12.53	0
18019	950.728	18.83	18.83	0
8738	364.313	10.65	10.65	0	Massbank:AU406506 3,6,9,12-Tetraoxatetracosan-1-ol|Tetraethylene glycol monododecyl ether|2-[2-[2-(2-dodecoxyethoxy)ethoxy]ethoxy]ethanol
4846	438.197	8.5	8.5	0
4028	572.364	7.81	7.81	0
20870	897.753	20.65	20.65	0	TG(18:1/18:2/18:2); [M+NH4]+ C57H104N1O6
57	210.079	1.8	1.8	0	Massbank:KO002100 5-Aminoindole|1H-indol-5-amine|Indol-5-ylamine
22446	832.74	21.14	21.14	0	TG(16:0/18:1/18:2); [M+NH4]+ C55H104N1O6
23687	379.131	21.95	21.95	0	sebacic_acid
17200	970.739	18.28	18.28	0
14816	906.259	15.41	15.41	0
15881	970.739	16.84	16.84	0
18138	979.763	18.93	18.93	0
8551	921.73	10.58	10.58	0
13910	998.697	14.41	14.41	0
16760	625.632	17.77	17.77	0
5258	304.097	8.74	8.74	0	Massbank:PR304220 Indole-3-acetyl-L-alanine
4494	390.357	8.23	8.23	0
5925	468.376	9.2	9.2	0
4617	454.301	8.32	8.32	0
8561	730.539	10.55	10.55	0
6719	289.252	9.72	9.72	0	Colladonine
10556	228.196	11.62	11.62	0	MUCIC ACID
7554	389.397	10.13	10.13	0
16699	503.107	17.69	17.69	0
6348	388.369	9.51	9.51	0
3098	640.391	7.27	7.27	0
565	541.262	2.49	2.49	0
5093	556.188	8.67	8.67	0
9671	519.138	11.1	11.1	0
14937	852.25	15.53	15.53	0
21816	418.329	20.97	20.97	0	1-(2-fluorophenyl)-5-(trifluoromethyl)-1H-pyrazole-4-carboxylic acid
2692	626.33	7.14	7.14	0
21028	913.746	20.69	20.69	0
21861	441.298	20.95	20.95	0	13-Hydroxylupanine_CE15
9576	674.416	11.04	11.04	0	NCGC00384692-01_C32H42O17_beta-D-Glucopyranoside, 6-[[6-deoxy-3-O-[(2E)-3-(3,4-dimethoxyphenyl)-1-oxo-2-propen-1-yl]-alpha-L-mannopyranosyl]oxy]-1a,1b,2,5a,6,6a-hexahydro-1a-(hydroxymethyl)oxireno[4,5]cyclopenta[1,2-c]pyran-2-yl
4083	268.097	7.85	7.85	0	Hyperoside
4181	408.123	7.96	7.96	0
23004	409.183	21.27	21.27	0	N-[2-(2-methoxyphenoxy)ethyl]-N-methyl-2-oxo-1,2-dihydroquinoline-4-carboxamide
4793	430.121	8.46	8.46	0
17707	956.687	18.63	18.63	0
358	415.253	2.18	2.18	0	Spectral Match to Nonaethylene glycol from NIST14
21146	942.779	20.74	20.74	0
16064	625.632	17.07	17.07	0
61	574.177	1.8	1.8	0
13456	676.679	13.94	13.94	0
9169	399.308	10.85	10.85	0
3408	282.112	7.27	7.27	0
12911	420.319	13.39	13.39	0
17129	879.737	18.17	18.17	0
14136	998.697	14.71	14.71	0
8855	916.796	10.7	10.7	0
7797	881.758	10.25	10.25	0
5966	358.144	9.23	9.23	0	Massbank:AU581051 Bisphenol A diglycidyl ether|2-[[4-[2-[4-(oxiran-2-ylmethoxy)phenyl]propan-2-yl]phenoxy]methyl]oxirane
4546	268.133	8.27	8.27	0	Spectral Match to Phloretin from NIST14
7721	761.589	10.17	10.17	0
18989	970.739	19.59	19.59	0
23196	403.398	21.36	21.36	0
10588	584.473	11.64	11.64	0
13488	1522.38	13.98	13.98	0
8628	557.445	10.59	10.59	0	Spectral Match to Nonaethylene glycol from NIST14
4555	412.321	8.28	8.28	0
702	521.336	2.67	2.67	0	Spectral Match to Undecaethylene glycol from NIST14
13297	1011.67	13.68	13.68	0
22642	886.788	21.22	21.22	0
21015	1342.92	20.66	20.66	0
18538	965.782	19.23	19.23	0
8650	495.387	10.61	10.61	0	Polidocanol
21855	711.494	20.95	20.95	0
13415	998.697	13.89	13.89	0
21061	896.741	20.69	20.69	0
13650	1014.67	14.14	14.14	0
3964	391.331	7.74	7.74	0	kaempferol 7-O-glucoside
21578	686.44	20.89	20.89	0
14416	597.601	15.01	15.01	0	Z998574470
191	249.157	2.04	2.04	0
22315	964.786	21.11	21.11	0
10182	391.244	11.41	11.41	0
22146	792.608	21.06	21.06	0	Z17633597
22580	666.824	21.18	21.18	0
18693	1134.27	19.38	19.38	0
19312	874.782	19.82	19.82	0	TG(16:0/18:0/18:1); [M+NH4]+ C55H108N1O6
6582	427.305	9.66	9.66	0	Spectral Match to p-tert-Octylphenol pentaglycol ether from NIST14
17783	879.737	18.69	18.69	0
7405	586.452	10.05	10.05	0
20151	1449.36	20.41	20.41	0	202821-81-6
9864	832.241	11.17	11.17	0
9873	708.511	11.19	11.19	0
[truncated: 2,320 more rows]

## Sheet: Table S3
Table S3 Sirius-based feature classifications and bioactivity based molecular networking correlations.
FeatureID	FBMNcomponent	correlation	p_value_Bfcor	ionMass	retentionTimeInMinutes	formulaRank	molecularFormula	adduct	precursorFormula	NPC#pathway	NPC#pathway Probability	NPC#superclass	NPC#superclass Probability	NPC#class	NPC#class Probability	ClassyFire#superclass	ClassyFire#superclass probability	ClassyFire#class	ClassyFire#class Probability	ClassyFire#subclass	ClassyFire#subclass Probability	ClassyFire#level 5	ClassyFire#level 5 Probability	ClassyFire#most specific class	ClassyFire#most specific class Probability	ClassyFire#all classifications		retentionTimeInSeconds	formulaId	alignedFeatureId
1364	28	0.900003	0.00427843	275.118	4.398	1	C18H14N2O	[M + H]+	C18H15N2O+	Alkaloids	0.934	Tryptophan alkaloids	0.481	Carboline alkaloids	0.079	Organoheterocyclic compounds	0.997	Azoles	0.841	Imidazoles	0.881	Substituted imidazoles	0.824	Phenylimidazoles	0.579	Organic compounds; Organoheterocyclic compounds; Imidazoles; Phenols; Organonitrogen compounds; Benzimidazoles; Organooxygen compounds; Azoles; Benzene and substituted derivatives; Substituted imidazoles; N-substituted imidazoles; Phenylimidazoles; Benzenoids; Amines; Azacyclic compounds; Heteroaromatic compounds; Hydrocarbon derivatives; Organopnictogen compounds; Organic oxygen compounds; 1-hyd…		264	742888223248364418	735853454099356459
1515	-1	0.947786	2.76e-05	407.175	5.979	1	C27H22N2O2	[M + H]+	C27H23N2O2+	Alkaloids	0.963	Tryptophan alkaloids	0.881	Hapalindole alkaloids	0.178	Organoheterocyclic compounds	0.948	Indoles and derivatives	0.511					Indoles and derivatives	0.511	Organic compounds; Organoheterocyclic compounds; Alkyl aryl ethers; Indoles and derivatives; Ethers; Organonitrogen compounds; Organooxygen compounds; Benzene and substituted derivatives; Benzenoids; Amines; Secondary alkylarylamines; Aralkylamines; Organic oxides; Azacyclic compounds; Heteroaromatic compounds; Hydrocarbon derivatives; Organopnictogen compounds; Organic oxygen compounds; Organic …		359	742822968229963711	735853551780506701
1635	-1	0.911504	0.00167088	469.176	6.32	1	C28H24N2O5	[M + H]+	C28H25N2O5+	Alkaloids	0.716	Tryptophan alkaloids	0.407	Acridone alkaloids	0.05	Organoheterocyclic compounds	0.954	Indoles and derivatives	0.583	Indoles	0.531			Indoles	0.531	Organic compounds; Organoheterocyclic compounds; Indoles and derivatives; Ethers; Organic acids and derivatives; Carboxylic acids and derivatives; Organonitrogen compounds; Organooxygen compounds; Carboxylic acid amides; Carboxylic acid derivatives; Monocarboxylic acids and derivatives; Carbonyl compounds; Benzene and substituted derivatives; Benzenoids; Indoles; Organic oxides; Azacyclic compoun…		379	742881437069987570	735853584428970637
1857	-1	0.95267	1.27594e-05	240.102	6.602	1	C15H13NO2	[M + H]+	C15H14NO2+	Alkaloids	0.938	Tryptophan alkaloids	0.234	Simple indole alkaloids	0.18	Benzenoids	0.999	Phenols	0.852	1-hydroxy-2-unsubstituted benzenoids	0.878			1-hydroxy-2-unsubstituted benzenoids	0.878	Organic compounds; Organoheterocyclic compounds; Phenols; Organonitrogen compounds; Organooxygen compounds; Benzene and substituted derivatives; Benzenoids; Azacyclic compounds; Heteroaromatic compounds; Hydrocarbon derivatives; Organopnictogen compounds; Organic oxygen compounds; 1-hydroxy-2-unsubstituted benzenoids; Organic nitrogen compounds; Chemical entities		396	742773181942129586	735853422201673519
1892	439	0.928412	0.000323493	219.113	6.656	1	C12H14N2O2	[M + H]+	C12H15N2O2+	Alkaloids	0.958	Tryptophan alkaloids	0.885	Simple indole alkaloids	0.945	Organoheterocyclic compounds	0.994	Indoles and derivatives	0.993	Tryptamines and derivatives	0.604	Serotonins	0.484	N-acylserotonins	0.617	Organic compounds; Organoheterocyclic compounds; Pyrroles; Phenols; Tryptamines and derivatives; Indoles and derivatives; Organic acids and derivatives; Carboxylic acids and derivatives; Organonitrogen compounds; Organooxygen compounds; Carboxylic acid amides; Carboxylic acid derivatives; Secondary carboxylic acid amides; Carbonyl compounds; Substituted pyrroles; Benzenoids; Indoles; Acetamides; …		399	742865385707643242	735853399409824803
1898	55	0.933971	0.000172489	325.154	6.655	1	C16H24N2O3S	[M + H]+	C16H25N2O3S+	Amino acids and Peptides	0.943	Small peptides	0.682	Dipeptides	0.688	Organic acids and derivatives	0.953	Carboxylic acids and derivatives	0.919	Amino acids, peptides, and analogues	0.787	Amino acids and derivatives	0.778	Alpha amino acids and derivatives	0.622	Organic compounds; Organosulfur compounds; Amino acids, peptides, and analogues; Alpha amino acids and derivatives; Phenols; Organic acids and derivatives; Carboxylic acids and derivatives; Organonitrogen compounds; Organooxygen compounds; Amino acids and derivatives; Carboxylic acid amides; Carboxylic acid derivatives; Secondary carboxylic acid amides; Carbonyl compounds; Benzene and substituted…		399	742834341982853572	735853493840388614
1961	144	0.934758	0.000157102	261.102	6.713	1	C17H12N2O	[M + H]+	C17H13N2O+	Alkaloids	0.918	Tryptophan alkaloids	0.56	Carbazole alkaloids	0.144	Benzenoids	0.997							Benzenoids	0.997	Organic compounds; Organoheterocyclic compounds; Organic acids and derivatives; Organonitrogen compounds; Organooxygen compounds; Benzenoids; Organic oxides; Azacyclic compounds; Heteroaromatic compounds; Hydrocarbon derivatives; Organopnictogen compounds; Organic oxygen compounds; Organic nitrogen compounds; Chemical entities		403	742832849934701561	735853441994594665
1963	-1	0.936559	0.00012632	307.107	6.712	1	C18H14N2O3	[M + H]+	C18H15N2O3+	Alkaloids	0.944	Tryptophan alkaloids	0.426	Quinazoline alkaloids	0.039	Organic acids and derivatives	1	Carboxylic acids and derivatives	0.999	Amino acids, peptides, and analogues	0.815	Amino acids and derivatives	0.813	Alpha amino acids and derivatives	0.85	Organic compounds; Organoheterocyclic compounds; Amino acids, peptides, and analogues; Alpha amino acids and derivatives; Indoles and derivatives; Organic acids and derivatives; Carboxylic acids and derivatives; Organonitrogen compounds; Organooxygen compounds; Amino acids and derivatives; Carboxylic acid derivatives; Monocarboxylic acids and derivatives; Carboxylic acids; Indolyl carboxylic acid…		403	742830661502058699	735853480586387369
2026	-1	0.907047	0.00244008	361.13	6.771	1	C20H16N4O3	[M + H]+	C20H17N4O3+	Alkaloids	0.561	Tryptophan alkaloids	0.1	Benzodiazepine alkaloids	0.053	Benzenoids	0.996	Benzene and substituted derivatives	0.935					Benzene and substituted derivatives	0.935	Organic compounds; Organoheterocyclic compounds; Organic acids and derivatives; Carboxylic acids and derivatives; Organonitrogen compounds; Organooxygen compounds; Azoles; Benzene and substituted derivatives; Benzenoids; Organic oxides; Azacyclic compounds; Heteroaromatic compounds; Hydrocarbon derivatives; Organopnictogen compounds; Organic oxygen compounds; Organic nitrogen compounds; Chemical …		406	742883010793822451	735853520268699349
2064	-1	0.966887	7.66143e-07	444.171	6.801	1	C29H21N3O2	[M + H]+	C29H22N3O2+	Alkaloids	0.91	Tryptophan alkaloids	0.942	Carboline alkaloids	0.116	Organic acids and derivatives	0.994	Carboxylic acids and derivatives	0.991	Amino acids, peptides, and analogues	0.749	Amino acids and derivatives	0.749	Amino acids and derivatives	0.749	Organic compounds; Organoheterocyclic compounds; Amino acids, peptides, and analogues; Pyrroles; Indoles and derivatives; Organic acids and derivatives; Carboxylic acids and derivatives; Organonitrogen compounds; Organooxygen compounds; Amino acids and derivatives; Monocarboxylic acids and derivatives; Carboxylic acids; Carbonyl compounds; Substituted pyrroles; Benzene and substituted derivatives…		408	742795459530654022	735853573251149927
2065	-1	0.922193	0.000617511	490.161	6.799	1	C26H23N3O7	[M + H]+	C26H24N3O7+	Alkaloids	0.695	Anthranilic acid alkaloids	0.28	Simple coumarins	0.077	Organoheterocyclic compounds	0.961	Quinolines and derivatives	0.522	Quinolones and derivatives	0.495	Hydroquinolones	0.518	Hydroquinolones	0.518	Organic compounds; Organoheterocyclic compounds; Alkyl aryl ethers; Anisoles; Ethers; Organic acids and derivatives; Carboxylic acids and derivatives; Organonitrogen compounds; Anilides; Benzoyl derivatives; Organooxygen compounds; Carboxylic acid amides; Carboxylic acid derivatives; Pyridinones; Quinolines and derivatives; Secondary carboxylic acid amides; Hydroquinolones; Carbonyl compounds; Be…		408	742871344601478041	735853595145417862
2082	-1	0.900664	0.00406606	298.107	6.823	1	C17H15NO4	[M + H]+	C17H16NO4+	Alkaloids	0.823	Tyrosine alkaloids	0.096	Simple oxindole alkaloids	0.073	Benzenoids	0.997	Phenol ethers	0.653					Phenol ethers	0.653	Organic compounds; Organoheterocyclic compounds; Alkyl aryl ethers; Lactams; Ethers; Organic acids and derivatives; Carboxylic acids and derivatives; Organonitrogen compounds; Organooxygen compounds; Carboxylic acid amides; Carboxylic acid derivatives; Monocarboxylic acids and derivatives; Carboxylic acids; Carbonyl compounds; Benzene and substituted derivatives; Phenol ethers; Benzenoids; Organi…		409	742887579246526944	735853470784298486
2108	28	0.916816	0.00103588	251.107	6.85	1	C17H14O2	[M + H]+	C17H15O2+	Shikimates and Phenylpropanoids	0.986	Flavonoids	0.532	Chalcones	0.332	Benzenoids	0.999	Benzene and substituted derivatives	0.959					Benzene and substituted derivatives	0.959	Organic compounds; Phenylpropanoids and polyketides; Organooxygen compounds; Carbonyl compounds; Benzene and substituted derivatives; Benzenoids; Organic oxides; Hydrocarbon derivatives; Organic oxygen compounds; Chemical entities		411	742875129352667114	735853431332673657
2174	-1	0.947584	2.84088e-05	307.108	6.909	1	C18H14N2O3	[M + H]+	C18H15N2O3+	Alkaloids	0.965	Tryptophan alkaloids	0.622	Quinoline alkaloids	0.103	Organoheterocyclic compounds	0.972	Indoles and derivatives	0.668					Indoles and derivatives	0.668	Organic compounds; Organoheterocyclic compounds; Indoles and derivatives; Organic acids and derivatives; Carboxylic acids and derivatives; Organonitrogen compounds; Organooxygen compounds; Carboxylic acid derivatives; Monocarboxylic acids and derivatives; Carboxylic acids; Carbonyl compounds; Benzene and substituted derivatives; Benzenoids; Organic oxides; Azacyclic compounds; Heteroaromatic comp…		415	742823524843465313	735853480678662062
2184	28	0.966919	7.60221e-07	388.154	6.918	1	C24H21NO4	[M + H]+	C24H22NO4+	Shikimates and Phenylpropanoids	0.709	Nicotinic acid alkaloids	0.11	Pyridine alkaloids	0.111	Benzenoids	1	Phenols	0.908	1-hydroxy-2-unsubstituted benzenoids	0.908			1-hydroxy-2-unsubstituted benzenoids	0.908	Organic compounds; Organoheterocyclic compounds; Phenols; Phenylpropanoids and polyketides; Organic acids and derivatives; Carboxylic acids and derivatives; Organonitrogen compounds; Organooxygen compounds; Monocarboxylic acids and derivatives; Carboxylic acids; Carbonyl compounds; Benzene and substituted derivatives; Benzenoids; Organic oxides; Azacyclic compounds; Hydrocarbon derivatives; Organ…		415	739139369489744003	735853537805085153
2186	144	0.930606	0.000253964	261.102	6.918	1	C17H12N2O	[M + H]+	C17H13N2O+	Alkaloids	0.839	Tryptophan alkaloids	0.536	Carboline alkaloids	0.077	Organoheterocyclic compounds	0.978	Indoles and derivatives	0.514					Indoles and derivatives	0.514	Organic compounds; Organoheterocyclic compounds; Lactams; Indoles and derivatives; Organic acids and derivatives; Carboxylic acids and derivatives; Organonitrogen compounds; Organooxygen compounds; Carboxylic acid amides; Carboxylic acid derivatives; Benzene and substituted derivatives; Benzenoids; Organic oxides; Azacyclic compounds; Heteroaromatic compounds; Hydrocarbon derivatives; Organopnict…		415	742859353811949214	735853441881348452
2201	28	0.95084	1.71846e-05	282.112	6.956	1	C14H16FNO4	[M + H]+	C14H17FNO4+	Alkaloids	0.39	Ornithine alkaloids	0.214	Pyrrolidine alkaloids	0.192	Benzenoids	0.99	Benzene and substituted derivatives	0.981	Halobenzenes	0.862	Fluorobenzenes	0.833	Fluorobenzenes	0.833	Organic compounds; Halobenzenes; Organic acids and derivatives; Carboxylic acids and derivatives; Organohalogen compounds; Organonitrogen compounds; Organooxygen compounds; Carboxylic acid amides; Aryl fluorides; Carboxylic acid derivatives; Fluorobenzenes; Monocarboxylic acids and derivatives; Carboxylic acids; Organofluorides; Secondary carboxylic acid amides; Carbonyl compounds; Benzene and su…		417	739265622166973818	735853458620816376
2213	28	0.906791	0.0024922	397.154	6.936	1	C25H20N2O3	[M + H]+	C25H21N2O3+	Alkaloids	0.703	Tryptophan alkaloids	0.309	Chalcones	0.028	Benzenoids	1	Phenols	0.92	1-hydroxy-2-unsubstituted benzenoids	0.913			1-hydroxy-2-unsubstituted benzenoids	0.913	Organic compounds; Organoheterocyclic compounds; Phenols; Lactams; Organic acids and derivatives; Organonitrogen compounds; Organooxygen compounds; Benzene and substituted derivatives; Benzenoids; Organic oxides; Azacyclic compounds; Heteroaromatic compounds; Hydrocarbon derivatives; Organopnictogen compounds; Organic oxygen compounds; 1-hydroxy-2-unsubstituted benzenoids; Organic nitrogen compou…		416	742883424083761898	735853543886826243
2237	38	0.934088	0.000170127	490.161	6.955	1	C26H23N3O7	[M + H]+	C26H24N3O7+	Alkaloids	0.428	Anthranilic acid alkaloids	0.07	Simple coumarins	0.171	Benzenoids	0.998	Phenol ethers	0.63	Anisoles	0.602			Anisoles	0.602	Organic compounds; Organoheterocyclic compounds; Alkyl aryl ethers; Anisoles; Ethers; Organic acids and derivatives; Carboxylic acids and derivatives; Organonitrogen compounds; Benzoyl derivatives; Organooxygen compounds; Carboxylic acid amides; Carboxylic acid derivatives; Secondary carboxylic acid amides; Carbonyl compounds; Benzene and substituted derivatives; Phenol ethers; Benzenoids; Organi…		417	742833546348549533	735853595061531777
2249	398	0.926275	0.000406537	428.149	6.964	1	C18H25N3O7S	[M + H]+	C18H26N3O7S+	Amino acids and Peptides	0.941	Beta-lactams	0.429	Tripeptides	0.206	Organic acids and derivatives	0.998	Carboxylic acids and derivatives	0.995	Amino acids, peptides, and analogues	0.965	Peptides	0.821	Peptides	0.821	Organic compounds; Organosulfur compounds; Lipids and lipid-like molecules; Amino acids, peptides, and analogues; Alpha amino acids and derivatives; Organic acids and derivatives; Carboxylic acids and derivatives; Organonitrogen compounds; Organooxygen compounds; Fatty amides; Amino acids and derivatives; Peptides; Monoalkylamines; Carboxylic acid amides; Carboxylic acid derivatives; N-acyl amine…		418	742868645168392736	735853565269389035
2268	28	0.966189	9.03315e-07	456.192	7.019	1	C27H25N3O4	[M + H]+	C27H26N3O4+	Amino acids and Peptides	0.845	Peptide alkaloids	0.152	Other indole diketopiperazine alkaloids	0.164	Organic acids and derivatives	0.987	Carboxylic acids and derivatives	0.964	Amino acids, peptides, and analogues	0.574	Amino acids and derivatives	0.57	Alpha amino acids and derivatives	0.542	Organic compounds; Organoheterocyclic compounds; Amino acids, peptides, and analogues; Alpha amino acids and derivatives; Pyrroles; Phenols; Indoles and derivatives; Organic acids and derivatives; Carboxylic acids and derivatives; Organonitrogen compounds; Organooxygen compounds; Amino acids and derivatives; Carboxylic acid amides; Carboxylic acid derivatives; Secondary carboxylic acid amides; Ca…		421	739179763334202369	735853579735544246
2288	616	0.973436	1.34142e-07	203.118	6.989	1	C12H14N2O	[M + H]+	C12H15N2O+	Alkaloids	0.962	Tryptophan alkaloids	0.962	Simple indole alkaloids	0.991	Organic acids and derivatives	0.986	Carboxylic acids and derivatives	0.92	Carboxylic acid derivatives	0.94	Carboxylic acid amides	0.933	N-acetyl-2-arylethylamines	0.828	Organic compounds; Organoheterocyclic compounds; Pyrroles; Indoles and derivatives; Organic acids and derivatives; Carboxylic acids and derivatives; Organonitrogen compounds; Organooxygen compounds; Carboxylic acid amides; Carboxylic acid derivatives; Secondary carboxylic acid amides; Carbonyl compounds; Substituted pyrroles; Benzenoids; Indoles; Acetamides; Organic oxides; Azacyclic compounds; H…		419	738900146308329683	735853386722054818
2293	28	0.956974	6.03253e-06	309.159	6.992	1	C19H20N2O2	[M + H]+	C19H21N2O2+	Alkaloids	0.952	Tryptophan alkaloids	0.922	Simple indole alkaloids	0.203	Organoheterocyclic compounds	0.991	Indoles and derivatives	0.978	Tryptamines and derivatives	0.546			Tryptamines and derivatives	0.546	Organic compounds; Organoheterocyclic compounds; Pyrroles; Phenols; Tryptamines and derivatives; Indoles and derivatives; Organic acids and derivatives; Carboxylic acids and derivatives; Organonitrogen compounds; Organooxygen compounds; Carboxylic acid amides; Carboxylic acid derivatives; Secondary carboxylic acid amides; Carbonyl compounds; Substituted pyrroles; Benzene and substituted derivativ…		420	739203107739378241	735853482314440702
2514	28	0.921401	0.000667947	282.112	7.066	1	C17H15NO3	[M + H]+	C17H16NO3+	Alkaloids	0.69	Flavonoids	0.156	Chalcones	0.103	Organoheterocyclic compounds	0.94	Indoles and derivatives	0.51					Indoles and derivatives	0.51	Organic compounds; Organoheterocyclic compounds; Phenols; Indoles and derivatives; Organic acids and derivatives; Carboxylic acids and derivatives; Organonitrogen compounds; Organooxygen compounds; Carboxylic acid derivatives; Carbonyl compounds; Benzene and substituted derivatives; Benzenoids; Organic oxides; Azacyclic compounds; Heteroaromatic compounds; Hydrocarbon derivatives; Organopnictogen…		424	739270040006416911	735853458499181555
2532	28	0.972239	1.90176e-07	456.192	7.063	1	C27H25N3O4	[M + H]+	C27H26N3O4+	Amino acids and Peptides	0.816	Peptide alkaloids	0.416	Other indole diketopiperazine alkaloids	0.439	Organic acids and derivatives	0.992	Carboxylic acids and derivatives	0.979	Amino acids, peptides, and analogues	0.832	Amino acids and derivatives	0.828	Alpha amino acids and derivatives	0.827	Organic compounds; Organoheterocyclic compounds; Amino acids, peptides, and analogues; Alpha amino acids and derivatives; Pyrroles; Phenols; Phenethylamines; Amphetamines and derivatives; Indoles and derivatives; Organic acids and derivatives; Carboxylic acids and derivatives; Organonitrogen compounds; Organooxygen compounds; Amino acids and derivatives; Carboxylic acid amides; Carboxylic acid de…		424	738916240716805741	735853579651658161
2646	-1	0.935577	0.000142387	381.16	7.1	1	C25H20N2O2	[M + H]+	C25H21N2O2+	Alkaloids	0.879	Anthranilic acid alkaloids	0.659	Quinoline alkaloids	0.105	Benzenoids	1	Benzene and substituted derivatives	0.968					Benzene and substituted derivatives	0.968	Organic compounds; Organoheterocyclic compounds; Lactams; Organic acids and derivatives; Carboxylic acids and derivatives; Organonitrogen compounds; Organooxygen compounds; Carboxylic acid amides; Carboxylic acid derivatives; Carbonyl compounds; Benzene and substituted derivatives; Benzenoids; Organic oxides; Azacyclic compounds; Heteroaromatic compounds; Hydrocarbon derivatives; Organopnictogen …		426	742831632630238680	735853534680328523
2717	38	0.91963	0.000793712	472.15	7.155	1	C26H21N3O6	[M + H]+	C26H22N3O6+	Alkaloids	0.436	Coumarins	0.105	Simple coumarins	0.26	Benzenoids	0.999	Phenol ethers	0.773	Anisoles	0.719			Anisoles	0.719	Organic compounds; Organoheterocyclic compounds; Alkyl aryl ethers; Anisoles; Ethers; Organic acids and derivatives; Carboxylic acids and derivatives; Organonitrogen compounds; Organooxygen compounds; Carboxylic acid amides; Carboxylic acid derivatives; Secondary carboxylic acid amides; Carbonyl compounds; Benzene and substituted derivatives; Phenol ethers; Benzenoids; Organic oxides; Methoxybenz…		429	742872976127015227	735853586530317041
2719	150	0.962377	2.0977e-06	284.092	7.156	1	C16H13NO4	[M + H]+	C16H14NO4+	Alkaloids	0.807	Anthranilic acid alkaloids	0.365	Simple oxindole alkaloids	0.106	Benzenoids	0.997	Benzene and substituted derivatives	0.745	Phenoxy compounds	0.502			Phenoxy compounds	0.502	Organic compounds; Organoheterocyclic compounds; Ethers; Organic acids and derivatives; Carboxylic acids and derivatives; Organonitrogen compounds; Organooxygen compounds; Carboxylic acid amides; Carboxylic acid derivatives; Monocarboxylic acids and derivatives; Carboxylic acids; Carbonyl compounds; Benzene and substituted derivatives; Benzenoids; Organic oxides; Azacyclic compounds; Hydrocarbon …		429	741008269054412992	735853460562779208
2721	-1	0.906395	0.00257489	246.091	7.161	1	C17H11NO	[M + H]+	C17H12NO+	Alkaloids	0.981	Tryptophan alkaloids	0.641	Carbazole alkaloids	0.482	Benzenoids	0.998							Benzenoids	0.998	Organic compounds; Organoheterocyclic compounds; Pyridines and derivatives; Organonitrogen compounds; Organooxygen compounds; Benzenoids; Organic oxides; Azacyclic compounds; Heteroaromatic compounds; Hydrocarbon derivatives; Organopnictogen compounds; Organic oxygen compounds; Organic nitrogen compounds; Chemical entities		430	742883811595509017	735853425666168758
2724	28	0.974484	9.75367e-08	387.17	7.156	1	C24H22N2O3	[M + H]+	C24H23N2O3+	Alkaloids	0.641	Tryptophan alkaloids	0.428	Simple indole alkaloids	0.019	Organoheterocyclic compounds	0.933	Indoles and derivatives	0.679	Indoles	0.667	3-alkylindoles	0.527	3-alkylindoles	0.527	Organic compounds; Organoheterocyclic compounds; Pyrroles; Phenols; Indoles and derivatives; Organic acids and derivatives; Carboxylic acids and derivatives; Organonitrogen compounds; Organooxygen compounds; Carbonyl compounds; Substituted pyrroles; Benzene and substituted derivatives; Benzenoids; Indoles; Organic oxides; Azacyclic compounds; Heteroaromatic compounds; Hydrocarbon derivatives; 3-a…		429	738898401565944813	735853537205299651
2739	55	0.926769	0.000385869	422.207	7.166	1	C21H28FN3O5	[M + H]+	C21H29FN3O5+	Amino acids and Peptides	0.841	Small peptides	0.494	Dipeptides	0.094	Organic acids and derivatives	0.977	Carboxylic acids and derivatives	0.965	Amino acids, peptides, and analogues	0.784	Amino acids and derivatives	0.776	Amino acids and derivatives	0.776	Organic compounds; Amino acids, peptides, and analogues; Halobenzenes; Organic acids and derivatives; Carboxylic acids and derivatives; Organohalogen compounds; Organonitrogen compounds; Organooxygen compounds; Amino acids and derivatives; Carboxylic acid amides; Alkyl fluorides; Carboxylic acid derivatives; Fluorobenzenes; Carboxylic acids; Organofluorides; Secondary carboxylic acid amides; Carb…		430	742866723367659475	735853562652143219
2860	-1	0.911009	0.00174425	346.155	7.22	1	C21H19N3O2	[M + H]+	C21H20N3O2+	Alkaloids	0.887	Tryptophan alkaloids	0.687	Simple indole alkaloids	0.542	Organoheterocyclic compounds	1	Indoles and derivatives	0.985	Indoles	0.969			Indoles	0.969	Organic compounds; Organoheterocyclic compounds; Pyrroles; Indoles and derivatives; Organic acids and derivatives; Carboxylic acids and derivatives; Organonitrogen compounds; Organooxygen compounds; Carboxylic acid amides; Carboxylic acid derivatives; Tertiary carboxylic acid amides; Carbonyl compounds; Substituted pyrroles; Benzenoids; Indoles; Vinylogous amides; Organic oxides; Azacyclic compou…		433	742881726523101422	735853508616922312
2990	-1	0.987026	4.53248e-10	500.195	7.262	1	C30H27N3O3	[M + Na]+	C30H27N3NaO3+	Alkaloids	0.758	Tryptophan alkaloids	0.903	Carboline alkaloids	0.146	Organic acids and derivatives	0.972	Carboxylic acids and derivatives	0.962	Amino acids, peptides, and analogues	0.835	Amino acids and derivatives	0.833	Alpha amino acids and derivatives	0.542	Organic compounds; Organoheterocyclic compounds; Amino acids, peptides, and analogues; Alpha amino acids and derivatives; Pyrroles; Lactams; Indoles and derivatives; Organic acids and derivatives; Carboxylic acids and derivatives; Organonitrogen compounds; Organooxygen compounds; Amino acids and derivatives; Carboxylic acid amides; Carboxylic acid derivatives; Secondary carboxylic acid amides; Te…		436	742797273583912053	735853598278563125
3000	-1	0.945058	4.10668e-05	238.086	7.259	1	C15H11NO2	[M + H]+	C15H12NO2+	Alkaloids	0.948	Anthranilic acid alkaloids	0.86	Quinoline alkaloids	0.312	Benzenoids	0.991	Benzene and substituted derivatives	0.504					Benzene and substituted derivatives	0.504	Organic compounds; Organoheterocyclic compounds; Organic acids and derivatives; Organonitrogen compounds; Organooxygen compounds; Benzene and substituted derivatives; Benzenoids; Organic oxides; Azacyclic compounds; Heteroaromatic compounds; Hydrocarbon derivatives; Organopnictogen compounds; Organic oxygen compounds; Organic nitrogen compounds; Chemical entities		436	742824664804962190	735853420230350559
3214	-1	0.980671	1.07847e-08	331.141	7.286	1	C13H22N4O4S	[M + H]+	C13H23N4O4S+	Amino acids and Peptides	0.383	Histidine alkaloids	0.088	Cyclamides	0.131	Organoheterocyclic compounds	0.876	Azoles	0.79					Azoles	0.79	Organic compounds; Organoheterocyclic compounds; Organosulfur compounds; Organic acids and derivatives; Carboxylic acids and derivatives; Organosulfonic acids and derivatives; Organonitrogen compounds; Organooxygen compounds; Azoles; Carboxylic acid derivatives; Monocarboxylic acids and derivatives; Sulfonyls; Carboxylic acid esters; Carbonyl compounds; Organic oxides; Azacyclic compounds; Hetero…		437	742775357083021128	735853497304883898
3226	-1	0.986636	5.73795e-10	203.118	7.284	1	C12H14N2O	[M + H]+	C12H15N2O+	Alkaloids	0.971	Tryptophan alkaloids	0.971	Simple indole alkaloids	0.991	Organic acids and derivatives	0.994	Carboxylic acids and derivatives	0.96	Carboxylic acid derivatives	0.97	Carboxylic acid amides	0.962	N-acetyl-2-arylethylamines	0.882	Organic compounds; Organoheterocyclic compounds; Pyrroles; Indoles and derivatives; Organic acids and derivatives; Carboxylic acids and derivatives; Organonitrogen compounds; Organooxygen compounds; Carboxylic acid amides; Carboxylic acid derivatives; Secondary carboxylic acid amides; Carbonyl compounds; Substituted pyrroles; Benzenoids; Indoles; Acetamides; Organic oxides; Azacyclic compounds; H…		437	742767594298728446	735853386420064925
3229	28	0.981781	6.74257e-09	309.159	7.219	1	C19H20N2O2	[M + H]+	C19H21N2O2+	Alkaloids	0.984	Tryptophan alkaloids	0.935	Carboline alkaloids	0.364	Organoheterocyclic compounds	0.977	Indoles and derivatives	0.953	Indoles	0.936	3-alkylindoles	0.9	3-alkylindoles	0.9	Organic compounds; Organoheterocyclic compounds; Pyrroles; Phenols; Phenylmethylamines; Indoles and derivatives; Organonitrogen compounds; Organooxygen compounds; Substituted pyrroles; Benzene and substituted derivatives; Benzenoids; Amines; Secondary amines; Indoles; Benzylamines; Aralkylamines; Azacyclic compounds; Heteroaromatic compounds; Hydrocarbon derivatives; 3-alkylindoles; Organopnictog…		433	739135037830676017	735853482431881219
3408	28	0.979219	1.91638e-08	282.112	7.297	1	C17H15NO3	[M + H]+	C17H16NO3+	Alkaloids	0.81	Tryptophan alkaloids	0.276	Simple oxindole alkaloids	0.285	Organoheterocyclic compounds	0.958	Indoles and derivatives	0.672	Indoles	0.548			Indoles	0.548	Organic compounds; Organoheterocyclic compounds; Phenols; Indoles and derivatives; Organic acids and derivatives; Carboxylic acids and derivatives; Organonitrogen compounds; Organooxygen compounds; Carboxylic acid derivatives; Monocarboxylic acids and derivatives; Carboxylic acids; Carbonyl compounds; Benzene and substituted derivatives; Benzenoids; Indoles; Organic oxides; Azacyclic compounds; H…		438	738891916018512971	735853458276883433
3459	-1	0.963062	1.81474e-06	317.092	7.333	1	C16H13FN2O4	[M + H]+	C16H14FN2O4+	Shikimates and Phenylpropanoids	0.477	Anthranilic acid alkaloids	0.313	Simple coumarins	0.309	Benzenoids	0.999	Benzene and substituted derivatives	0.964	Anilides	0.626			Anilides	0.626	Organic compounds; Organoheterocyclic compounds; Halobenzenes; Organic acids and derivatives; Carboxylic acids and derivatives; Organohalogen compounds; Organonitrogen compounds; Anilides; Organooxygen compounds; Carboxylic acid amides; Aryl fluorides; Carboxylic acid derivatives; Fluorobenzenes; Organofluorides; Secondary carboxylic acid amides; Carbonyl compounds; Benzene and substituted deriva…		440	742774486043518470	735853489721581876
3492	55	0.925042	0.000462412	451.165	7.35	1	C28H22N2O4	[M + H]+	C28H23N2O4+	Alkaloids	0.657	Tryptophan alkaloids	0.282	Simple indole alkaloids	0.223	Organoheterocyclic compounds	0.968	Indoles and derivatives	0.857	Indoles	0.876	3-alkylindoles	0.836	3-alkylindoles	0.836	Organic compounds; Organoheterocyclic compounds; Pyrroles; Phenols; Indoles and derivatives; Organic acids and derivatives; Carboxylic acids and derivatives; Organonitrogen compounds; Organooxygen compounds; Carboxylic acid derivatives; Monocarboxylic acids and derivatives; Carboxylic acids; Carbonyl compounds; Substituted pyrroles; Benzene and substituted derivatives; Benzenoids; Indoles; Organi…		441	742870417639321011	735853576363323660
3560	55	0.9993	3.36479e-20	437.184	7.401	1	C26H26N2O3	[M + Na]+	C26H26N2NaO3+	Alkaloids	0.593	Tryptophan alkaloids	0.455	Carbazole alkaloids	0.066	Organoheterocyclic compounds	0.847	Indoles and derivatives	0.539					Indoles and derivatives	0.539	Organic compounds; Organoheterocyclic compounds; Pyrroles; Phenols; Indoles and derivatives; Organic acids and derivatives; Carboxylic acids and derivatives; Organonitrogen compounds; Organooxygen compounds; Substituted pyrroles; Benzene and substituted derivatives; Benzenoids; Organic oxides; Azacyclic compounds; Heteroaromatic compounds; Hydrocarbon derivatives; Organopnictogen compounds; Organ…		444	735855361937268964	735853568922628009
3583	28	0.961785	2.37253e-06	496.223	7.423	1	C30H29N3O4	[M + H]+	C30H30N3O4+	Amino acids and Peptides	0.576	Tryptophan alkaloids	0.262	Other indole diketopiperazine alkaloids	0.137	Organic acids and derivatives	0.966	Carboxylic acids and derivatives	0.956	Amino acids, peptides, and analogues	0.853	Amino acids and derivatives	0.85	Alpha amino acids and derivatives	0.833	Organic compounds; Organoheterocyclic compounds; Amino acids, peptides, and analogues; Alpha amino acids and derivatives; Pyrroles; Phenols; Indoles and derivatives; Organic acids and derivatives; Carboxylic acids and derivatives; Organonitrogen compounds; Organooxygen compounds; Amino acids and derivatives; Carboxylic acid derivatives; Carbonyl compounds; Substituted pyrroles; Benzene and substi…		445	739200903414521387	735853595929752755
3585	28	0.964835	1.23127e-06	390.181	7.421	1	C23H23N3O3	[M + H]+	C23H24N3O3+	Amino acids and Peptides	0.908	Peptide alkaloids	0.333	Other indole diketopiperazine alkaloids	0.222	Organic acids and derivatives	0.991	Carboxylic acids and derivatives	0.985	Amino acids, peptides, and analogues	0.976	Amino acids and derivatives	0.974	Alpha amino acids and derivatives	0.962	Organic compounds; Organoheterocyclic compounds; Amino acids, peptides, and analogues; Alpha amino acids and derivatives; Pyrroles; Phenols; Tryptamines and derivatives; Indoles and derivatives; Organic acids and derivatives; Carboxylic acids and derivatives; Organonitrogen compounds; Organooxygen compounds; Amino acids and derivatives; Carboxylic acid amides; Carboxylic acid derivatives; Seconda…		445	739190166080538147	735853539109513757
3595	-1	0.967904	5.98741e-07	415.201	7.428	1	C26H26N2O3	[M + H]+	C26H27N2O3+	Alkaloids	0.65	Tryptophan alkaloids	0.458	Chalcones	0.067	Benzenoids	1	Phenols	0.991	1-hydroxy-2-unsubstituted benzenoids	0.988			1-hydroxy-2-unsubstituted benzenoids	0.988	Organic compounds; Organoheterocyclic compounds; Phenols; Organonitrogen compounds; Organooxygen compounds; Benzene and substituted derivatives; Benzenoids; Amines; Aralkylamines; Organic oxides; Azacyclic compounds; Heteroaromatic compounds; Hydrocarbon derivatives; Organopnictogen compounds; Organic oxygen compounds; 1-hydroxy-2-unsubstituted benzenoids; 1-hydroxy-4-unsubstituted benzenoids; Or…		446	742794400246595246	735853556520070461
3601	238	0.960215	3.2578e-06	518.205	7.431	1	C30H29N3O4	[M + Na]+	C30H29N3NaO4+	Alkaloids	0.731	Tryptophan alkaloids	0.434	Carboline alkaloids	0.071	Organic acids and derivatives	0.891	Carboxylic acids and derivatives	0.872	Amino acids, peptides, and analogues	0.567	Amino acids and derivatives	0.567	Amino acids and derivatives	0.567	Organic compounds; Organoheterocyclic compounds; Amino acids, peptides, and analogues; Alkyl aryl ethers; Ethers; Organic acids and derivatives; Carboxylic acids and derivatives; Organonitrogen compounds; Organooxygen compounds; Amino acids and derivatives; Carboxylic acid amides; Carboxylic acid derivatives; Carbonyl compounds; Benzene and substituted derivatives; Phenol ethers; Benzenoids; Amin…		446	741013042377886283	735853603341088308
3607	-1	0.953945	1.02973e-05	320.092	7.427	1	C19H13NO4	[M + H]+	C19H14NO4+	Alkaloids	0.92	Tryptophan alkaloids	0.451	Simple oxindole alkaloids	0.119	Organoheterocyclic compounds	0.969	Indoles and derivatives	0.623					Indoles and derivatives	0.623	Organic compounds; Organoheterocyclic compounds; Ketones; Indoles and derivatives; Organic acids and derivatives; Carboxylic acids and derivatives; Organonitrogen compounds; Organooxygen compounds; Carboxylic acid derivatives; Monocarboxylic acids and derivatives; Carboxylic acids; Carbonyl compounds; Benzene and substituted derivatives; Benzenoids; Aryl ketones; Aryl alkyl ketones; Organic oxide…		446	742774906165980616	735853491814539677
3633	398	0.900723	0.00404763	412.154	7.442	1	C26H21NO4	[M + H]+	C26H22NO4+	Shikimates and Phenylpropanoids	0.829	Flavonoids	0.295	Simple coumarins	0.175	Benzenoids	0.998	Benzene and substituted derivatives	0.979	Benzoyl derivatives	0.689			Benzoyl derivatives	0.689	Organic compounds; Ketones; Phenylpropanoids and polyketides; Organic acids and derivatives; Carboxylic acids and derivatives; Organonitrogen compounds; Benzoyl derivatives; Organooxygen compounds; Carboxylic acid amides; Carboxylic acid derivatives; Monocarboxylic acids and derivatives; Secondary carboxylic acid amides; Carbonyl compounds; Benzene and substituted derivatives; Benzenoids; Aryl ke…		447	742887085929263338	735853554506804441
3744	-1	0.921954	0.00063237	471.191	7.481	1	C25H27FN2O6	[M + H]+	C25H28FN2O6+	Alkaloids	0.276	Tryptophan alkaloids	0.084	Acridone alkaloids	0.027	Benzenoids	0.994	Benzene and substituted derivatives	0.927	Phenoxyacetic acid derivatives	0.76			Phenoxyacetic acid derivatives	0.76	Organic compounds; Organoheterocyclic compounds; Halobenzenes; Alkyl aryl ethers; Ethers; Organic acids and derivatives; Carboxylic acids and derivatives; Organohalogen compounds; Organonitrogen compounds; Organooxygen compounds; Phenoxyacetic acid derivatives; Carboxylic acid amides; Aryl fluorides; Carboxylic acid derivatives; Fluorobenzenes; Monocarboxylic acids and derivatives; Carboxylic aci…		449	742871849780229819	735853586249298658
3812	28	0.974116	1.0926e-07	498.238	7.497	1	C30H31N3O4	[M + H]+	C30H32N3O4+	Amino acids and Peptides	0.583	Tryptophan alkaloids	0.343	Other indole diketopiperazine alkaloids	0.093	Organic acids and derivatives	0.88	Carboxylic acids and derivatives	0.829	Amino acids, peptides, and analogues	0.544	Amino acids and derivatives	0.541	Amino acids and derivatives	0.541	Organic compounds; Organoheterocyclic compounds; Amino acids, peptides, and analogues; Pyrroles; Phenols; Indoles and derivatives; Organic acids and derivatives; Carboxylic acids and derivatives; Organonitrogen compounds; Organooxygen compounds; Amino acids and derivatives; Carbonyl compounds; Benzene and substituted derivatives; Benzenoids; Amines; Indoles; Aralkylamines; Organic oxides; Azacycl…		450	738899100487987109	735853597284513022
3928	28	0.901174	0.00390849	512.254	7.694	1	C31H33N3O4	[M + H]+	C31H34N3O4+	Amino acids and Peptides	0.483	Peptide alkaloids	0.104	Other indole diketopiperazine alkaloids	0.068	Benzenoids	0.999	Phenols	0.889	1-hydroxy-2-unsubstituted benzenoids	0.858			1-hydroxy-2-unsubstituted benzenoids	0.858	Organic compounds; Organoheterocyclic compounds; Phenols; Organic acids and derivatives; Organonitrogen compounds; Organooxygen compounds; Carbonyl compounds; Benzene and substituted derivatives; Benzenoids; Amines; Aralkylamines; Organic oxides; Azacyclic compounds; Hydrocarbon derivatives; Organopnictogen compounds; Organic oxygen compounds; 1-hydroxy-2-unsubstituted benzenoids; Organic nitroge…		462	735858891406336893	735853601818555876
3937	28	0.912624	0.00151451	282.112	7.708	1	C17H15NO3	[M + H]+	C17H16NO3+	Alkaloids	0.735	Tryptophan alkaloids	0.375	Simple indole alkaloids	0.332	Organoheterocyclic compounds	0.967	Indoles and derivatives	0.726	Indoles	0.681			Indoles	0.681	Organic compounds; Organoheterocyclic compounds; Pyrroles; Phenols; Indoles and derivatives; Organic acids and derivatives; Carboxylic acids and derivatives; Organonitrogen compounds; Organooxygen compounds; Monocarboxylic acids and derivatives; Carboxylic acids; Carbonyl compounds; Substituted pyrroles; Benzene and substituted derivatives; Benzenoids; Indoles; Organic oxides; Azacyclic compounds…		462	742880856116940127	735853458364963822
3944	28	0.96414	1.43691e-06	388.154	7.714	1	C24H21NO4	[M + H]+	C24H22NO4+	Alkaloids	0.725	Flavonoids	0.054	Chalcones	0.057	Benzenoids	0.999	Phenols	0.8	1-hydroxy-2-unsubstituted benzenoids	0.806			1-hydroxy-2-unsubstituted benzenoids	0.806	Organic compounds; Organoheterocyclic compounds; Phenols; Phenylpropanoids and polyketides; Organic acids and derivatives; Carboxylic acids and derivatives; Organonitrogen compounds; Organooxygen compounds; Carboxylic acid derivatives; Monocarboxylic acids and derivatives; Carbonyl compounds; Benzene and substituted derivatives; Benzenoids; Organic oxides; Azacyclic compounds; Hydrocarbon derivat…		463	739194168520297208	735853537712810460
3948	-1	0.917285	0.000991585	264.159	7.747	1	C15H21NO3	[M + H]+	C15H22NO3+	Alkaloids	0.889	Lysine alkaloids	0.163	Piperidine alkaloids	0.366	Benzenoids	0.806	Phenol ethers	0.532					Phenol ethers	0.532	Organic compounds; Alkyl aryl ethers; Ethers; Organic acids and derivatives; Carboxylic acids and derivatives; Organonitrogen compounds; Organooxygen compounds; Carboxylic acid amides; Carboxylic acid derivatives; Carboxylic acid esters; Secondary carboxylic acid amides; Carbonyl compounds; Benzene and substituted derivatives; Phenol ethers; Benzenoids; Acetamides; Organic oxides; Hydrocarbon der…		465	740945882930578053	735853445748496885
3977	28	0.909106	0.00205332	263.164	7.781	1	C16H22O3	[M + H]+	C16H23O3+	Terpenoids	0.975	Sesquiterpenoids	0.954	Eremophilane sesquiterpenoids	0.129	Lipids and lipid-like molecules	0.712	Prenol lipids	0.689	Sesquiterpenoids	0.567			Sesquiterpenoids	0.567	Organic compounds; Lipids and lipid-like molecules; Ketones; Prenol lipids; Organic acids and derivatives; Carboxylic acids and derivatives; Organooxygen compounds; Monocarboxylic acids and derivatives; Sesquiterpenoids; Carbonyl compounds; Cyclic ketones; Organic oxides; Hydrocarbon derivatives; Organic oxygen compounds; Chemical entities		467	740945625421283472	735853445131934172
4018	-1	0.989042	1.18087e-10	369.16	7.803	1	C16H24N4O4S	[M + H]+	C16H25N4O4S+	Amino acids and Peptides	0.863	Oligopeptides	0.56	Cyclamides	0.767	Organoheterocyclic compounds	0.94	Heteroaromatic compounds	0.686					Heteroaromatic compounds	0.686	Organic compounds; Organoheterocyclic compounds; Organosulfur compounds; Organic acids and derivatives; Carboxylic acids and derivatives; Organonitrogen compounds; Organooxygen compounds; Carbonyl compounds; Amines; Organic oxides; Azacyclic compounds; Heteroaromatic compounds; Hydrocarbon derivatives; Organopnictogen compounds; Organic oxygen compounds; Organic nitrogen compounds; Chemical entit…		468	741698032986058747	735853524567861164
4019	-1	0.994411	5.50333e-13	391.142	7.812	1	C18H25FN2O4	[M + K]+	C18H25FKN2O4+	Amino acids and Peptides	0.402	Small peptides	0.445	Dipeptides	0.08	Organic acids and derivatives	0.95	Carboxylic acids and derivatives	0.913	Amino acids, peptides, and analogues	0.643	Amino acids and derivatives	0.643	Amino acids and derivatives	0.643	Organic compounds; Organoheterocyclic compounds; Amino acids, peptides, and analogues; Halobenzenes; Organic acids and derivatives; Carboxylic acids and derivatives; Organohalogen compounds; Organonitrogen compounds; Organooxygen compounds; Amino acids and derivatives; Carboxylic acid amides; Aryl fluorides; Carboxylic acid derivatives; Fluorobenzenes; Monocarboxylic acids and derivatives; Organo…		469	742777102832039363	735853539411503660
4020	-1	0.982212	5.57409e-09	236.107	7.799	1	C16H13NO	[M + H]+	C16H14NO+	Alkaloids	0.964	Tryptophan alkaloids	0.548	Carbazole alkaloids	0.368	Organoheterocyclic compounds	0.933	Indoles and derivatives	0.528					Indoles and derivatives	0.528	Organic compounds; Organoheterocyclic compounds; Indoles and derivatives; Organonitrogen compounds; Organooxygen compounds; Benzene and substituted derivatives; Benzenoids; Organic oxides; Azacyclic compounds; Heteroaromatic compounds; Hydrocarbon derivatives; Organopnictogen compounds; Organic oxygen compounds; Organic nitrogen compounds; Chemical entities		468	742772818132394576	735853419362129591
4038	28	0.963044	1.82188e-06	416.205	7.824	1	C19H25N7O4	[M + H]+	C19H26N7O4+	Amino acids and Peptides	0.929	Oligopeptides	0.7	Dipeptides	0.131	Organic acids and derivatives	0.967	Carboxylic acids and derivatives	0.904	Amino acids, peptides, and analogues	0.868	Amino acids and derivatives	0.857	Alpha amino acids and derivatives	0.776	Organic compounds; Organoheterocyclic compounds; Amino acids, peptides, and analogues; Alpha amino acids and derivatives; Phenols; Phenethylamines; Amphetamines and derivatives; Organic acids and derivatives; Carboxylic acids and derivatives; Organonitrogen compounds; Organooxygen compounds; Amino acids and derivatives; Carboxylic acid amides; Carboxylic acid derivatives; Carbonyl compounds; Benz…		469	739200065312890023	735853557119855963
4045	238	0.977051	4.21055e-08	437.183	7.822	1	C26H26N2O3	[M + Na]+	C26H26N2NaO3+	Amino acids and Peptides	0.44	Tryptophan alkaloids	0.067	Chalcones	0.021	Benzenoids	1	Phenol ethers	0.61					Phenol ethers	0.61	Organic compounds; Alkyl aryl ethers; Ethers; Organic acids and derivatives; Carboxylic acids and derivatives; Organonitrogen compounds; Organooxygen compounds; Carboxylic acid amides; Carboxylic acid derivatives; Carbonyl compounds; Benzene and substituted derivatives; Phenol ethers; Benzenoids; Organic oxides; Hydrocarbon derivatives; Organopnictogen compounds; Organic oxygen compounds; Organic…		469	738897544166320546	735853568838741924
4048	28	0.977167	4.04452e-08	309.159	7.823	1	C19H20N2O2	[M + H]+	C19H21N2O2+	Alkaloids	0.927	Tryptophan alkaloids	0.886	Simple indole alkaloids	0.225	Organoheterocyclic compounds	0.985	Indoles and derivatives	0.981	Tryptamines and derivatives	0.549			Tryptamines and derivatives	0.549	Organic compounds; Organoheterocyclic compounds; Pyrroles; Phenols; Tryptamines and derivatives; Indoles and derivatives; Organic acids and derivatives; Carboxylic acids and derivatives; Organonitrogen compounds; Organooxygen compounds; Carboxylic acid amides; Carboxylic acid derivatives; Secondary carboxylic acid amides; Carbonyl compounds; Substituted pyrroles; Benzene and substituted derivativ…		469	738895109909707356	735853482620624909
4049	28	0.973202	1.43782e-07	415.201	7.825	1	C26H26N2O3	[M + H]+	C26H27N2O3+	Alkaloids	0.598	Tryptophan alkaloids	0.177	Chalcones	0.186	Benzenoids	1	Benzene and substituted derivatives	0.996	Phenylmethylamines	0.676			Phenylmethylamines	0.676	Organic compounds; Organoheterocyclic compounds; Phenols; Phenylmethylamines; Organonitrogen compounds; Organooxygen compounds; Benzene and substituted derivatives; Benzenoids; Amines; Secondary amines; Benzylamines; Aralkylamines; Organic oxides; Azacyclic compounds; Heteroaromatic compounds; Hydrocarbon derivatives; Organopnictogen compounds; Organic oxygen compounds; 1-hydroxy-2-unsubstituted …		470	738910678746739234	735853556624928066
4071	28	0.964526	1.31925e-06	512.254	7.839	1	C31H33N3O4	[M + H]+	C31H34N3O4+	Alkaloids	0.393	Tryptophan alkaloids	0.301	Other indole diketopiperazine alkaloids	0.038	Organoheterocyclic compounds	0.919	Indoles and derivatives	0.608	Indoles	0.543			Indoles	0.543	Organic compounds; Organoheterocyclic compounds; Phenols; Indoles and derivatives; Organic acids and derivatives; Organonitrogen compounds; Organooxygen compounds; Carbonyl compounds; Benzene and substituted derivatives; Benzenoids; Amines; Indoles; Organic oxides; Azacyclic compounds; Heteroaromatic compounds; Hydrocarbon derivatives; Organopnictogen compounds; Organic oxygen compounds; 1-hydrox…		470	739192901878237466	735853601906636265
4077	48	0.903756	0.00318891	303.084	7.848	1	C14H16O6	[M + Na]+	C14H16NaO6+	Terpenoids	0.452	Sesquiterpenoids	0.348	Phthalide derivatives	0.431	Organic acids and derivatives	0.777	Carboxylic acids and derivatives	0.743	Carboxylic acid derivatives	0.569	Carboxylic acid esters	0.552	Carboxylic acid esters	0.552	Organic compounds; Organoheterocyclic compounds; Lactones; Ethers; Organic acids and derivatives; Carboxylic acids and derivatives; Organooxygen compounds; Carboxylic acid derivatives; Carboxylic acid esters; Carbonyl compounds; Organic oxides; Oxacyclic compounds; Hydrocarbon derivatives; Organic oxygen compounds; Chemical entities		471	742885553775175778	735853475515473613
4083	83	0.967881	6.02249e-07	268.097	7.85	1	C16H13NO3	[M + H]+	C16H14NO3+	Alkaloids	0.965	Tryptophan alkaloids	0.256	Simple oxindole alkaloids	0.104	Organic oxygen compounds	1	Organooxygen compounds	1	Carbonyl compounds	0.815	Ketones	0.69	Alkyl-phenylketones	0.512	Organic compounds; Ketones; Organic acids and derivatives; Carboxylic acids and derivatives; Organonitrogen compounds; Benzoyl derivatives; Organooxygen compounds; Carboxylic acid amides; Carboxylic acid derivatives; Monocarboxylic acids and derivatives; Secondary carboxylic acid amides; Carbonyl compounds; Benzene and substituted derivatives; Benzenoids; Beta-hydroxy ketones; Aryl ketones; Organ…		471	738918420249131941	735853449192020554
4207	463	0.90555	0.00275942	290.079	7.977	1	C10H15N3O5S	[M + H]+	C10H16N3O5S+	Amino acids and Peptides	0.748	Small peptides	0.499	Imidazole alkaloids	0.385	Organic 1,3-dipolar compounds	0.636	Allyl-type 1,3-dipolar organic compounds	0.54	Organic nitro compounds	0.579	C-nitro compounds	0.51	C-nitro compounds	0.51	Organic compounds; Organosulfur compounds; Organic acids and derivatives; Carboxylic acids and derivatives; Organonitrogen compounds; Organooxygen compounds; Organic nitro compounds; Carboxylic acids; Carbonyl compounds; Organic 1,3-dipolar compounds; Allyl-type 1,3-dipolar organic compounds; Propargyl-type 1,3-dipolar organic compounds; Organic oxides; C-nitro compounds; Hydrocarbon derivatives;…		479	742884324034601294	735853464182463730
4238	-1	0.946689	3.24351e-05	316.097	8.024	1	C12H17N3O5S	[M + H]+	C12H18N3O5S+	Alkaloids	0.381	Oligopeptides	0.019	Cyclamides	0.05	Benzenoids	0.685							Benzenoids	0.685	Organic compounds; Organoheterocyclic compounds; Organosulfur compounds; Organic acids and derivatives; Organosulfonic acids and derivatives; Organonitrogen compounds; Organooxygen compounds; Sulfonyls; Benzenoids; Aminosulfonyl compounds; Organic oxides; Azacyclic compounds; Hydrocarbon derivatives; Organic sulfonic acids and derivatives; Organopnictogen compounds; Organic oxygen compounds; Orga…		481	742823816741858364	735853489423786277
4243	-1	0.964355	1.37023e-06	330.149	8.032	1	C22H19NO2	[M + H]+	C22H20NO2+	Shikimates and Phenylpropanoids	0.92	Tryptophan alkaloids	0.173	Pyrrole alkaloids	0.031	Benzenoids	1	Phenols	0.941	1-hydroxy-2-unsubstituted benzenoids	0.96			1-hydroxy-2-unsubstituted benzenoids	0.96	Organic compounds; Organoheterocyclic compounds; Phenols; Organonitrogen compounds; Organooxygen compounds; Benzene and substituted derivatives; Benzenoids; Azacyclic compounds; Hydrocarbon derivatives; Organopnictogen compounds; Organic oxygen compounds; 1-hydroxy-2-unsubstituted benzenoids; Organic nitrogen compounds; Chemical entities		482	741698577763234365	735853496952562342
4251	28	0.940928	7.23767e-05	410.165	8.038	1	C15H25N5O7	[M + Na]+	C15H25N5NaO7+	Carbohydrates	0.915	Nucleosides	0.693	Purine nucleosides	0.404	Organic oxygen compounds	0.999	Organooxygen compounds	0.993	Carbohydrates and carbohydrate conjugates	0.911	Glycosyl compounds	0.878	Glycosylamines	0.902	Organic compounds; Organoheterocyclic compounds; Carbohydrates and carbohydrate conjugates; Pyrimidines and pyrimidine derivatives; Alcohols and polyols; Purines and purine derivatives; Organonitrogen compounds; Primary alcohols; Nucleosides, nucleotides, and analogues; Organooxygen compounds; Aminopyrimidines and derivatives; Diazines; Pentoses; Monosaccharides; Secondary alcohols; Imidazopyrimi…		482	740947463696647186	735853553596640428
4294	28	0.902889	0.00341664	364.285	8.073	1	C22H37NO3	[M + H]+	C22H38NO3+	Alkaloids	0.921	Pseudoalkaloids (transamidation)	0.461	Phenylalanine-derived alkaloids	0.336	Benzenoids	0.998	Phenols	0.951	1-hydroxy-2-unsubstituted benzenoids	0.969			1-hydroxy-2-unsubstituted benzenoids	0.969	Organic compounds; Alcohols and polyols; Phenols; Organonitrogen compounds; Organooxygen compounds; Secondary alcohols; 1,2-aminoalcohols; Dialkylamines; Benzene and substituted derivatives; Benzenoids; Amines; Secondary amines; Alkanolamines; Aralkylamines; Hydrocarbon derivatives; Organopnictogen compounds; Organic oxygen compounds; 1-hydroxy-2-unsubstituted benzenoids; Organic nitrogen compoun…		484	742885994428754990	735853522193884980
4306	-1	0.915936	0.00112364	302.08	8.095	1	C19H11NO3	[M + H]+	C19H12NO3+	Alkaloids	0.917	Tyrosine alkaloids	0.405	Isoquinoline alkaloids	0.168	Benzenoids	0.991	Naphthalenes	0.576					Naphthalenes	0.576	Organic compounds; Organoheterocyclic compounds; Naphthalenes; Pyridines and derivatives; Ketones; Organic acids and derivatives; Organonitrogen compounds; Organooxygen compounds; Carbonyl compounds; Benzenoids; Organic oxides; Azacyclic compounds; Heteroaromatic compounds; Hydrocarbon derivatives; Organopnictogen compounds; Organic oxygen compounds; Organic nitrogen compounds; Chemical entities		486	742877739828756946	735853474496257691
4380	28	0.954124	9.98803e-06	517.212	8.138	1	C33H28N2O4	[M + H]+	C33H29N2O4+	Alkaloids	0.736	Tryptophan alkaloids	0.328	Aminoacids	0.061	Organic acids and derivatives	0.998	Carboxylic acids and derivatives	0.997	Amino acids, peptides, and analogues	0.961	Amino acids and derivatives	0.96	Alpha amino acids and derivatives	0.958	Organic compounds; Organoheterocyclic compounds; Amino acids, peptides, and analogues; Alpha amino acids and derivatives; Pyrroles; Alkyl aryl ethers; Indoles and derivatives; Ethers; Organic acids and derivatives; Carboxylic acids and derivatives; Organonitrogen compounds; Organooxygen compounds; Amino acids and derivatives; Carboxylic acid derivatives; Monocarboxylic acids and derivatives; Carb…		488	739204303321539715	735853603164927530
4436	83	0.937148	0.00011745	426.134	8.157	1	C26H19NO5	[M + H]+	C26H20NO5+	Shikimates and Phenylpropanoids	0.583	Chromanes	0.444	Chromones	0.342	Benzenoids	0.999	Phenol ethers	0.649					Phenol ethers	0.649	Organic compounds; Organoheterocyclic compounds; Alkyl aryl ethers; Ethers; Organic acids and derivatives; Carboxylic acids and derivatives; Organonitrogen compounds; Organooxygen compounds; Carboxylic acid amides; Carboxylic acid derivatives; Secondary carboxylic acid amides; Carbonyl compounds; Benzene and substituted derivatives; Phenol ethers; Benzenoids; Organic oxides; Oxacyclic compounds; …		489	742829685319743229	735853564531191491
4439	-1	0.949282	2.19472e-05	448.116	8.179	1	C26H19NO5	[M + Na]+	C26H19NNaO5+	Shikimates and Phenylpropanoids	0.872	Coumarins	0.686	Simple coumarins	0.835	Phenylpropanoids and polyketides	0.699	Coumarins and derivatives	0.763					Coumarins and derivatives	0.763	Organic compounds; Organoheterocyclic compounds; Lactones; Pyrans; Benzopyrans; Coumarins and derivatives; Ethers; Phenylpropanoids and polyketides; Organic acids and derivatives; Carboxylic acids and derivatives; Organonitrogen compounds; Benzodioxoles; Organooxygen compounds; Carboxylic acid amides; Pyranones and derivatives; Carboxylic acid derivatives; Acetals; Secondary carboxylic acid amide…		491	742822444109735261	735853574958231745
4505	472	0.967197	7.11205e-07	623.254	8.248	1	C28H38N4O12	[M + H]+	C28H39N4O12+	Amino acids and Peptides	0.962	Oligopeptides	0.496	Cyclic peptides	0.153	Organic acids and derivatives	0.972	Carboxylic acids and derivatives	0.962	Amino acids, peptides, and analogues	0.703	Peptides	0.637	Peptides	0.637	Organic compounds; Organoheterocyclic compounds; Carbohydrates and carbohydrate conjugates; Lipids and lipid-like molecules; Amino acids, peptides, and analogues; Alpha amino acids and derivatives; Alcohols and polyols; Organic acids and derivatives; Carboxylic acids and derivatives; Organonitrogen compounds; Primary alcohols; Organooxygen compounds; Fatty amides; Amino acids and derivatives; Pep…		495	740999783268582965	735853640901082254
4527	28	0.93382	0.000175594	376.083	8.259	1	C15H19Cl2N3O4	[M + H]+	C15H20Cl2N3O4+	Amino acids and Peptides	0.862	Oligopeptides	0.866	Pyrrolidine alkaloids	0.096	Organic acids and derivatives	0.863	Carboxylic acids and derivatives	0.853	Amino acids, peptides, and analogues	0.745	Amino acids and derivatives	0.729	Alpha amino acids and derivatives	0.631	Organic compounds; Amino acids, peptides, and analogues; Alpha amino acids and derivatives; Alcohols and polyols; Organic acids and derivatives; Carboxylic acids and derivatives; Organohalogen compounds; Organonitrogen compounds; Organooxygen compounds; Amino acids and derivatives; Carboxylic acid amides; Alkyl chlorides; Carboxylic acid derivatives; Organic nitro compounds; Organic oxoazanium co…		496	739267766370685954	735853530670573704
4533	28	0.928952	0.000305035	395.175	8.267	1	C18H26N4O4S	[M + H]+	C18H27N4O4S+	Amino acids and Peptides	0.934	Oligopeptides	0.366	Dipeptides	0.209	Organic acids and derivatives	0.827	Carboxylic acids and derivatives	0.72	Amino acids, peptides, and analogues	0.79	Amino acids and derivatives	0.774	Alpha amino acids and derivatives	0.826	Organic compounds; Organoheterocyclic compounds; Organosulfur compounds; Amino acids, peptides, and analogues; Alpha amino acids and derivatives; Organic acids and derivatives; Carboxylic acids and derivatives; Organonitrogen compounds; Organooxygen compounds; Amino acids and derivatives; Monoalkylamines; Thioethers; Carbonyl compounds; Benzene and substituted derivatives; Benzenoids; Amines; Pri…		496	739268104758744510	735853542519483074
4539	28	0.96073	2.93966e-06	374.175	8.271	1	C24H23NO3	[M + H]+	C24H24NO3+	Alkaloids	0.835	Stilbenoids	0.099	Oligomeric stibenes	0.045	Benzenoids	1	Phenols	0.973	1-hydroxy-2-unsubstituted benzenoids	0.976			1-hydroxy-2-unsubstituted benzenoids	0.976	Organic compounds; Organoheterocyclic compounds; Phenols; Phenylpropanoids and polyketides; Organonitrogen compounds; Organooxygen compounds; Benzene and substituted derivatives; Benzenoids; Amines; Aralkylamines; Azacyclic compounds; Hydrocarbon derivatives; Organopnictogen compounds; Organic oxygen compounds; 1-hydroxy-2-unsubstituted benzenoids; 1-hydroxy-4-unsubstituted benzenoids; Organic ni…		496	739201502902198141	735853528363706454
4543	28	0.972894	1.57419e-07	375.178	8.273	1	C17H22N6O4	[M + H]+	C17H23N6O4+	Amino acids and Peptides	0.733	Small peptides	0.425	Dipeptides	0.113	Organic 1,3-dipolar compounds	0.785	Allyl-type 1,3-dipolar organic compounds	0.802	Organic nitro compounds	0.771	C-nitro compounds	0.695	Nitroaromatic compounds	0.54	Organic compounds; Organoheterocyclic compounds; Phenols; Organic acids and derivatives; Organonitrogen compounds; Organooxygen compounds; Organic nitro compounds; Organic oxoazanium compounds; Benzene and substituted derivatives; Benzenoids; Amines; Organic 1,3-dipolar compounds; Allyl-type 1,3-dipolar organic compounds; Propargyl-type 1,3-dipolar organic compounds; Aralkylamines; Organic oxides…		496	738915311695246537	735853530125314159
4546	28	0.977938	3.08031e-08	268.133	8.271	1	C9H21N3O4S	[M + H]+	C9H22N3O4S+	Amino acids and Peptides	0.707	Histidine alkaloids	0.351	Imidazole alkaloids	0.352	Organic acids and derivatives	0.7	Carboxylic acids and derivatives	0.358	Carboxylic acids	0.611			Carboxylic acids	0.611	Organic compounds; Organosulfur compounds; Organic acids and derivatives; Organonitrogen compounds; Organooxygen compounds; Carboxylic acids; Carbonyl compounds; Amines; Organic oxides; Hydrocarbon derivatives; Organopnictogen compounds; Organic oxygen compounds; Organic nitrogen compounds; Chemical entities		496	738892917903521575	735853449628228190
4555	28	0.91867	0.000870135	412.321	8.281	1	C27H41NO2	[M + H]+	C27H42NO2+	Alkaloids	0.911	Tyrosine alkaloids	0.284	Phenylethylamines	0.365	Benzenoids	1	Phenols	0.969	1-hydroxy-2-unsubstituted benzenoids	0.979			1-hydroxy-2-unsubstituted benzenoids	0.979	Organic compounds; Phenols; Organonitrogen compounds; Organooxygen compounds; Dialkylamines; Benzene and substituted derivatives; Benzenoids; Amines; Secondary amines; Alkanolamines; Aralkylamines; Hydrocarbon derivatives; Organopnictogen compounds; Organic oxygen compounds; 1-hydroxy-2-unsubstituted benzenoids; 1-hydroxy-4-unsubstituted benzenoids; Organic nitrogen compounds; Chemical entities		497	742874234816674772	735853554624244958
4662	28	0.93614	0.000132967	280.133	8.348	1	C18H17NO2	[M + H]+	C18H18NO2+	Alkaloids	0.887	Tryptophan alkaloids	0.287	Simple indole alkaloids	0.103	Organoheterocyclic compounds	0.947	Indoles and derivatives	0.526					Indoles and derivatives	0.526	Organic compounds; Organoheterocyclic compounds; Indoles and derivatives; Organonitrogen compounds; Organooxygen compounds; Benzene and substituted derivatives; Benzenoids; Organic oxides; Azacyclic compounds; Heteroaromatic compounds; Hydrocarbon derivatives; Organopnictogen compounds; Organic oxygen compounds; Organic nitrogen compounds; Chemical entities		501	739267379085431336	735853457396079553
4679	-1	0.911678	0.00164566	423.202	8.424	1	C23H26N4O4	[M + H]+	C23H27N4O4+	Amino acids and Peptides	0.813	Small peptides	0.826	Carboline alkaloids	0.591	Organic acids and derivatives	1	Carboxylic acids and derivatives	1	Amino acids, peptides, and analogues	0.995	Peptides	0.511	Peptides	0.511	Organic compounds; Organoheterocyclic compounds; Amino acids, peptides, and analogues; Alpha amino acids and derivatives; Pyrrolidines; Organic acids and derivatives; Carboxylic acids and derivatives; Organonitrogen compounds; Organooxygen compounds; Amino acids and derivatives; Peptides; Carboxylic acid amides; Carboxylic acid derivatives; Monocarboxylic acids and derivatives; N-acyl-alpha amino…		505	738554345449452831	735853563730079387
4814	-1	0.915164	0.00120589	293.194	8.564	1	C13H26N4O2	[M + Na]+	C13H26N4NaO2+	Alkaloids	0.677	Small peptides	0.281	Tripeptides	0.162	Organic acids and derivatives	0.981	Carboxylic acids and derivatives	0.973	Carboxylic acid derivatives	0.951	Carboxylic acid amides	0.931	Secondary carboxylic acid amides	0.767	Organic compounds; Organic acids and derivatives; Carboxylic acids and derivatives; Organonitrogen compounds; Organooxygen compounds; Guanidines; Carboxylic acid amides; Carboxylic acid derivatives; Secondary carboxylic acid amides; Carbonyl compounds; Carboximidamides; Organic 1,3-dipolar compounds; Propargyl-type 1,3-dipolar organic compounds; Acetamides; Organic oxides; Hydrocarbon derivatives…		514	740945172193181512	735853468708117901
4908	-1	0.915571	0.00116196	446.1	8.566	1	C23H21NO6	[M + K]+	C23H21KNO6+	Shikimates and Phenylpropanoids	0.497	Anthranilic acid alkaloids	0.172	Simple coumarins	0.129	Benzenoids	0.998	Benzene and substituted derivatives	0.932	Anilides	0.536			Anilides	0.536	Organic compounds; Organoheterocyclic compounds; Alkyl aryl ethers; Anisoles; Ethers; Organic acids and derivatives; Carboxylic acids and derivatives; Organonitrogen compounds; Anilides; Benzoyl derivatives; Organooxygen compounds; Carboxylic acid amides; Carboxylic acid derivatives; Secondary carboxylic acid amides; Carbonyl compounds; Benzene and substituted derivatives; Phenol ethers; Benzenoi…		514	742880104908703281	735853573813186688
5088	-1	0.942179	6.1231e-05	422.102	8.671	1	C21H18FNO6	[M + Na]+	C21H18FNNaO6+	Amino acids and Peptides	0.65	Small peptides	0.205	Dipeptides	0.019	Organic acids and derivatives	1	Carboxylic acids and derivatives	0.999	Amino acids, peptides, and analogues	0.976	Amino acids and derivatives	0.975	Alpha amino acid esters	0.655	Organic compounds; Organoheterocyclic compounds; Amino acids, peptides, and analogues; Halobenzenes; Alpha amino acids and derivatives; Benzoic acids and derivatives; Benzamides; Hippuric acids and derivatives; Organic acids and derivatives; Carboxylic acids and derivatives; Organohalogen compounds; Organonitrogen compounds; Benzoyl derivatives; Organooxygen compounds; Amino acids and derivatives…		520	742743690628880325	735853562408873582
5089	517	0.95019	1.90492e-05	444.084	8.671	1	C26H15NO5	[M + Na]+	C26H15NNaO5+	Shikimates and Phenylpropanoids	0.775	Flavonoids	0.696	Simple coumarins	0.344	Benzenoids	0.999	Benzene and substituted derivatives	0.98	Benzoyl derivatives	0.567			Benzoyl derivatives	0.567	Organic compounds; Organoheterocyclic compounds; Phenylpropanoids and polyketides; Organic acids and derivatives; Carboxylic acids and derivatives; Organonitrogen compounds; Benzoyl derivatives; Organooxygen compounds; Carboxylic acid derivatives; Benzene and substituted derivatives; Benzenoids; Organic oxides; Oxacyclic compounds; Heteroaromatic compounds; Hydrocarbon derivatives; Organopnictoge…		520	738549170521369981	735853573163069538
5099	472	0.99248	5.87119e-12	609.275	8.668	1	C35H39FN2O5	[M + Na]+	C35H39FN2NaO5+	Alkaloids	0.94	Tryptophan alkaloids	0.458	Isoquinoline alkaloids	0.228	Organoheterocyclic compounds	0.834	Indoles and derivatives	0.326	Indoles	0.309	3-alkylindoles	0.606	3-alkylindoles	0.606	Organic compounds; Organoheterocyclic compounds; Halobenzenes; Alkyl aryl ethers; Ethers; Organohalogen compounds; Organonitrogen compounds; Organooxygen compounds; Aryl fluorides; Fluorobenzenes; Organofluorides; Dialkylamines; Benzene and substituted derivatives; Phenol ethers; Benzenoids; Amines; Secondary amines; Aryl halides; Aralkylamines; Azacyclic compounds; Hydrocarbon derivatives; 3-alk…		520	738881615789355477	735853635209411486
5257	28	0.921829	0.000640242	305.1	8.741	1	C12H12N6O4	[M + H]+	C12H13N6O4+	Amino acids and Peptides	0.324	Pseudoalkaloids (transamidation)	0.224	Purine alkaloids	0.526	Organoheterocyclic compounds	0.991	Pteridines and derivatives	0.861	Pterins and derivatives	0.757			Pterins and derivatives	0.757	Organic compounds; Organoheterocyclic compounds; Pyrimidines and pyrimidine derivatives; Pteridines and derivatives; Pterins and derivatives; Organic acids and derivatives; Carboxylic acids and derivatives; Organonitrogen compounds; Pyrimidones; Organooxygen compounds; Aminopyrimidines and derivatives; Diazines; Benzenoids; Amines; Primary amines; Vinylogous amides; Organic oxides; Azacyclic comp…		524	739269024246650864	735853476845068041
5389	-1	0.932622	0.000201913	395.138	8.831	1	C25H18N2O3	[M + H]+	C25H19N2O3+	Alkaloids	0.579	Anthranilic acid alkaloids	0.434	Quinoline alkaloids	0.118	Benzenoids	1	Benzene and substituted derivatives	0.976					Benzene and substituted derivatives	0.976	Organic compounds; Organoheterocyclic compounds; Lactams; Organic acids and derivatives; Carboxylic acids and derivatives; Organonitrogen compounds; Organooxygen compounds; Carboxylic acid derivatives; Benzene and substituted derivatives; Benzenoids; Organic oxides; Azacyclic compounds; Heteroaromatic compounds; Hydrocarbon derivatives; Organopnictogen compounds; Organic oxygen compounds; Organic…		530	742858306313884429	735853542423014077
5486	31	0.944804	4.25775e-05	415.107	8.885	1	C27H14N2O3	[M + H]+	C27H15N2O3+	Alkaloids	0.803	Tryptophan alkaloids	0.215	Carbazole alkaloids	0.098	Benzenoids	0.997	Benzene and substituted derivatives	0.844					Benzene and substituted derivatives	0.844	Organic compounds; Organoheterocyclic compounds; Organic acids and derivatives; Carboxylic acids and derivatives; Organonitrogen compounds; Organooxygen compounds; Carboxylic acid derivatives; Carboxylic acids; Benzene and substituted derivatives; Benzenoids; Organic oxides; Azacyclic compounds; Heteroaromatic compounds; Hydrocarbon derivatives; Organopnictogen compounds; Organic oxygen compounds…		533	742827364636504391	735853556054502692
5578	83	0.937086	0.000118355	412.145	8.941	1	C16H21N5O8	[M + H]+	C16H22N5O8+	Carbohydrates	0.784	Nucleosides	0.53	Dipeptides	0.228	Organic acids and derivatives	0.981	Carboxylic acids and derivatives	0.929	Amino acids, peptides, and analogues	0.64	Amino acids and derivatives	0.631	N-acyl-alpha amino acids and derivatives	0.65	Organic compounds; Amino acids, peptides, and analogues; Alpha amino acids and derivatives; Alcohols and polyols; Benzoic acids and derivatives; Benzamides; Hippuric acids and derivatives; Organic acids and derivatives; Carboxylic acids and derivatives; Organonitrogen compounds; Benzoyl derivatives; Organooxygen compounds; Amino acids and derivatives; Carboxylic acid amides; Carboxylic acid deriv…		536	742830232546393818	735853554397752532
5580	315	0.930334	0.000261824	432.12	8.943	1	C26H19NO4	[M + Na]+	C26H19NNaO4+	Alkaloids	0.533	Coumarins	0.132	Simple coumarins	0.13	Organoheterocyclic compounds	0.977	Tetrahydroisoquinolines	0.724					Tetrahydroisoquinolines	0.724	Organic compounds; Organoheterocyclic compounds; Organic acids and derivatives; Carboxylic acids and derivatives; Organonitrogen compounds; Organooxygen compounds; Carboxylic acid amides; Carboxylic acid derivatives; Monocarboxylic acids and derivatives; Carboxylic acid esters; Tertiary carboxylic acid amides; Benzene and substituted derivatives; Benzenoids; Tetrahydroisoquinolines; Organic oxide…		537	742859835666175973	735853566997442373
5581	83	0.932725	0.000199525	410.138	8.942	1	C26H19NO4	[M + H]+	C26H20NO4+	Shikimates and Phenylpropanoids	0.816	Flavonoids	0.294	Simple coumarins	0.291	Benzenoids	0.999	Benzene and substituted derivatives	0.978	Phenethylamines	0.597	Amphetamines and derivatives	0.557	Amphetamines and derivatives	0.557	Organic compounds; Organoheterocyclic compounds; Ketones; Phenethylamines; Amphetamines and derivatives; Phenylpropanoids and polyketides; Organic acids and derivatives; Carboxylic acids and derivatives; Organonitrogen compounds; Benzoyl derivatives; Organooxygen compounds; Carboxylic acid amides; Carboxylic acid derivatives; Carbonyl compounds; Benzene and substituted derivatives; Benzenoids; Ar…		537	742835320052604208	735853553491782823
5713	-1	0.905268	0.00282341	430.165	9.06	1	C19H26FN5O3	[M + K]+	C19H26FKN5O3+	Alkaloids	0.471	Small peptides	0.282	Carboline alkaloids	0.028	Organic acids and derivatives	0.927	Carboxylic acids and derivatives	0.884	Amino acids, peptides, and analogues	0.574	Amino acids and derivatives	0.569	Amino acids and derivatives	0.569	Organic compounds; Organoheterocyclic compounds; Amino acids, peptides, and analogues; Halobenzenes; Organic acids and derivatives; Carboxylic acids and derivatives; Organohalogen compounds; Organonitrogen compounds; Organooxygen compounds; Amino acids and derivatives; Azoles; Carboxylic acid amides; Aryl fluorides; Carboxylic acid derivatives; Fluorobenzenes; Organofluorides; Secondary carboxyli…		544	742885127407396307	735853566296993570
5901	28	0.970425	3.13733e-07	500.185	9.187	1	C22H30F3NO7	[M + Na]+	C22H30F3NNaO7+	Alkaloids	0.289	Ornithine alkaloids	0.326	Phenylethylamines	0.402	Organic acids and derivatives	0.73	Carboxylic acids and derivatives	0.703	Amino acids, peptides, and analogues	0.541	Amino acids and derivatives	0.542	Amino acids and derivatives	0.542	Organic compounds; Amino acids, peptides, and analogues; Alcohols and polyols; Ethers; Organic acids and derivatives; Carboxylic acids and derivatives; Organohalogen compounds; Organonitrogen compounds; Organooxygen compounds; Amino acids and derivatives; Alkyl fluorides; Carboxylic acids; Organofluorides; Secondary alcohols; Carbonyl compounds; Dialkylamines; Benzene and substituted derivatives;…		551	738917621418768647	735853598177899824
5903	-1	0.971493	2.34552e-07	394.144	9.186	1	C18H23N3O5S	[M + H]+	C18H24N3O5S+	Amino acids and Peptides	0.957	Small peptides	0.396	Dipeptides	0.193	Organic acids and derivatives	0.996	Carboxylic acids and derivatives	0.906	Amino acids, peptides, and analogues	0.507	Amino acids and derivatives	0.503	Amino acids and derivatives	0.503	Organic compounds; Organoheterocyclic compounds; Organosulfur compounds; Amino acids, peptides, and analogues; Benzenesulfonamides; Benzoic acids and derivatives; Organic acids and derivatives; Carboxylic acids and derivatives; Organosulfonic acids and derivatives; Organonitrogen compounds; Organooxygen compounds; Amino acids and derivatives; Carboxylic acid amides; Carboxylic acid derivatives; S…		551	742792702165842199	735853541407992459
5914	-1	0.940302	7.85853e-05	249.091	9.199	1	C17H12O2	[M + H]+	C17H13O2+	Shikimates and Phenylpropanoids	0.86	Flavonoids	0.757	Chalcones	0.469	Benzenoids	1	Indanes	0.327	Indanones	0.664	Indanediones	0.715	Indanediones	0.715	Organic compounds; Naphthalenes; Indanediones; Ketones; Organooxygen compounds; Indanones; Carbonyl compounds; Benzene and substituted derivatives; Benzenoids; Aryl ketones; Organic oxides; Hydrocarbon derivatives; Organic oxygen compounds; Chemical entities		552	742828480694662200	735853428019173402
6051	12	0.923844	0.000522937	398.078	9.295	1	C21H16ClNO5	[M + H]+	C21H17ClNO5+	Shikimates and Phenylpropanoids	0.469	Flavonoids	0.177	Simple coumarins	0.267	Benzenoids	0.996	Benzene and substituted derivatives	0.915	Benzoic acids and derivatives	0.516			Benzoic acids and derivatives	0.516	Organic compounds; Organoheterocyclic compounds; Halobenzenes; Benzoic acids and derivatives; Organic acids and derivatives; Carboxylic acids and derivatives; Organohalogen compounds; Organonitrogen compounds; Benzoyl derivatives; Organooxygen compounds; Aryl chlorides; Carboxylic acid derivatives; Chlorobenzenes; Monocarboxylic acids and derivatives; Organochlorides; Carbonyl compounds; Benzene …		558	742870696745086777	735853545367415625
6635	-1	0.935381	0.000145796	368.128	9.674	1	C24H17NO3	[M + H]+	C24H18NO3+	Alkaloids	0.485	Tryptophan alkaloids	0.242	Quinoline alkaloids	0.324	Organoheterocyclic compounds	0.915	Quinolines and derivatives	0.544					Quinolines and derivatives	0.544	Organic compounds; Organoheterocyclic compounds; Lactams; Organic acids and derivatives; Carboxylic acids and derivatives; Organonitrogen compounds; Organooxygen compounds; Carboxylic acid derivatives; Quinolines and derivatives; Carbonyl compounds; Benzene and substituted derivatives; Benzenoids; Organic oxides; Azacyclic compounds; Hydrocarbon derivatives; Organopnictogen compounds; Organic oxy…		580	742832113570107358	735853524081321875
6679	-1	0.926969	0.000377774	291.065	9.712	1	C12H16Cl2N2O2	[M + H]+	C12H17Cl2N2O2+	Alkaloids	0.498	Small peptides	0.68	Dipeptides	0.342	Benzenoids	0.674	Benzene and substituted derivatives	0.764	Halobenzenes	0.662	Chlorobenzenes	0.667	Chlorobenzenes	0.667	Organic compounds; Halobenzenes; Organic acids and derivatives; Carboxylic acids and derivatives; Organohalogen compounds; Organonitrogen compounds; Organooxygen compounds; Alkyl chlorides; Chlorobenzenes; Organochlorides; Carbonyl compounds; Benzene and substituted derivatives; Benzenoids; Alkyl halides; Organic oxides; Hydrocarbon derivatives; Organopnictogen compounds; Organic oxygen compounds…		583	742866275730564584	735853466560634153
6680	28	0.937862	0.00010744	408.123	9.709	1	C26H17NO4	[M + H]+	C26H18NO4+	Shikimates and Phenylpropanoids	0.718	Flavonoids	0.571	Simple coumarins	0.26	Benzenoids	0.999	Benzene and substituted derivatives	0.982	Benzoic acids and derivatives	0.518	Benzamides	0.513	Benzamides	0.513	Organic compounds; Organoheterocyclic compounds; Ketones; Benzoic acids and derivatives; Benzamides; Organic acids and derivatives; Carboxylic acids and derivatives; Organonitrogen compounds; Benzoyl derivatives; Organooxygen compounds; Carboxylic acid amides; Carboxylic acid derivatives; Secondary carboxylic acid amides; Carbonyl compounds; Benzene and substituted derivatives; Benzenoids; Aryl k…		583	739266871566258272	735853552363514987
8769	-1	0.918852	0.000855209	467.334	10.665	1	C25H46BNO4S	[M + H]+	C25H47BNO4S+	Polyketides	0.332	Oligopeptides	0.424	Open-chain polyketides	0.237	Organic acids and derivatives	0.989	Carboxylic acids and derivatives	0.898	Carboxylic acid derivatives	0.85	Carboxylic acid amides	0.686	Secondary carboxylic acid amides	0.726	Organic compounds; Organoheterocyclic compounds; Organosulfur compounds; Organic acids and derivatives; Carboxylic acids and derivatives; Organonitrogen compounds; Organooxygen compounds; Organometallic compounds; Carboxylic acid amides; Boronic acid derivatives; Carboxylic acid derivatives; Organometalloid compounds; Secondary carboxylic acid amides; Carbonyl compounds; Organoboron compounds; Or…		640	742873890724363060	735853583208428138

## Sheet: Table S4
Table S4 Genome assemblies QUAST statistics.
Statistics without reference	Salinibacterium_sp._AL4.1	Salinibacterium_sp._VpJ6
# contigs	4	6
# contigs (>= 0 bp)	5	7
# contigs (>= 1000 bp)	4	6
# contigs (>= 5000 bp)	4	4
# contigs (>= 10000 bp)	3	4
# contigs (>= 25000 bp)	3	4
# contigs (>= 50000 bp)	3	4
Largest contig	1944804	1833351
Total length	2864537	2665788
Total length (>= 0 bp)	2864689	2666044
Total length (>= 1000 bp)	2864537	2665788
Total length (>= 5000 bp)	2864537	2659954
Total length (>= 10000 bp)	2858643	2659954
Total length (>= 25000 bp)	2858643	2659954
Total length (>= 50000 bp)	2858643	2659954
N50	1944804	1833351
N90	665243	240314
auN	1496453	1351277
L50	1	1
L90	2	3
GC (%)	61.8	61.65
Per base quality
# N's per 100 kbp	0	0
# N's	0	0

## Sheet: Table S5
Table S5 Type Strain Genome Server derived dDDH values for genomes of strains AL4.1 and VpJ6 against closest types trains genomes.
Query strain	Subject strain	dDDH (d0, in %)	C.I. (d0, in %)	dDDH (d4, in %)	C.I. (d4, in %)	dDDH (d6, in %)	C.I. (d6, in %)	G+C content difference (in %)
'Salinibacterium sp. VpJ6'	Salinibacterium amurskyense JCM 12362	76.8	[72.9 - 80.4]	68.4	[65.4 - 71.2]	78	[74.5 - 81.1]	0.23
'Salinibacterium sp. VpJ6'	Salinibacterium amurskyense DSM 16400	76.8	[72.9 - 80.4]	68.4	[65.4 - 71.2]	78	[74.5 - 81.1]	0.23
'Salinibacterium sp. VpJ6'	Salinibacterium amurskyense KCTC 9931	76.8	[72.8 - 80.4]	68.4	[65.4 - 71.3]	77.9	[74.5 - 81.0]	0.23
'Salinibacterium sp. AL4.1'	Salinibacterium amurskyense KCTC 9931	84	[80.2 - 87.1]	48.5	[45.9 - 51.1]	78.3	[74.9 - 81.4]	0.09
'Salinibacterium sp. AL4.1'	Salinibacterium amurskyense JCM 12362	84	[80.2 - 87.2]	48.5	[45.9 - 51.1]	78.3	[74.9 - 81.4]	0.08
'Salinibacterium sp. AL4.1'	Salinibacterium amurskyense DSM 16400	84	[80.2 - 87.2]	48.5	[45.9 - 51.1]	78.4	[74.9 - 81.4]	0.08
'Salinibacterium sp. AL4.1'	'Salinibacterium sp. VpJ6'	70.5	[66.6 - 74.2]	48.2	[45.6 - 50.8]	67.2	[63.8 - 70.4]	0.15
'Salinibacterium sp. VpJ6'	Rhodoglobus aureus JCM 12762	37.3	[34.0 - 40.8]	22.8	[20.5 - 25.3]	32.4	[29.4 - 35.5]	1.6
'Salinibacterium sp. AL4.1'	Rhodoglobus aureus JCM 12762	33.8	[30.5 - 37.4]	22.6	[20.3 - 25.0]	29.9	[27.0 - 33.0]	1.75
'Salinibacterium sp. VpJ6'	Leifsonia rubra CMS 76r	27.8	[24.5 - 31.5]	21.6	[19.4 - 24.1]	25.4	[22.5 - 28.5]	2.41
'Salinibacterium sp. VpJ6'	Rhodoglobus vestalii DSM 21947	28.2	[24.8 - 31.8]	21.6	[19.4 - 24.1]	25.7	[22.8 - 28.8]	1.86
'Salinibacterium sp. AL4.1'	Leifsonia rubra CMS 76r	27.3	[24.0 - 31.0]	21.5	[19.3 - 23.9]	25	[22.1 - 28.1]	2.55
'Salinibacterium sp. AL4.1'	Rhodoglobus vestalii DSM 21947	28.1	[24.8 - 31.7]	21.5	[19.2 - 23.9]	25.5	[22.7 - 28.7]	2
'Salinibacterium sp. AL4.1'	Salinibacterium hongtaonis CGMCC 1.16371	13.5	[10.7 - 16.8]	20.3	[18.1 - 22.7]	13.8	[11.4 - 16.6]	2.3
'Salinibacterium sp. VpJ6'	Homoserinimonas aerilata DSM 26477	13.6	[10.9 - 17.0]	20	[17.8 - 22.4]	13.9	[11.5 - 16.7]	5.18
'Salinibacterium sp. AL4.1'	Homoserinimonas aerilata DSM 26477	13.6	[10.9 - 17.0]	19.8	[17.6 - 22.2]	13.9	[11.5 - 16.7]	5.03
'Salinibacterium sp. VpJ6'	Salinibacterium hongtaonis CGMCC 1.16371	13.5	[10.8 - 16.9]	19.8	[17.6 - 22.2]	13.8	[11.4 - 16.6]	2.45
'Salinibacterium sp. AL4.1'	Agromyces terreus DSM 22016	13.3	[10.6 - 16.6]	19.4	[17.2 - 21.8]	13.6	[11.2 - 16.4]	9.27
'Salinibacterium sp. AL4.1'	Agromyces terreus JCM 14581	13.3	[10.6 - 16.6]	19.3	[17.1 - 21.7]	13.6	[11.2 - 16.4]	9.32
'Salinibacterium sp. AL4.1'	Salinibacterium xinjiangense CGMCC 1.5381	13.8	[11.0 - 17.1]	19.2	[17.1 - 21.6]	14	[11.6 - 16.8]	2.16
'Salinibacterium sp. VpJ6'	Salinibacterium xinjiangense CGMCC 1.5381	13.9	[11.1 - 17.3]	19.1	[16.9 - 21.5]	14.1	[11.7 - 17.0]	2.31
'Salinibacterium sp. VpJ6'	Agromyces terreus DSM 22016	13.3	[10.6 - 16.7]	19.1	[17.0 - 21.5]	13.7	[11.3 - 16.4]	9.42
'Salinibacterium sp. VpJ6'	Salinibacterium metalliresistens H3M29-4T	13.9	[11.2 - 17.3]	19	[16.9 - 21.4]	14.2	[11.8 - 17.0]	7.45
'Salinibacterium sp. VpJ6'	Agromyces terreus JCM 14581	13.3	[10.6 - 16.7]	19	[16.9 - 21.4]	13.6	[11.3 - 16.4]	9.47
'Salinibacterium sp. AL4.1'	Salinibacterium metalliresistens H3M29-4T	14.2	[11.4 - 17.6]	18.8	[16.6 - 21.2]	14.4	[12.0 - 17.2]	7.3
'Salinibacterium sp. AL4.1'	Agromyces larvae CFWR-12T	13.1	[10.4 - 16.4]	18.4	[16.2 - 20.7]	13.4	[11.0 - 16.2]	9.36
'Salinibacterium sp. AL4.1'	Microcella pacifica KN1116	13.6	[10.8 - 16.9]	18.1	[15.9 - 20.4]	13.8	[11.4 - 16.6]	7.62
'Salinibacterium sp. VpJ6'	Agromyces larvae CFWR-12T	13.2	[10.4 - 16.5]	18	[15.9 - 20.4]	13.5	[11.1 - 16.3]	9.5
'Salinibacterium sp. VpJ6'	Microcella pacifica KN1116	13.5	[10.8 - 16.9]	17.8	[15.7 - 20.2]	13.8	[11.4 - 16.6]	7.77

## Sheet: Table S6
Table S6 ANIb values of strains AL4.1 and VpJ6 against type strains of each Salinibacterium species.
	S. amurskyense DSM 16400	S. hongtaonis CGMCC 1.16371	S. metalliresistens H3M29-4	S. sedimenticola SYSU T00001	S. soli WY-16	S. xinjiangense CGMCC 1.05381	Salinibacterium sp. AL4.1	Salinibacterium sp. VpJ6
S. amurskyense DSM 16400	100	70.19	71.71	70.26	71.69	71.38	92.37	95.74
S. hongtaonis CGMCC 1.16371	70.46	100	71.78	74.63	71.49	70.68	70.29	70.46
S. metalliresistens H3M29-4	71.99	71.44	100	72.67	76.16	74.41	71.97	71.94
S. sedimenticola SYSU T00001	70.28	74.46	72.58	100	72.59	70.99	70.27	70.36
S. soli WY-16	71.74	71.44	76.16	72.6	100	74.02	71.61	71.66
S. xinjiangense CGMCC 1.05381	71.46	70.53	74.3	71.06	73.81	100	71.4	71.51
Salinibacterium sp. AL4.1	92.27	70.06	71.99	70.31	71.83	71.43	100	91.96
Salinibacterium sp. VpJ6	95.88	70.09	71.82	70.23	71.63	71.47	92.2	100

## Sheet: Table S7
Table S7 antiSMASH identified BGCs for strains AL4.1 and VpJ6 and their predicted antibacterial activity probabilities by each classifier.
Strain	antiSMASH BGCs						Probabilities of antibacterial activity
	Region	Type	From	To	Most similar known cluster	Similarity	Random Forest	Logistic Regression	Support Vector Machine
AL4.1	Region 1.1	betalactone	103,517	130,765	microansamycin (Polyketide)	0.07	0.361429	0.235048	0.249036
	Region 1.2	RiPP-like	1,527,128	1,541,389	-	-	0.757576	0.903532	0.861663
	Region 1.3	terpene	1,558,021	1,578,887	kosinostatin (NRP+Polyketide)	0.03	0.46	0.494865	0.348539
	Region 1.4	T3PKS	1,733,162	1,774,220	alkylresorcinol (Polyketide)	1	0.602171	0.708045	0.714148
VpJ6	Region 1.1	T3PKS	171,093	212,148	alkylresorcinol (Polyketide)	1	0.7	0.973098	0.807612
	Region 1.2	terpene	317,260	338,126	carotenoid (Terpene)	0.33	0.44069	0.360029	0.335308
	Region 1.3	betalactone	1,720,130	1,747,377	microansamycin (Polyketide)	0.07	0.361429	0.235048	0.249036

## Sheet: Table S8
Table S8 Structure identifications
structurePerIdRank	formulaRank	ConfidenceScoreExact	ConfidenceScoreApproximate	CSI:FingerIDScore	ZodiacScore	SiriusScoreNormalized	SiriusScore	molecularFormula	adduct	precursorFormula	InChIkey2D	InChI	name	smiles	xlogp	pubchemids	links	dbflags	ionMass	retentionTimeInSeconds	retentionTimeInMinutes	formulaId	alignedFeatureId	mappingFeatureId	overallFeatureQuality
1	1	0.202	0.202	-167671		0.964	23630	C18H14N2O	[M + H]+	C18H15N2O+	IBYIBTVYTZSSQN	InChI=1S/C18H14N2O/c21-13-7-5-12(6-8-13)11-17-18-15(9-10-19-18)14-3-1-2-4-16(14)20-17/h1-10,19,21H,11H2	Marinoquinoline D	C1=CC=C2C(=C1)C3=C(C(=N2)CC4=CC=C(C=C4)O)NC=C3	3900	52952005	COCONUT:(CNP0353222);CHEBI:(67842);SUPERNATURAL:(SN0141504);PUBCHEM:(52952005);LOTUS:(Q27136318);PUBMED	271581282	275118	264	4398	742888223248364418	735853454099356459	1364
1	1	0.121	0.121	-211739		0.943	15858	C27H22N2O2	[M + H]+	C27H23N2O2+	IZTPTYSXRJXWAB	InChI=1S/C27H22N2O2/c30-26-7-3-1-5-22(26)18-28-24-13-9-20(10-14-24)17-21-11-15-25(16-12-21)29-19-23-6-2-4-8-27(23)31/h1-16,18-19,30-31H,17H2	2-{[(4-{4-[(2-Hydroxybenzylidene)amino]benzyl}phenyl)imino]methyl}phenol	C1=CC=C(C(=C1)C=NC2=CC=C(C=C2)CC3=CC=C(C=C3)N=CC4=CC=CC=C4O)O	6417	288550	PUBCHEMANNOTATIONSAFETYANDTOXIC;PUBCHEM:(288550);DSSTox:(DTXSID50422475);PUBMED	137506062402	407175	359	5979	742822968229963711	735853551780506701	1515
1	1	0.163	0.163	-296334		0.941	29548	C28H24N2O5	[M + H]+	C28H25N2O5+	ZBJQTZVNUZNIFW	InChI=1S/C28H24N2O5/c1-33-25-7-3-5-19(17-25)27(31)29-21-9-13-23(14-10-21)35-24-15-11-22(12-16-24)30-28(32)20-6-4-8-26(18-20)34-2/h3-18H,1-2H3,(H,29,31)(H,30,32)	3-methoxy-N-[4-[4-[(3-methoxybenzoyl)amino]phenoxy]phenyl]benzamide	COC1=CC=CC(=C1)C(=O)NC2=CC=C(C=C2)OC3=CC=C(C=C3)NC(=O)C4=CC(=CC=C4)OC	5100	4545284	SUPERNATURAL:(SN0465911);PUBCHEM:(4545284)	1048578	469176	379	6320	742881437069987570	735853584428970637	1635
1	1	0.31	0.31	-145340		0.991	26406	C15H13NO2	[M + H]+	C15H14NO2+	GHZHWDWADLAOIQ	InChI=1S/C15H13NO2/c16-10-13(12-3-7-15(18)8-4-12)9-11-1-5-14(17)6-2-11/h1-8,13,17-18H,9H2	2,3-bis(4-hydroxyphenyl)propanenitrile	C1=CC(=CC=C1CC(C#N)C2=CC=C(C=C2)O)O	2900	6604873;56945585;102614	PUBCHEMANNOTATIONBIO;COCONUT:(CNP0113909);HMDB:(HMDB0244616);PUBCHEMANNOTATIONSAFETYANDTOXIC;BloodExposome:(102614);CHEBI:(63949);SUPERNATURAL:(SN0106259);MESH:(102614);PUBCHEM:(6604873 56945585 102614);DSSTox:(DTXSID0040387);PUBMED	137530179694	240102	396	6602	742773181942129586	735853422201673519	1857
1	6	0.009	0.009	-326055		0	44960	C17H22N2O3	[M + Na]+	C17H22N2NaO3+	HVVQGDFUBWFATB	InChI=1S/C17H22N2O3/c1-12(5-10-15(20)19-4)11-17(2,22)16(21)13-6-8-14(18-3)9-7-13/h5-11,18,22H,1-4H3,(H,19,20)	6-hydroxy-N,4,6-trimethyl-7-[4-(methylamino)phenyl]-7-oxohepta-2,4-dienamide	CC(=CC(C)(C(=O)C1=CC=C(C=C1)NC)O)C=CC(=O)NC	2200	163008977;139588704	COCONUT:(CNP0283856);SUPERNATURAL:(SN0136905);PUBCHEM:(163008977 139588704);LOTUS:(Q105034462)	271581186	325154	399	6655	742834341987047881	735853493840388614	1898
1	1	0.744	0.744	-83264		1000	80421	C12H14N2O2	[M + H]+	C12H15N2O2+	MVAWJSIDNICKHF	InChI=1S/C12H14N2O2/c1-8(15)13-5-4-9-7-14-12-3-2-10(16)6-11(9)12/h2-3,6-7,14,16H,4-5H2,1H3,(H,13,15)	N-Acetylserotonin	CC(=O)NCCC1=CNC2=C1C=C(C=C2)O	1246	76974080;156612477;165111755;131708629;903;451064;18728404;18728409;73707615	PUBCHEMANNOTATIONBIO;HMDB:(HMDB0001238);PUBCHEMANNOTATIONSAFETYANDTOXIC;BloodExposome:(903);SUPERNATURAL:(SN0236124);MESH:(903);FooDB:(FDB031021);PUBCHEM:(76974080 156612477 165111755 131708629 903 451064 18728404 18728409 73707615);GNPS:(CCMSLIB00000085908);COCONUT:(CNP0298476);NORMAN:(NS00014788);METACYC:(N-ACETYL-SEROTONIN);PLANTCYC:(N-ACETYL-SEROTONIN);CHEBI:(125590 17697);KEGG:(C00978);DSSTo…	138369440110	219113	399	6656	742865385707643242	735853399409824803	1892
1	1	0.295	0.295	-218496		0.984	26513	C18H14N2O3	[M + H]+	C18H15N2O3+	SFARCFWYSFBKKO	InChI=1S/C18H14N2O3/c21-17(15-11-10-12-6-4-5-9-14(12)19-15)20-16(18(22)23)13-7-2-1-3-8-13/h1-11,16H,(H,20,21)(H,22,23)	2-Phenyl-2-(quinoline-2-carbonylamino)acetic acid	C1=CC=C(C=C1)C(C(=O)O)NC(=O)C2=NC3=CC=CC=C3C=C2	3100	10946693	PUBCHEM:(10946693)	2	307107	403	6712	742830661502058699	735853480586387369	1963
1	1	0.204	0.204	-101055		1000	37386	C17H12N2O	[M + H]+	C17H13N2O+	OSFGHYZLBDAJTP	InChI=1S/C17H12N2O/c20-17-13(9-11-5-1-4-8-15(11)19-17)16-10-12-6-2-3-7-14(12)18-16/h1-10,18H,(H,19,20)		C1=CC=C2C(=C1)C=C(C(=O)N2)C3=CC4=CC=CC=C4N3	3100	5329371	PUBCHEMANNOTATIONBIO:(null);PUBCHEM:(5329371);PUBMED:(null)	16777282	261102	403	6713	742832849934701561	735853441994594665	1961
1	1	0.14	0.14	-221039		0.778	41571	C20H16N4O3	[M + H]+	C20H17N4O3+	CPHPWDPTMJRIEO	InChI=1S/C20H16N4O3/c1-24-15-10-6-5-9-13(15)18(25)16(20(24)27)17-14(19(26)23-22-17)11-21-12-7-3-2-4-8-12/h2-11,25H,1H3,(H2,22,23,26)	3-(1,2-Dihydro-1-methyl-2-oxo-4-hydroxyquinoline-3-yl)-4-(anilinomethylene)-2-pyrazoline-5-one	CN1C2=CC=CC=C2C(=C(C1=O)C3=C(C(=O)NN3)C=NC4=CC=CC=C4)O	1800	135440942	COCONUT:(CNP0457597);SUPERNATURAL:(SN0236859);PUBCHEM:(135440942)	3145730	361130	406	6771	742883010793822451	735853520268699349	2026
1	1	0.25	0.25	-253000		0.763	18470	C26H23N3O7	[M + H]+	C26H24N3O7+	NCANFMKAAKZYPK	InChI=1S/C26H23N3O7/c1-16(30)28-20-11-9-19(10-12-20)25(32)29-27-15-18-8-13-23(24(14-18)34-3)36-26(33)21-6-4-5-7-22(21)35-17(2)31/h4-15H,1-3H3,(H,28,30)(H,29,32)	Benzoic acid, 2-(acetyloxy)-, 4-(((4-(acetylamino)benzoyl)hydrazono)methyl)-2-methoxyphenyl ester	CC(=O)NC1=CC=C(C=C1)C(=O)NN=CC2=CC(=C(C=C2)OC(=O)C3=CC=CC=C3OC(=O)C)OC	3923	9587892;6446257	PUBCHEMANNOTATIONSAFETYANDTOXIC:(null);PUBCHEM:(9587892 6446257)	67108866	490161	408	6799	742871344601478041	735853595145417862	2065
1	3	0.092	0.092	-263030		0.018	6110	C26H22FN3O3	[M + H]+	C26H23FN3O3+	RKUKAWUJWLSCDC	InChI=1S/C26H22FN3O3/c1-17-11-12-19(13-22(17)27)29-24(31)16-30-23-10-6-5-9-20(23)21(14-25(30)32)26(33)28-15-18-7-3-2-4-8-18/h2-14H,15-16H2,1H3,(H,28,33)(H,29,31)	N-benzyl-1-{[(3-fluoro-4-methylphenyl)carbamoyl]methyl}-2-oxo-1,2-dihydroquinoline-4-carboxamide	CC1=C(C=C(C=C1)NC(=O)CN2C3=CC=CC=C3C(=CC2=O)C(=O)NCC4=CC=CC=C4)F	3400	25238700	COCONUT:(CNP0010344);SUPERNATURAL:(SN0328089);PUBCHEM:(25238700)	3145730	444171	408	6801	742795459530654024	735853573251149927	2064
1	1	0.206	0.206	-156314		0.987	47595	C17H15NO4	[M + H]+	C17H16NO4+	RACPTHYPAFVHHT	InChI=1S/C17H15NO4/c19-16(10-11-17(20)21)18-12-13-6-8-15(9-7-13)22-14-4-2-1-3-5-14/h1-11H,12H2,(H,18,19)(H,20,21)	(Z)-4-oxo-4-[(4-phenoxyphenyl)methylamino]but-2-enoic acid	C1=CC=C(C=C1)OC2=CC=C(C=C2)CNC(=O)C=CC(=O)O	2300	11289476	PUBCHEM:(11289476)	2	298107	409	6823	742887579246526944	735853470784298486	2082
1	1	0.2	0.2	-116249		1000	59941	C17H14O2	[M + H]+	C17H15O2+	KBVJPYCDOSNQRI	InChI=1S/C17H14O2/c18-17(19)16(15-11-5-2-6-12-15)13-7-10-14-8-3-1-4-9-14/h1-13H,(H,18,19)	alpha-Phenylcinnamylideneacetic acid	C1=CC=C(C=C1)C=CC=C(C2=CC=CC=C2)C(=O)O	4200	6108389;218067;12210737	PUBCHEMANNOTATIONSAFETYANDTOXIC:(null);PUBCHEM:(6108389 218067 12210737)	67108866	251107	411	6850	742875129352667114	735853431332673657	2108
1	1	0.162	0.162	-248077		0.984	22930	C18H14N2O3	[M + H]+	C18H15N2O3+	NBNIXHRNSOFCFA	InChI=1S/C18H14N2O3/c1-11(21)16(20-23)18(22)15-13-9-5-6-10-14(13)19-17(15)12-7-3-2-4-8-12/h2-10,19,22H,1H3	1,2,3-Butanetrione, 1-(2-phenyl-1H-indol-3-yl)-, 2-oxime	CC(=O)C(=C(C1=C(NC2=CC=CC=C21)C3=CC=CC=C3)O)N=O	3400	135537725	PUBCHEMANNOTATIONSAFETYANDTOXIC:(null);PUBCHEM:(135537725)	67108866	307108	415	6909	742823524843465313	735853480678662062	2174
1	1	0.091	0.091	-235539		0.796	24060	C24H21NO4	[M + H]+	C24H22NO4+	SKKYGLCUQGQTNA	InChI=1S/C24H21NO4/c26-23(27)13-16-9-11-17(12-10-16)14-25-24(28)29-15-22-20-7-3-1-5-18(20)19-6-2-4-8-21(19)22/h1-12,22H,13-15H2,(H,25,28)(H,26,27)	2-[4-[(9H-fluoren-9-ylmethoxycarbonylamino)methyl]phenyl]acetic Acid	C1=CC=C2C(=C1)C(C3=CC=CC=C32)COC(=O)NCC4=CC=C(C=C4)CC(=O)O	4000	2756152	PUBCHEMANNOTATIONSAFETYANDTOXIC:(null);PUBCHEM:(2756152)	67108866	388154	415	6918	739139369489744003	735853537805085153	2184
1	1	0.305	0.305	-108484		0.998	29450	C17H12N2O	[M + H]+	C17H13N2O+	OSFGHYZLBDAJTP	InChI=1S/C17H12N2O/c20-17-13(9-11-5-1-4-8-15(11)19-17)16-10-12-6-2-3-7-14(12)18-16/h1-10,18H,(H,19,20)		C1=CC=C2C(=C1)C=C(C(=O)N2)C3=CC4=CC=CC=C4N3	3100	5329371	PUBCHEMANNOTATIONBIO:(null);PUBCHEM:(5329371);PUBMED:(null)	16777282	261102	415	6918	742859353811949214	735853441881348452	2186
1	1	0.315	0.796	-114091		0.952	27220	C25H20N2O3	[M + H]+	C25H21N2O3+	FKUJAIJZDOOEDA	InChI=1S/C25H20N2O3/c1-16(26-21-14-8-6-12-19(21)17(2)28)23-24(29)20-13-7-9-15-22(20)27(25(23)30)18-10-4-3-5-11-18/h3-15,29H,1-2H3	3-[N-(2-acetylphenyl)-C-methylcarbonimidoyl]-4-hydroxy-1-phenylquinolin-2-one	CC(=O)C1=CC=CC=C1N=C(C)C2=C(C3=CC=CC=C3N(C2=O)C4=CC=CC=C4)O	3900	136010791	COCONUT:(CNP0445181);SUPERNATURAL:(SN0094625);PUBCHEM:(136010791)	3145730	397154	416	6936	742883424083761898	735853543886826243	2213
1	1	0.327	0.327	-235127		0.924	36928	C26H23N3O7	[M + H]+	C26H24N3O7+	NCANFMKAAKZYPK	InChI=1S/C26H23N3O7/c1-16(30)28-20-11-9-19(10-12-20)25(32)29-27-15-18-8-13-23(24(14-18)34-3)36-26(33)21-6-4-5-7-22(21)35-17(2)31/h4-15H,1-3H3,(H,28,30)(H,29,32)	Benzoic acid, 2-(acetyloxy)-, 4-(((4-(acetylamino)benzoyl)hydrazono)methyl)-2-methoxyphenyl ester	CC(=O)NC1=CC=C(C=C1)C(=O)NN=CC2=CC(=C(C=C2)OC(=O)C3=CC=CC=C3OC(=O)C)OC	3923	9587892;6446257	PUBCHEMANNOTATIONSAFETYANDTOXIC:(null);PUBCHEM:(9587892 6446257)	67108866	490161	417	6955	742833546348549533	735853595061531777	2237
1	2	0.088	0.088	-138114		0.033	37506	C17H15NO3	[M + H]+	C17H16NO3+	IKSDGPKPYIWECW	InChI=1S/C17H15NO3/c1-12(19)14-7-3-4-8-15(14)18-17(21)11-10-13-6-2-5-9-16(13)20/h2-11,19-20H,1H2,(H,18,21)	(E)-N-[2-(1-hydroxyethenyl)phenyl]-3-(2-hydroxyphenyl)prop-2-enamide	C=C(C1=CC=CC=C1NC(=O)C=CC2=CC=CC=C2O)O	3600	89311311	PUBCHEM:(89311311)	2	282112	417	6956	739265622166973819	735853458620816376	2201
1	2	0.143	0.143	-246960		0.462	50823	C26H21NO5	[M + H]+	C26H22NO5+	TVQVBYPEYJZANF	InChI=1S/C26H21NO5/c1-16(28)19-9-6-10-20(13-19)27-24(29)15-31-21-11-12-22-23(14-21)32-17(2)25(26(22)30)18-7-4-3-5-8-18/h3-14H,15H2,1-2H3,(H,27,29)	N-(3-acetylphenyl)-2-[(2-methyl-4-oxo-3-phenyl-4H-chromen-7-yl)oxy]acetamide	CC1=C(C(=O)C2=C(O1)C=C(C=C2)OCC(=O)NC3=CC=CC(=C3)C(=O)C)C4=CC=CC=C4	4100	16545451	COCONUT:(CNP0409123);SUPERNATURAL:(SN0361247);PUBCHEM:(16545451)	3145730	428149	418	6964	742868645168392737	735853565269389035	2249
1	1	0.924	0.957	-47696		1000	62557	C12H14N2O	[M + H]+	C12H15N2O+	NVUGEQAEQJTCIX	InChI=1S/C12H14N2O/c1-9(15)13-7-6-10-8-14-12-5-3-2-4-11(10)12/h2-5,8,14H,6-7H2,1H3,(H,13,15)	N-Acetyltryptamine	CC(=O)NCCC1=CNC2=CC=CC=C21	1669	101110933;153708111;10822076;70547;11694139	PUBCHEMANNOTATIONBIO:(null);COCONUT:(CNP0254513);HMDB:(HMDB0255077);BloodExposome:(70547);CHEBI:(55515);SUPERNATURAL:(SN0256604);MESH:(70547);PUBCHEM:(101110933 153708111 10822076 70547 11694139);DSSTox:(DTXSID30144042);LOTUS:(Q27124335);GNPS:(CCMSLIB00000851993 CCMSLIB00000079440);PUBCHEMANNOTATIONDRUG:(null);PUBMED:(null)	137765064814	203118	419	6989	738900146308329683	735853386722054818	2288
1	1	0.149	0.149	-245228		0.999	48875	C19H20N2O2	[M + H]+	C19H21N2O2+	OGBOHXYUBHDVMN	InChI=1S/C19H20N2O2/c22-16-8-5-14(6-9-16)11-12-20-19(23)10-7-15-13-21-18-4-2-1-3-17(15)18/h1-6,8-9,13,21-22H,7,10-12H2,(H,20,23)	N-[2-(4-hydroxyphenyl)ethyl]-3-(1H-indol-3-yl)propanamide	C1=CC=C2C(=C1)C(=CN2)CCC(=O)NCCC3=CC=C(C=C3)O	3455	7097194	COCONUT:(CNP0125522);SUPERNATURAL:(SN0264466);PUBCHEM:(7097194);PUBMED:(null)	3145794	309159	420	6992	739203107739378241	735853482314440702	2293
1	1	0.13	0.13	-341966		0.796	24177	C27H25N3O4	[M + H]+	C27H26N3O4+	YHJUHEGRDXQMJG	InChI=1S/C27H25N3O4/c1-33-24-13-7-21(8-14-24)19-34-25-15-16-26(31)30(29-25)23-11-9-22(10-12-23)27(32)28-18-17-20-5-3-2-4-6-20/h2-16H,17-19H2,1H3,(H,28,32)	4-[3-[(4-methoxybenzyl)oxy]-6-oxopyridazin-1(6H)-yl]-N-(2-phenylethyl)benzamide	COC1=CC=C(C=C1)COC2=NN(C(=O)C=C2)C3=CC=C(C=C3)C(=O)NCCC4=CC=CC=C4	4100	53062376	SUPERNATURAL:(SN0450455);PUBCHEM:(53062376)	1048578	456192	421	7019	739179763334202369	735853579735544246	2268
1	1	0.054	0.054	-341292		0.643	35175	C27H25N3O4	[M + H]+	C27H26N3O4+	YHJUHEGRDXQMJG	InChI=1S/C27H25N3O4/c1-33-24-13-7-21(8-14-24)19-34-25-15-16-26(31)30(29-25)23-11-9-22(10-12-23)27(32)28-18-17-20-5-3-2-4-6-20/h2-16H,17-19H2,1H3,(H,28,32)	4-[3-[(4-methoxybenzyl)oxy]-6-oxopyridazin-1(6H)-yl]-N-(2-phenylethyl)benzamide	COC1=CC=C(C=C1)COC2=NN(C(=O)C=C2)C3=CC=C(C=C3)C(=O)NCCC4=CC=CC=C4	4100	53062376	SUPERNATURAL:(SN0450455);PUBCHEM:(53062376)	1048578	456192	424	7063	738916240716805741	735853579651658161	2532
1	1	0.026	0.026	-209915		0.912	42219	C17H15NO3	[M + H]+	C17H16NO3+	UIELBEHBZKVMEI	InChI=1S/C17H15NO3/c1-21-16-9-4-14(5-10-16)12-18-15-7-2-13(3-8-15)6-11-17(19)20/h2-12H,1H3,(H,19,20)	4-[(4-Methoxybenzylidene)amino]cinnamic Acid	COC1=CC=C(C=C1)C=NC2=CC=C(C=C2)C=CC(=O)O	3100	6986566;5357579;255604;1473544	PUBCHEMANNOTATIONSAFETYANDTOXIC:(null);PUBCHEM:(6986566 5357579 255604 1473544);DSSTox:(DTXSID50292271);LOTUS:(Q115947416)	137774497794	282112	424	7066	739270040006416911	735853458499181555	2514
1	1	0.125	0.125	-225704		0.985	19398	C25H20N2O2	[M + H]+	C25H21N2O2+	IKWSJQIXRGFICA	InChI=1S/C25H20N2O2/c1-2-26-27-23-19-15-9-10-16-20(19)24(28)22(23)25(29)21(17-11-5-3-6-12-17)18-13-7-4-8-14-18/h2-16,21-22H,1H3	(2S,3Z)-2-(2,2-diphenylacetyl)-3-[(Z)-ethylidenehydrazinylidene]inden-1-one	CC=NN=C1C(C(=O)C2=CC=CC=C21)C(=O)C(C3=CC=CC=C3)C4=CC=CC=C4	4889	126455856;14345457;98052537;98052538;117064303;72730184	PUBCHEMANNOTATIONSAFETYANDTOXIC;PUBCHEM:(126455856 14345457 98052537 98052538 117064303 72730184);DSSTox:(DTXSID70559196)	137506062338	381160	426	7100	742831632630238680	735853534680328523	2646
1	1	0.05	0.05	-393919		0.99	27787	C26H21N3O6	[M + H]+	C26H22N3O6+	QFSJFHRPFACTFJ	InChI=1S/C26H21N3O6/c1-2-13-35-21-10-8-18(9-11-21)24(30)22-23(19-6-3-7-20(14-19)29(33)34)28(26(32)25(22)31)16-17-5-4-12-27-15-17/h2-12,14-15,23,30H,1,13,16H2	(4E,5S)-4-[hydroxy-(4-prop-2-enoxyphenyl)methylidene]-5-(3-nitrophenyl)-1-(pyridin-3-ylmethyl)pyrrolidine-2,3-dione	C=CCOC1=CC=C(C=C1)C(=C2C(N(C(=O)C2=O)CC3=CN=CC=C3)C4=CC(=CC=C4)[N+](=O)[O-])O	3800	4014648;5942079;5987012;5987013;40994354;40994356;98189486;98189487;3864038	PUBCHEMANNOTATIONSAFETYANDTOXIC;PUBCHEM:(4014648 5942079 5987012 5987013 40994354 40994356 98189486 98189487 3864038)	67108866	472150	429	7155	742872976127015227	735853586530317041	2717
1	1	0.095	0.095	-157289		0.947	41088	C16H13NO4	[M + H]+	C16H14NO4+	INBHLTYBRKASIZ	InChI=1S/C16H13NO4/c18-12-8-5-11(6-9-12)7-10-15(19)17-14-4-2-1-3-13(14)16(20)21/h1-10,18H,(H,17,19)(H,20,21)	Dianthramide P	C1=CC=C(C(=C1)C(=O)O)NC(=O)C=CC2=CC=C(C=C2)O	2465	15607909;154065280;6443019;149149920;185757	PUBCHEMANNOTATIONBIO;COCONUT:(CNP0107325);HMDB:(HMDB0029282 HMDB0038943);PUBCHEMANNOTATIONSAFETYANDTOXIC;CHEBI:(174706 174705);SUPERNATURAL:(SN0149983);FooDB:(FDB018419);PUBCHEM:(15607909 154065280 6443019 149149920 185757);DSSTox:(DTXSID001179579 DTXSID401316674);LOTUS:(Q105116066 Q76386900);PUBCHEMANNOTATIONDRUG;PUBMED	138364846186	284092	429	7156	741008269054412992	735853460562779208	2719
1	1	0.056	0.056	-276931		0.923	40278	C24H22N2O3	[M + H]+	C24H23N2O3+	ZESOONLCWUDMKP	InChI=1S/C24H22N2O3/c1-29-20-13-11-17(12-14-20)16-25-23(27)22-15-19-9-5-6-10-21(19)26(22)24(28)18-7-3-2-4-8-18/h2-14,22H,15-16H2,1H3,(H,25,27)	1-benzoyl-N-(4-methoxybenzyl)indoline-2-carboxamide	COC1=CC=C(C=C1)CNC(=O)C2CC3=CC=CC=C3N2C(=O)C4=CC=CC=C4	3800	20954608;92494998;92494999	SUPERNATURAL:(SN0468418);PUBCHEM:(20954608 92494998 92494999)	1048578	387170	429	7156	738898401565944813	735853537205299651	2724
1	1	0.188	0.188	-90614		0.998	43132	C17H11NO	[M + H]+	C17H12NO+	TVEKJGASCILVPS	InChI=1S/C17H11NO/c19-18-16(12-10-14-6-2-1-3-7-14)13-11-15-8-4-5-9-17(15)18/h1-9,11,13H	1-Oxido-2-(2-phenylethynyl)quinolin-1-ium	C1=CC=C(C=C1)C#CC2=[N+](C3=CC=CC=C3C=C2)[O-]	3300	154375847	PUBCHEM:(154375847)	2	246091	430	7161	742883811595509017	735853425666168758	2721
1	2	0.044	0.044	-368606		0.262	23954	C24H27N3O4	[M + H]+	C24H28N3O4+	YYJNOYZRYGDPNH	InChI=1S/C24H27N3O4/c1-17-21(22(27(5)26-17)30-20-9-7-6-8-10-20)15-25-29-16-18-11-13-19(14-12-18)23(28)31-24(2,3)4/h6-15H,16H2,1-5H3	tert-butyl 4-[({[(1,3-dimethyl-5-phenoxy-1H-pyrazol-4-yl)methylidene]amino}oxy)methyl]benzoate	CC1=NN(C(=C1C=NOCC2=CC=C(C=C2)C(=O)OC(C)(C)C)OC3=CC=CC=C3)C	4900	9576412;6002001;107760	PUBCHEMANNOTATIONBIO;HMDB:(HMDB0252220);PUBCHEMANNOTATIONSAFETYANDTOXIC;BloodExposome:(9576412);SUPERNATURAL:(SN0463599);HSDB:(134098-61-6);MESH:(9576412);PUBCHEM:(9576412 6002001 107760);GNPS:(CCMSLIB00001059011 CCMSLIB00001058629);COCONUT:(CNP0347383);NORMAN:(NS00002695);CHEBI:(5011);KEGG:(C11098);DSSTox:(DTXSID2032550 DTXSID701106000 DTXSID7032557);PUBCHEMANNOTATIONDRUG;PUBMED	137564001134	422207	430	7166	742866723367659476	735853562652143219	2739
1	1	0.241	0.241	-230240		0.994	43330	C19H20N2O2	[M + H]+	C19H21N2O2+	UWXBXUJBRJFVHL	InChI=1S/C19H20N2O2/c1-22-12-7-8-16-15(11-12)13-9-10-20-18(19(13)21-16)14-5-3-4-6-17(14)23-2/h3-8,11,18,20-21H,9-10H2,1-2H3	6-methoxy-1-(2-methoxyphenyl)-1H,2H,3H,4H,9H-pyrido[3,4-b]indole	COC1=CC2=C(C=C1)NC3=C2CCNC3C4=CC=CC=C4OC	3100	6955617;6955618;3253742;933590;933593	COCONUT:(CNP0333741);SUPERNATURAL:(SN0382281);PUBCHEM:(6955617 6955618 3253742 933590 933593)	3145730	309159	433	7219	739135037830676017	735853482431881219	3229
1	1	0.229	0.289	-149252		0.918	40744	C21H19N3O2	[M + H]+	C21H20N3O2+	SZXRKZPILUBBLC	InChI=1S/C21H19N3O2/c1-23-14-18(16-7-3-4-8-17(16)21(23)26)20(25)22-11-13-24-12-10-15-6-2-5-9-19(15)24/h2-10,12,14H,11,13H2,1H3,(H,22,25)	N-[2-(1H-indol-1-yl)ethyl]-2-methyl-1-oxo-1,2-dihydroisoquinoline-4-carboxamide	CN1C=C(C2=CC=CC=C2C1=O)C(=O)NCCN3C=CC4=CC=CC=C43	2200	56698858	COCONUT:(CNP0346036);SUPERNATURAL:(SN0359816);PUBCHEM:(56698858)	3145730	346155	433	7220	742881726523101422	735853508616922312	2860
1	1	0.196	0.196	-131008		0.82	20157	C15H11NO2	[M + H]+	C15H12NO2+	SVTDYSXXLJYUTM	InChI=1S/C15H11NO2/c1-16-12-8-4-7-11-13(12)15(18)10-6-3-2-5-9(10)14(11)17/h2-8,16H,1H3	1-(Methylamino)anthraquinone	CNC1=CC=CC2=C1C(=O)C3=CC=CC=C3C2=O	2673	6706	NORMAN:(NS00020709);PUBCHEMANNOTATIONSAFETYANDTOXIC;MESH:(6706);PUBCHEM:(6706);DSSTox:(DTXSID2052570);PUBMED	137506324550	238086	436	7259	742824664804962190	735853420230350559	3000
1	4	0.044	0.092	-402530		0.037	3740	C27H31N3O4	[M + K]+	C27H31KN3O4+	FBMOSAYORHNBBG	InChI=1S/C27H31N3O4/c1-18(2)30-25(32)22-11-7-6-10-21(22)23(26(33)28-12-14-34-15-13-28)27(30)16-29(17-27)24(31)20-9-5-4-8-19(20)3/h4-11,18,23H,12-17H2,1-3H3	1'-(2-methylbenzoyl)-4-(morpholine-4-carbonyl)-2-propan-2-ylspiro[4H-isoquinoline-3,3'-azetidine]-1-one	CC1=CC=CC=C1C(=O)N2CC3(C2)C(C4=CC=CC=C4C(=O)N3C(C)C)C(=O)N5CCOCC5	2200	137919558	SUPERNATURAL:(SN0081211);PUBCHEM:(137919558)	1048578	500195	436	7262	742797273583912056	735853598278563125	2990
1	1	0.994	0.997	-24097		1000	32814	C12H14N2O	[M + H]+	C12H15N2O+	NVUGEQAEQJTCIX	InChI=1S/C12H14N2O/c1-9(15)13-7-6-10-8-14-12-5-3-2-4-11(10)12/h2-5,8,14H,6-7H2,1H3,(H,13,15)	N-Acetyltryptamine	CC(=O)NCCC1=CNC2=CC=CC=C21	1669	101110933;153708111;10822076;70547;11694139	PUBCHEMANNOTATIONBIO:(null);COCONUT:(CNP0254513);HMDB:(HMDB0255077);BloodExposome:(70547);CHEBI:(55515);SUPERNATURAL:(SN0256604);MESH:(70547);PUBCHEM:(101110933 153708111 10822076 70547 11694139);DSSTox:(DTXSID30144042);LOTUS:(Q27124335);GNPS:(CCMSLIB00000851993 CCMSLIB00000079440);PUBCHEMANNOTATIONDRUG:(null);PUBMED:(null)	137765064814	203118	437	7284	742767594298728446	735853386420064925	3226
1	6	0.008	0.008	-224056		0.034	4400	C21H18N2O2	[M + H]+	C21H19N2O2+	NWHQDZJUELCUHQ	InChI=1S/C21H18N2O2/c1-14(24)15-7-9-16(10-8-15)18-11-12-19(22)20(13-18)23-21(25)17-5-3-2-4-6-17/h2-13H,22H2,1H3,(H,23,25)	N-(4''-acetyl-4-aminobiphenyl-3-yl)benzamide	CC(=O)C1=CC=C(C=C1)C2=CC(=C(C=C2)N)NC(=O)C3=CC=CC=C3	3400	46887380	PUBCHEMANNOTATIONBIO;PUBCHEM:(46887380);PUBMED	16777282	331141	437	7286	742775357087215437	735853497304883898	3214
1	1	0.044	0.044	-213013		0.949	49666	C17H15NO3	[M + H]+	C17H16NO3+	UBISAYNIWCWOIB	InChI=1S/C17H15NO3/c19-16(18-15-9-5-2-6-10-15)13-21-17(20)12-11-14-7-3-1-4-8-14/h1-12H,13H2,(H,18,19)	(phenylcarbamoyl)methyl 3-phenylprop-2-enoate	C1=CC=C(C=C1)C=CC(=O)OCC(=O)NC2=CC=CC=C2	3233	717379;717380	COCONUT:(CNP0009993);SUPERNATURAL:(SN0365800);PUBCHEM:(717379 717380)	3145730	282112	438	7297	738891916018512971	735853458276883433	3408
1	1	0.186	0.186	-147097		0.852	25424	C16H13FN2O4	[M + H]+	C16H14FN2O4+	YTTXTTYETQYNFV	InChI=1S/C16H13FN2O4/c17-12-7-3-1-5-10(12)16(22)23-9-14(20)19-13-8-4-2-6-11(13)15(18)21/h1-8H,9H2,(H2,18,21)(H,19,20)	[2-(2-Carbamoylanilino)-2-oxoethyl] 2-fluorobenzoate	C1=CC=C(C(=C1)C(=O)N)NC(=O)COC(=O)C2=CC=CC=C2F	2200	7873273	PUBCHEM:(7873273)	2	317092	440	7333	742774486043518470	735853489721581876	3459
1	1	0.072	0.072	-232574		1000	40312	C28H22N2O4	[M + H]+	C28H23N2O4+	HNEUPRSHTRZVBQ	InChI=1S/C28H22N2O4/c31-27(20-33-25-17-13-23(14-18-25)22-7-3-1-4-8-22)30-29-19-21-11-15-26(16-12-21)34-28(32)24-9-5-2-6-10-24/h1-19H,20H2,(H,30,31)	[4-[[[2-(4-Phenylphenoxy)acetyl]hydrazinylidene]methyl]phenyl] benzoate	C1=CC=C(C=C1)C2=CC=C(C=C2)OCC(=O)NN=CC3=CC=C(C=C3)OC(=O)C4=CC=CC=C4	5900	9629551;5885564;3649666	PUBCHEMANNOTATIONSAFETYANDTOXIC;PUBCHEM:(9629551 5885564 3649666)	67108866	451165	441	7350	742870417639321011	735853576363323660	3492
1	1	0.104	0.104	-280318		0.935	25964	C26H26N2O3	[M + Na]+	C26H26N2NaO3+	RVSVDPQBPGNVQS	InChI=1S/C26H26N2O3/c1-20(17-22-9-5-3-6-10-22)18-27-28-26(29)21(2)31-25-15-13-24(14-16-25)30-19-23-11-7-4-8-12-23/h3-18,21H,19H2,1-2H3,(H,28,29)	(2S)-N-[(Z)-[(Z)-2-methyl-3-phenylprop-2-enylidene]amino]-2-(4-phenylmethoxyphenoxy)propanamide	CC(C(=O)NN=CC(=CC1=CC=CC=C1)C)OC2=CC=C(C=C2)OCC3=CC=CC=C3	5500	51060567;75609932;93953425;93953426	PUBCHEMANNOTATIONSAFETYANDTOXIC:(null);PUBCHEM:(51060567 75609932 93953425 93953426)	67108866	437184	444	7401	735855361937268964	735853568922628009	3560
1	1	0.317	0.317	-249349		0.954	40585	C23H23N3O3	[M + H]+	C23H24N3O3+	FKLAXTMGRBKEBZ	InChI=1S/C23H23N3O3/c1-14-22-18(17-5-3-4-6-19(17)24-22)11-20-23(28)25(13-21(27)26(14)20)12-15-7-9-16(29-2)10-8-15/h3-10,14,20,24H,11-13H2,1-2H3	6-[(4-methoxyphenyl)methyl]-2-methyl-3,6,17-triazatetracyclo[8.7.0.0¬≥,‚Å∏.0¬π¬π,¬π‚Å∂]heptadeca-1(10),11,13,15-tetraene-4,7-dione	CC1C2=C(CC3N1C(=O)CN(C3=O)CC4=CC=C(C=C4)OC)C5=CC=CC=C5N2	2600	16399435;1804066;1804067;3839245	COCONUT:(CNP0188032);SUPERNATURAL:(SN0088128);PUBCHEM:(16399435 1804066 1804067 3839245)	3145730	390181	445	7421	739190166080538147	735853539109513757	3585
1	1	0.247	0.406	-232813		0.998	39236	C30H29N3O4	[M + H]+	C30H30N3O4+	DKITYROPXBTOHL	InChI=1S/C30H29N3O4/c1-3-37-26-15-9-6-12-21(26)29-28-22(20-11-5-7-13-23(20)31-28)16-24-30(35)32(18-27(34)33(24)29)17-19-10-4-8-14-25(19)36-2/h4-15,24,29,31H,3,16-18H2,1-2H3	2-(2-ethoxyphenyl)-6-[(2-methoxyphenyl)methyl]-3,6,17-triazatetracyclo[8.7.0.0¬≥,‚Å∏.0¬π¬π,¬π‚Å∂]heptadeca-1(10),11,13,15-tetraene-4,7-dione	CCOC1=CC=CC=C1C2C3=C(CC4N2C(=O)CN(C4=O)CC5=CC=CC=C5OC)C6=CC=CC=C6N3	4300	16400615;3475299;1765940;1765941	COCONUT:(CNP0300094);SUPERNATURAL:(SN0068104);PUBCHEM:(16400615 3475299 1765940 1765941)	3145730	496223	445	7423	739200903414521387	735853595929752755	3583
1	1	0.302	0.302	-195778		0.984	74963	C19H13NO4	[M + H]+	C19H14NO4+	VQIQJMRYDHHZJV	InChI=1S/C19H13NO4/c21-15(22)10-13-16-18(24-17(13)11-6-2-1-3-7-11)12-8-4-5-9-14(12)20-19(16)23/h1-9H,10H2,(H,20,23)(H,21,22)	(4-Hydroxy-2-phenylfuro[3,2-c]quinolin-3-yl)acetic acid	C1=CC=C(C=C1)C2=C(C3=C(O2)C4=CC=CC=C4NC3=O)CC(=O)O	2700	145704905	SUPERNATURAL:(SN0397253);PUBCHEM:(145704905)	1048578	320092	446	7427	742774906165980616	735853491814539677	3607
1	1	0.087	0.087	-305884		0.906	16950	C26H26N2O3	[M + H]+	C26H27N2O3+	YOQCDJKPFWASHZ	InChI=1S/C26H26N2O3/c1-31-24-15-9-8-14-21(24)22-17-28(26(30)20-12-6-3-7-13-20)18-23(22)25(29)27-16-19-10-4-2-5-11-19/h2-15,22-23H,16-18H2,1H3,(H,27,29)	(3R,4R)-1-benzoyl-N-benzyl-4-(2-methoxyphenyl)pyrrolidine-3-carboxamide	COC1=CC=CC=C1C2CN(CC2C(=O)NCC3=CC=CC=C3)C(=O)C4=CC=CC=C4	3700	42681006;93151792;93151793;93151794;93151795	SUPERNATURAL:(SN0456124);PUBCHEM:(42681006 93151792 93151793 93151794 93151795)	1048578	415201	446	7428	742794400246595246	735853556520070461	3595
1	1	0.064	0.064	-396759		0.978	8428	C30H29N3O4	[M + Na]+	C30H29N3NaO4+	DKITYROPXBTOHL	InChI=1S/C30H29N3O4/c1-3-37-26-15-9-6-12-21(26)29-28-22(20-11-5-7-13-23(20)31-28)16-24-30(35)32(18-27(34)33(24)29)17-19-10-4-8-14-25(19)36-2/h4-15,24,29,31H,3,16-18H2,1-2H3	2-(2-ethoxyphenyl)-6-[(2-methoxyphenyl)methyl]-3,6,17-triazatetracyclo[8.7.0.0¬≥,‚Å∏.0¬π¬π,¬π‚Å∂]heptadeca-1(10),11,13,15-tetraene-4,7-dione	CCOC1=CC=CC=C1C2C3=C(CC4N2C(=O)CN(C4=O)CC5=CC=CC=C5OC)C6=CC=CC=C6N3	4300	16400615;3475299;1765940;1765941	COCONUT:(CNP0300094);SUPERNATURAL:(SN0068104);PUBCHEM:(16400615 3475299 1765940 1765941)	3145730	518205	446	7431	741013042377886283	735853603341088308	3601
1	5	0.063	0.063	-144061		0.006	36056	C21H22ClN5O2	[M + H]+	C21H23ClN5O2+	BJOCOOANWGDCGC	InChI=1S/C21H22ClN5O2/c1-12-8-9-13(2)18(10-12)24-21(29)20-15(4)27(26-25-20)11-19(28)23-17-7-5-6-16(22)14(17)3/h5-10H,11H2,1-4H3,(H,23,28)(H,24,29)	1-{2-[(3-chloro-2-methylphenyl)amino]-2-oxoethyl}-N-(2,5-dimethylphenyl)-5-methyl-1H-1,2,3-triazole-4-carboxamide	CC1=CC(=C(C=C1)C)NC(=O)C2=C(N(N=N2)CC(=O)NC3=C(C(=CC=C3)Cl)C)C	4000	53365842	PUBCHEM:(53365842)	2	412154	447	7442	742887085929263342	735853554506804441	3633
1	2	0.098	0.098	-394341		0.014	72149	C28H26N2O5	[M + H]+	C28H27N2O5+	ULVDFHLHKNJICZ	InChI=1S/C28H26N2O5/c1-20-26(29-28(35-20)23-10-6-3-7-11-23)19-33-24-14-12-21(13-15-24)18-34-30-25(16-17-27(31)32)22-8-4-2-5-9-22/h2-15H,16-19H2,1H3,(H,31,32)	4-[[4-[(5-Methyl-2-phenyl-1,3-oxazol-4-yl)methoxy]phenyl]methoxyimino]-4-phenylbutanoic acid	CC1=C(N=C(O1)C2=CC=CC=C2)COC3=CC=C(C=C3)CON=C(CCC(=O)O)C4=CC=CC=C4	5100	86310108;9890879;9956352;54359967;149436256	PUBCHEMANNOTATIONBIO;NORMAN:(NS00072611);HMDB:(HMDB0253429);BloodExposome:(9890879 54359967);MESH:(9890879);PUBCHEM:(86310108 9890879 9956352 54359967 149436256);DSSTox:(DTXSID00870280);PUBCHEMANNOTATIONDRUG;PUBMED	137493741646	471191	449	7481	742871849784424124	735853586249298658	3744
1	1	0.525	0.525	-316304		0.919	28245	C30H31N3O4	[M + H]+	C30H32N3O4+	YQQOGGKMMZWNAV	InChI=1S/C30H31N3O4/c1-33(28-13-7-8-18-31-28)19-20-37-24-16-14-22(15-17-24)21-27(30(35)36)32-26-12-6-5-11-25(26)29(34)23-9-3-2-4-10-23/h2-18,27,29,32,34H,19-21H2,1H3,(H,35,36)	(2S)-2-[2-[hydroxy(phenyl)methyl]anilino]-3-[4-[2-[methyl(pyridin-2-yl)amino]ethoxy]phenyl]propanoic acid	CN(CCOC1=CC=C(C=C1)CC(C(=O)O)NC2=CC=CC=C2C(C3=CC=CC=C3)O)C4=CC=CC=N4	5900	155803640;10553354;44364423	PUBCHEMANNOTATIONBIO;PUBCHEM:(155803640 10553354 44364423);PUBMED	16777282	498238	450	7497	738899100487987109	735853597284513022	3812
1	3	0.162	0.162	-416573		0.013	28456	C29H35N3O4	[M + Na]+	C29H35N3NaO4+	RMECGAJLQSXPKZ	InChI=1S/C29H35N3O4/c1-3-5-16-35-17-10-15-31-19-26(33)32-24(29(31)34)18-22-20-11-6-8-13-23(20)30-27(22)28(32)21-12-7-9-14-25(21)36-4-2/h6-9,11-14,24,28,30H,3-5,10,15-19H2,1-2H3	6-(3-butoxypropyl)-2-(2-ethoxyphenyl)-3,6,17-triazatetracyclo[8.7.0.0¬≥,‚Å∏.0¬π¬π,¬π‚Å∂]heptadeca-1(10),11,13,15-tetraene-4,7-dione	CCCCOCCCN1CC(=O)N2C(C1=O)CC3=C(C2C4=CC=CC=C4OCC)NC5=CC=CC=C35	4300	16400447;40872525;1765017;3748222	COCONUT:(CNP0381163);SUPERNATURAL:(SN0329202);PUBCHEM:(16400447 40872525 1765017 3748222)	3145730	512254	462	7694	735858891406336895	735853601818555876	3928
1	1	0.029	0.029	-224391		0.995	38119	C17H15NO3	[M + H]+	C17H16NO3+	LWQLUARVXRKPCD	InChI=1S/C17H15NO3/c1-2-11-21-14-9-7-13(8-10-14)12-18-16-6-4-3-5-15(16)17(19)20/h2-10,12H,1,11H2,(H,19,20)	2-(((4-(2-Propenyloxy)phenyl)methylene)amino)benzoic acid	C=CCOC1=CC=C(C=C1)C=NC2=CC=CC=C2C(=O)O	3400	3055050	PUBCHEMANNOTATIONSAFETYANDTOXIC:(null);PUBCHEM:(3055050)	67108866	282112	462	7708	742880856116940127	735853458364963822	3937
1	1	0.067	0.067	-233624		0.577	41585	C24H21NO4	[M + H]+	C24H22NO4+	SKKYGLCUQGQTNA	InChI=1S/C24H21NO4/c26-23(27)13-16-9-11-17(12-10-16)14-25-24(28)29-15-22-20-7-3-1-5-18(20)19-6-2-4-8-21(19)22/h1-12,22H,13-15H2,(H,25,28)(H,26,27)	2-[4-[(9H-fluoren-9-ylmethoxycarbonylamino)methyl]phenyl]acetic Acid	C1=CC=C2C(=C1)C(C3=CC=CC=C32)COC(=O)NCC4=CC=C(C=C4)CC(=O)O	4000	2756152	PUBCHEMANNOTATIONSAFETYANDTOXIC:(null);PUBCHEM:(2756152)	67108866	388154	463	7714	739194168520297208	735853537712810460	3944
1	1	0.153	0.153	-223012		1000	72274	C16H15NO4	[M + H]+	C16H16NO4+	AQDGEUMMMQRBPR	InChI=1S/C16H15NO4/c1-9-6-7-11(15(18)19)13(8-9)17-14-10(2)4-3-5-12(14)16(20)21/h3-8,17H,1-2H3,(H,18,19)(H,20,21)	2-[(2-Carboxy-5-Methylphenyl)amino]-3-Methylbenzoic Acid	CC1=CC(=C(C=C1)C(=O)O)NC2=C(C=CC=C2C(=O)O)C	3800	10779478	PUBCHEMANNOTATIONBIO;PUBCHEM:(10779478);PUBMED	16777282	286107	463	7721	741744242638306192	735853462131448974	3948
1	1	0.574	0.574	-107100		0.999	51210	C17H14N2O	[M + H]+	C17H15N2O+	FRPPXMUHVKTGIM	InChI=1S/C17H14N2O/c20-17(13-9-18-15-7-3-1-5-11(13)15)14-10-19-16-8-4-2-6-12(14)16/h1-10,17-20H	bis(1H-indol-3-yl)methanol	C1=CC=C2C(=C1)C(=CN2)C(C3=CNC4=CC=CC=C43)O	3000	24721133	PUBCHEM:(24721133)	2	263118	465	7752	738544490772814851	735853444704115149	3977
1	1	0.342	0.342	-108393		1000	25523	C16H13NO	[M + H]+	C16H14NO+	WRXGEZLZGNKKGJ	InChI=1S/C16H13NO/c1-11-15(12-7-3-2-4-8-12)13-9-5-6-10-14(13)17-16(11)18/h2-10H,1H3,(H,17,18)	3-Methyl-4-phenyl-2(1H)-quinolinone	CC1=C(C2=CC=CC=C2NC1=O)C3=CC=CC=C3	2900	616488	PUBCHEMANNOTATIONSAFETYANDTOXIC;PUBCHEM:(616488);DSSTox:(DTXSID20346932)	137506062338	236107	468	7799	742772818132394576	735853419362129591	4020
1	1	0.081	0.081	-388281		0.998	57086	C16H24N4O4S	[M + H]+	C16H25N4O4S+	IUARBNWZZKSDTF	InChI=1S/C16H24N4O4S/c1-12(2)9-20-14-10-19(11-15(14)24-6-7-25(20,22)23)16(21)18-13-4-3-5-17-8-13/h3-5,8,12,14-15H,6-7,9-11H2,1-2H3,(H,18,21)	(5aS,8aR)-1-(2-methylpropyl)-2,2-dioxo-N-pyridin-3-yl-3,4,5a,6,8,8a-hexahydropyrrolo[3,4-f][1,4,5]oxathiazepine-7-carboxamide	CC(C)CN1C2CN(CC2OCCS1(=O)=O)C(=O)NC3=CN=CC=C3	0.2	137954098	SUPERNATURAL:(SN0155312);PUBCHEM:(137954098)	1048578	369160	468	7803	741698032986058747	735853524567861164	4018
1	3	0.036	0.036	-268498		0	55542	C21H24N2O3	[M + K]+	C21H24KN2O3+	SSSCMFCWHWCCEH	InChI=1S/C21H24N2O3/c1-4-20-11-22(2)17-12-10-26-16(9-14(12)20)21(18(17)20)13-7-5-6-8-15(13)23(25-3)19(21)24/h4-8,12,14,16-18H,1,9-11H2,2-3H3	Gelsevirine	CN1CC2(C3CC4C5(C2C1C3CO4)C6=CC=CC=C6N(C5=O)OC)C=C	2000	154790188;154831635;163187362;5491636;160926501;14217344;102004482;102118041;137345981;162941590;125114838;125181798;125181799;146158801;572828;129316757	COCONUT:(CNP0211944);NORMAN:(NS00094518);CHEBI:(182653);SUPERNATURAL:(SN0354284);PUBCHEM:(154790188 154831635 163187362 5491636 160926501 14217344 102004482 102118041 137345981 162941590 125114838 125181798 125181799 146158801 572828 129316757);DSSTox:(DTXSID70959834);LOTUS:(Q105259866 Q105259869 Q105259868 Q104397281);PUBMED;KNAPSACK:(SSSCMFCWHWCCEH-UHFFFAOYSA-N)	137710796914	391142	469	7812	742777102836233669	735853539411503660	4019
1	1	0.146	0.146	-305701		0.948	11434	C26H26N2O3	[M + Na]+	C26H26N2NaO3+	MZQHGCPWYMAKLI	InChI=1S/C26H26N2O3/c1-3-31-24-17-11-10-16-22(24)18-23(28-25(29)21-14-8-5-9-15-21)26(30)27-19(2)20-12-6-4-7-13-20/h4-19H,3H2,1-2H3,(H,27,30)(H,28,29)	N-[(Z)-1-(2-ethoxyphenyl)-3-oxo-3-[[(1S)-1-phenylethyl]amino]prop-1-en-2-yl]benzamide	CCOC1=CC=CC=C1C=C(C(=O)NC(C)C2=CC=CC=C2)NC(=O)C3=CC=CC=C3	4900	5719587;1858233;1858236;1858241;1858244;2836668	SUPERNATURAL:(SN0239622);PUBCHEM:(5719587 1858233 1858236 1858241 1858244 2836668);PUBMED:(null)	1048642	437183	469	7822	738897544166320546	735853568838741924	4045
1	1	0.436	0.436	-133558		0.92	49629	C19H20N2O2	[M + H]+	C19H21N2O2+	JWWMHFMWLLCWPR	InChI=1S/C19H20N2O2/c22-18-8-4-1-5-14(18)9-10-19(23)20-12-11-15-13-21-17-7-3-2-6-16(15)17/h1-8,13,21-22H,9-12H2,(H,20,23)	3-(2-hydroxyphenyl)-N-[2-(1H-indol-3-yl)ethyl]propanamide	C1=CC=C(C(=C1)CCC(=O)NCCC2=CNC3=CC=CC=C32)O	3455	27645498	PUBCHEM:(27645498)	2	309159	469	7823	738895109909707356	735853482620624909	4048
1	2	0.051	0.051	-285075		0.015	48550	C22H27N5O2	[M + Na]+	C22H27N5NaO2+	FFAQILVGBAELHN	InChI=1S/C22H27N5O2/c1-3-17(2)27-22(29)26(16-23-27)20-6-4-18(5-7-20)24-12-14-25(15-13-24)19-8-10-21(28)11-9-19/h4-11,16-17,28H,3,12-15H2,1-2H3	2-sec-Butyl-d5-4-{4-[4-(4-hydroxy-phenyl)-piperazin-1-yl]-phenyl}-2,4-dihydro-[1,2,4]-triazol-3-one	CCC(C)N1C(=O)N(C=N1)C2=CC=C(C=C2)N3CCN(CC3)C4=CC=C(C=C4)O	3800	4445081;92043828;991889;991890;45038526	NORMAN:(NS00077759);PUBCHEMANNOTATIONSAFETYANDTOXIC;PUBCHEM:(4445081 92043828 991889 991890 45038526);DSSTox:(DTXSID101109987 DTXSID60403376 DTXSID90661846);PUBMED	137506324546	416205	469	7824	739200065312890024	735853557119855963	4038
1	1	0.052	0.052	-302518		0.961	53004	C26H26N2O3	[M + H]+	C26H27N2O3+	MZQHGCPWYMAKLI	InChI=1S/C26H26N2O3/c1-3-31-24-17-11-10-16-22(24)18-23(28-25(29)21-14-8-5-9-15-21)26(30)27-19(2)20-12-6-4-7-13-20/h4-19H,3H2,1-2H3,(H,27,30)(H,28,29)	N-[(Z)-1-(2-ethoxyphenyl)-3-oxo-3-[[(1S)-1-phenylethyl]amino]prop-1-en-2-yl]benzamide	CCOC1=CC=CC=C1C=C(C(=O)NC(C)C2=CC=CC=C2)NC(=O)C3=CC=CC=C3	4900	5719587;1858233;1858236;1858241;1858244;2836668	SUPERNATURAL:(SN0239622);PUBCHEM:(5719587 1858233 1858236 1858241 1858244 2836668);PUBMED:(null)	1048642	415201	470	7825	738910678746739234	735853556624928066	4049
1	1	0.047	0.047	-466753		0.874	38059	C31H33N3O4	[M + H]+	C31H34N3O4+	MVEOVXOGZPWVHN	InChI=1S/C31H33N3O4/c35-30-24(20-33-10-14-37-15-11-33)18-23(19-25(30)21-34-12-16-38-17-13-34)31(36)28-26-8-4-5-9-27(26)32-29(28)22-6-2-1-3-7-22/h1-9,18-19,32,35H,10-17,20-21H2	Methanone, (4-hydroxy-3,5-bis(4-morpholinylmethyl)phenyl)(2-phenyl-1H-indol-3-yl)-	C1COCCN1CC2=CC(=CC(=C2O)CN3CCOCC3)C(=O)C4=C(NC5=CC=CC=C54)C6=CC=CC=C6	3600	1201629	MESH:(1201629);PUBCHEM:(1201629);PUBMED:(null)	70	512254	470	7839	739192901878237466	735853601906636265	4071
1	2	0.034	0.034	-166917		0.246	34239	C16H14O6	[M + H]+	C16H15O6+	WZUVPPKBWHMQCE	InChI=1S/C16H14O6/c17-10-2-1-8-13-9-4-12(19)11(18)3-7(9)5-16(13,21)6-22-15(8)14(10)20/h1-4,13,17-21H,5-6H2	Hematoxylin	C1C2=CC(=C(C=C2C3C1(COC4=C3C=CC(=C4O)O)O)O)O	1200	15559608;736141;736142;45029742;10603;320930;442514;138106960	PUBCHEMANNOTATIONBIO;HMDB:(HMDB0242211);PUBCHEMANNOTATIONSAFETYANDTOXIC;BloodExposome:(10603 45029742 442514 15559608 320930);LIPIDMAPS:(LMPK12100063);SUPERNATURAL:(SN0424446);HSDB:(517-28-2);MESH:(10603 320930 442514 45029742);PUBCHEM:(15559608 736141 736142 45029742 10603 320930 442514 138106960);GNPS:(CCMSLIB00000845157);COCONUT:(CNP0232132);NORMAN:(NS00015351);CHEBI:(51686 5601 51684);KEGG:(C…	140114137982	303084	471	7848	742885553775175779	735853475515473613	4077
1	1	0.198	0.198	-154039		0.956	36557	C16H13NO3	[M + H]+	C16H14NO3+	BIOYMYKQUHGHGY	InChI=1S/C16H13NO3/c18-14(11-6-2-1-3-7-11)10-16(20)12-8-4-5-9-13(12)17-15(16)19/h1-9,20H,10H2,(H,17,19)	3-hydroxy-3-(2-oxo-2-phenylethyl)-2,3-dihydro-1H-indol-2-one	C1=CC=C(C=C1)C(=O)CC2(C3=CC=CC=C3NC2=O)O	1900	7056957;682355;99051	COCONUT:(CNP0069425);MESH:(99051);PUBCHEM:(7056957 682355 99051);DSSTox:(DTXSID90967754);PUBMED	137441050694	268097	471	7850	738918420249131941	735853449192020554	4083
1	2	0.143	0.143	-175173		0.315	35446	C18H11NO3	[M + H]+	C18H12NO3+	QURSZUGJDNPKAN	InChI=1S/C18H11NO3/c20-14-8-11-9-19-18(22)13-7-6-12(10-4-2-1-3-5-10)16(15(11)13)17(14)21/h1-9,20-21H	5,6-Dihydroxy-7-phenylbenzo[de]isoquinolin-1-one	C1=CC=C(C=C1)C2=C3C4=C(C=C2)C(=O)N=CC4=CC(=C3O)O	3100	163076993	COCONUT:(CNP0378776);SUPERNATURAL:(SN0422916);PUBCHEM:(163076993)	3145730	290079	479	7977	742884324038795599	735853464182463730	4207
1	3	0.623	0.623	-141784		0.003	47177	C20H13NO3	[M + H]+	C20H14NO3+	KGKLIFKFUPGIEE	InChI=1S/C20H13NO3/c22-19(21-14-7-2-1-3-8-14)17-12-16-15-9-5-4-6-13(15)10-11-18(16)24-20(17)23/h1-12H,(H,21,22)	3-oxo-N-phenyl-3H-benzo[f]chromene-2-carboxamide	C1=CC=C(C=C1)NC(=O)C2=CC3=C(C=CC4=CC=CC=C43)OC2=O	4200	3123858	PUBCHEMANNOTATIONBIO;PUBCHEM:(3123858);PUBMED	16777282	316097	481	8024	742823816741858366	735853489423786277	4238
1	1	0.076	0.076	-195955		0.839	37402	C22H19NO2	[M + H]+	C22H20NO2+	GRYUYEGTBDBASR	InChI=1S/C22H19NO2/c1-25-20-14-12-19(13-15-20)23-16-21(17-8-4-2-5-9-17)22(24)18-10-6-3-7-11-18/h2-16,23H,1H3	3-[(4-methoxyphenyl)amino]-1,2-diphenylprop-2-en-1-one	COC1=CC=C(C=C1)NC=C(C2=CC=CC=C2)C(=O)C3=CC=CC=C3	5500	4543044;2751192	COCONUT:(CNP0182225);PUBCHEM:(4543044 2751192)	2097154	330149	482	8032	741698577763234365	735853496952562342	4243
1	1	0.371	0.371	-152562		0.998	24751	C15H13NO	[M + H]+	C15H14NO+	UFLSRBOSXIURIY	InChI=1S/C15H13NO/c17-13-7-5-11(6-8-13)9-12-10-16-15-4-2-1-3-14(12)15/h1-8,10,16-17H,9H2	4-[(1H-Indol-3-yl)methyl]phenol	C1=CC=C2C(=C1)C(=CN2)CC3=CC=C(C=C3)O	3552	54350606	MESH:(54350606);PUBCHEM:(54350606);PUBMED	70	224107	482	8035	738511555042594265	735853402056430712	4251
1	1	0.045	0.045	-261200		1000	43192	C22H37NO3	[M + H]+	C22H38NO3+	NXQPLWMLYJICBR	InChI=1S/C22H37NO3/c1-2-3-4-5-6-7-8-9-10-11-12-13-22(26)23-18-21(25)19-14-16-20(24)17-15-19/h14-17,21,24-25H,2-13,18H2,1H3,(H,23,26)	N-[2-hydroxy-2-(4-hydroxyphenyl)ethyl]tetradecanamide	CCCCCCCCCCCCCC(=O)NCC(C1=CC=C(C=C1)O)O	6300	71451219	PUBCHEM:(71451219);PUBMED	66	364285	484	8073	742885994428754990	735853522193884980	4294
1	7	0.324	0.324	-234210		0.031	7495	C14H12ClN5O	[M + H]+	C14H13ClN5O+	VIOLTJJTQCXMOC	InChI=1S/C14H12ClN5O/c1-8-6-9(2)20-13(16-8)12(14(21)19-20)18-17-11-5-3-4-10(15)7-11/h3-7H,1-2H3,(H,19,21)	3-(3-chlorophenyl)azo-5,7-dimethyl-1H-pyrazolo[1,5-a]pyrimidin-2-one	CC1=CC(=NC2=C(C(=O)NN12)N=NC3=CC(=CC=C3)Cl)C	2700	7313808	CHEBI:(121398);PUBCHEM:(7313808);PUBMED	98	302080	486	8095	742877739828756952	735853474496257691	4306
1	1	0.158	0.158	-273444		0.992	44976	C33H28N2O4	[M + H]+	C33H29N2O4+	ANTWUNPFIWHWNQ	InChI=1S/C33H28N2O4/c1-20-14-16-21(17-15-20)31-27(26-12-6-7-13-29(26)34-31)18-30(32(36)37)35-33(38)39-19-28-24-10-4-2-8-22(24)23-9-3-5-11-25(23)28/h2-17,28,30,34H,18-19H2,1H3,(H,35,38)(H,36,37)	(2S)-2-(9H-fluoren-9-ylmethoxycarbonylamino)-3-[2-(4-methylphenyl)-1H-indol-3-yl]propanoic acid	CC1=CC=C(C=C1)C2=C(C3=CC=CC=C3N2)CC(C(=O)O)NC(=O)OCC4C5=CC=CC=C5C6=CC=CC=C46	6800	102436902;72190090	PUBCHEM:(102436902 72190090)	2	517212	488	8138	739204303321539715	735853603164927530	4380
1	1	0.105	0.105	-182488		0.611	19222	C26H19NO5	[M + H]+	C26H20NO5+	HEYGLPMGONXPGI	InChI=1S/C26H19NO5/c1-2-30-19-10-7-16(8-11-19)24-15-21(28)20-14-18(9-12-23(20)32-24)27-26(29)25-13-17-5-3-4-6-22(17)31-25/h3-15H,2H2,1H3,(H,27,29)	N-[2-(4-ethoxyphenyl)-4-oxochromen-6-yl]-1-benzofuran-2-carboxamide	CCOC1=CC=C(C=C1)C2=CC(=O)C3=C(O2)C=CC(=C3)NC(=O)C4=CC5=CC=CC=C5O4	5100	93730099	PUBCHEM:(93730099)	2	426134	489	8157	742829685319743229	735853564531191491	4436
1	1	0.103	0.084	-157472		0.966	16293	C26H19NO5	[M + Na]+	C26H19NNaO5+	XCUMJBNSUKDBAE	InChI=1S/C26H19NO5/c1-2-30-22-10-6-4-8-19(22)24-15-20(28)18-12-11-17(14-23(18)32-24)27-26(29)25-13-16-7-3-5-9-21(16)31-25/h3-15H,2H2,1H3,(H,27,29)	N-[2-(2-ethoxyphenyl)-4-oxochromen-7-yl]-1-benzofuran-2-carboxamide	CCOC1=CC=CC=C1C2=CC(=O)C3=C(O2)C=C(C=C3)NC(=O)C4=CC5=CC=CC=C5O4	5100	98476540	PUBCHEM:(98476540)	2	448116	491	8179	742822444109735261	735853574958231745	4439
1	1	0.005	0.005	-384857		0.983	50319	C28H38N4O12	[M + H]+	C28H39N4O12+	RAMWERBGOCQINX	InChI=1S/C28H38N4O12/c1-27(2,3)43-25(35)29-21(15-41-19-11-7-9-17(13-19)31(37)38)23(33)24(34)22(30-26(36)44-28(4,5)6)16-42-20-12-8-10-18(14-20)32(39)40/h7-14,21-24,33-34H,15-16H2,1-6H3,(H,29,35)(H,30,36)	tert-butyl N-[(2S,3R,4R,5S)-3,4-dihydroxy-5-[(2-methylpropan-2-yl)oxycarbonylamino]-1,6-bis(3-nitrophenoxy)hexan-2-yl]carbamate	CC(C)(C)OC(=O)NC(COC1=CC=CC(=C1)[N+](=O)[O-])C(C(C(COC2=CC=CC(=C2)[N+](=O)[O-])NC(=O)OC(C)(C)C)O)O	3500	10675380	PUBCHEM:(10675380)	2	623254	495	8248	740999783268582965	735853640901082254	4505
1	1	0.019	0.019	-481823		0.997	33339	C15H19Cl2N3O4	[M + H]+	C15H20Cl2N3O4+	KJFBVJALEQWJBS	InChI=1S/C15H19Cl2N3O4/c1-6(2)18-15-19-9-3-7(16)8(17)4-10(9)20(15)14-13(23)12(22)11(5-21)24-14/h3-4,6,11-14,21-23H,5H2,1-2H3,(H,18,19)	2-{5,6-dichloro-2-[(propan-2-yl)amino]-1H-1,3-benzodiazol-1-yl}-5-(hydroxymethyl)oxolane-3,4-diol	CC(C)NC1=NC2=CC(=C(C=C2N1C3C(C(C(O3)CO)O)O)Cl)Cl	2200	6915773;155933027;53997578;6338443;126539965;70835676;70957762;70957811;70957812;70957821;70957825;10199513;69247780;507258;18402072;70023465;70150231;59585123;10690915;10738270;122872;470055;470056;471161;475808;493367;46875455;11740224;57035090;44461287	PUBCHEMANNOTATIONBIO;COCONUT:(CNP0074371);NORMAN:(NS00069338);PUBCHEMANNOTATIONSAFETYANDTOXIC;BloodExposome:(471161);SUPERNATURAL:(SN0187124);MESH:(471161);PUBCHEM:(6915773 155933027 53997578 6338443 126539965 70835676 70957762 70957811 70957812 70957821 70957825 10199513 69247780 507258 18402072 70023465 70150231 59585123 10690915 10738270 122872 470055 470056 471161 475808 493367 46875455 11740…	137563996230	376083	496	8259	739267766370685954	735853530670573704	4527
1	1	0.058	0.058	-342136		1000	81875	C18H26N4O4S	[M + H]+	C18H27N4O4S+	GSJOGQBKZUTYEP	InChI=1S/C18H26N4O4S/c1-27-9-14(23)21-6-5-12-15(21)18(26)22-8-11(7-13(22)17(25)20-12)19-16(24)10-3-2-4-10/h10-13,15H,2-9H2,1H3,(H,19,24)(H,20,25)	N-{4-[2-(methylsulfanyl)acetyl]-2,9-dioxo-1,4,8-triazatricyclo[8.3.0.0¬≥,‚Å∑]tridecan-12-yl}cyclobutanecarboxamide	CSCC(=O)N1CCC2C1C(=O)N3CC(CC3C(=O)N2)NC(=O)C4CCC4	-0.2	5011672;11865932	COCONUT:(CNP0210298);PUBCHEM:(5011672 11865932)	2097154	395175	496	8267	739268104758744510	735853542519483074	4533
1	1	0.202	0.202	-286206		0.508	42606	C24H23NO3	[M + H]+	C24H24NO3+	HKKQHKSIIQXQBK	InChI=1S/C24H23NO3/c1-27-21-12-8-19(9-13-21)23(20-10-14-22(28-2)15-11-20)16-24(26)25-17-18-6-4-3-5-7-18/h3-16H,17H2,1-2H3,(H,25,26)	N-Benzyl-3,3-bis(4-methoxyphenyl)acrylamide	COC1=CC=C(C=C1)C(=CC(=O)NCC2=CC=CC=C2)C3=CC=C(C=C3)OC	4900	3087666	PUBCHEMANNOTATIONSAFETYANDTOXIC;PUBCHEM:(3087666);DSSTox:(DTXSID30151115)	137506062338	374175	496	8271	739201502902198141	735853528363706454	4539
1	2	0.11	0.11	-239961		0.376	48237	C17H17NO2	[M + H]+	C17H18NO2+	MUSZSITXXJNLPD	InChI=1S/C17H17NO2/c1-2-16(12-3-7-14(19)8-4-12)17(11-18)13-5-9-15(20)10-6-13/h3-10,16-17,19-20H,2H2,1H3	(2S,3R)-2,3-bis(4-hydroxyphenyl)pentanenitrile	CCC(C1=CC=C(C=C1)O)C(C#N)C2=CC=C(C=C2)O	3700	92284473;92284684;10912494;101531;44355916	PUBCHEMANNOTATIONSAFETYANDTOXIC;PUBCHEM:(92284473 92284684 10912494 101531 44355916);DSSTox:(DTXSID90983550);PUBMED	137506062402	268133	496	8271	738892917903521576	735853449628228190	4546
1	1	0.009	0.009	-377683		0.965	33966	C17H22N6O4	[M + H]+	C17H23N6O4+	YYUDAYORISRAJI	InChI=1S/C17H22N6O4/c1-11(24)22-7-8-23(17(27)13-9-18-5-6-19-13)14(10-22)16(26)21-12-3-2-4-20-15(12)25/h5-6,9,12,14H,2-4,7-8,10H2,1H3,(H,20,25)(H,21,26)	4-acetyl-N-(2-oxopiperidin-3-yl)-1-(pyrazine-2-carbonyl)piperazine-2-carboxamide	CC(=O)N1CCN(C(C1)C(=O)NC2CCCNC2=O)C(=O)C3=NC=CN=C3	-1900	74509238;162807095;26763585	COCONUT:(CNP0044847);SUPERNATURAL:(SN0463929);PUBCHEM:(74509238 162807095 26763585)	3145730	375178	496	8273	738915311695246537	735853530125314159	4543
1	1	0.452	0.452	-212533		0.996	35422	C27H41NO2	[M + H]+	C27H42NO2+	RNIKMWFOVUSCPP	InChI=1S/C27H41NO2/c1-2-3-4-5-6-7-8-9-10-11-12-21-28(22-24-13-17-26(29)18-14-24)23-25-15-19-27(30)20-16-25/h13-20,29-30H,2-12,21-23H2,1H3	4-[[(4-Hydroxyphenyl)methyl-tridecylamino]methyl]phenol	CCCCCCCCCCCCCN(CC1=CC=C(C=C1)O)CC2=CC=C(C=C2)O	8700	160674319	PUBCHEM:(160674319)	2	412321	497	8281	742874234816674772	735853554624244958	4555
1	1	0.104	0.104	-241575		0.645	61812	C18H17NO2	[M + H]+	C18H18NO2+	RIRBXBVFZCKFNX	InChI=1S/C18H17NO2/c1-4-19-17-7-5-13(11(2)20)9-15(17)16-10-14(12(3)21)6-8-18(16)19/h5-10H,4H2,1-3H3	1,1'-(9-ethyl-9H-carbazole-3,6-diyl)diethanone	CCN1C2=C(C=C(C=C2)C(=O)C)C3=C1C=CC(=C3)C(=O)C	3000	622083	PUBCHEMANNOTATIONSAFETYANDTOXIC;PUBCHEM:(622083);DSSTox:(DTXSID60347488);PUBMED	137506062402	280133	501	8348	739267379085431336	735853457396079553	4662
1	3	0.034	0.034	-308946		0.024	4408	C24H19FN2O4	[M + Na]+	C24H19FN2NaO4+	WOVSHPHGRSVQLW	InChI=1S/C24H19FN2O4/c1-31-19-8-7-17(13-18(19)25)22(28)20-21(16-5-3-2-4-6-16)27(24(30)23(20)29)14-15-9-11-26-12-10-15/h2-13,21,28H,14H2,1H3	(5R)-4-[(3-fluoro-4-methoxyphenyl)-hydroxymethylidene]-5-phenyl-1-(pyridin-4-ylmethyl)pyrrolidine-2,3-dione	COC1=C(C=C(C=C1)C(=C2C(N(C(=O)C2=O)CC3=CC=NC=C3)C4=CC=CC=C4)O)F	3500	16428911;5904156;27300909;27300911;3721163	PUBCHEMANNOTATIONSAFETYANDTOXIC:(null);PUBCHEM:(16428911 5904156 27300909 27300911 3721163)	67108866	441121	502	8360	742742502537745857	735853570336108527	4679
1	1	0.524	0.524	-75369		0.947	13709	C16H10N2O2	[M + H]+	C16H11N2O2+	JNLNPCNGMHKCKO	InChI=1S/C16H10N2O2/c19-15-10-6-2-4-8-12(10)17-14(15)13-9-5-1-3-7-11(9)18-16(13)20/h1-8,18,20H	Indirubin	C1=CC=C2C(=C1)C(=C(N2)O)C3=NC4=CC=CC=C4C3=O	2700	154731494;154731495;10177	PUBCHEMANNOTATIONBIO;HMDB:(HMDB0240743);PUBCHEMANNOTATIONSAFETYANDTOXIC;BloodExposome:(10177);SUPERNATURAL:(SN0053399 SN0170156);MESH:(10177);PUBCHEM:(154731494 154731495 10177);GNPS:(CCMSLIB00000079110);COCONUT:(CNP0177535 CNP0349190);NORMAN:(NS00011738 NS00101121);CHEBI:(92322 183083);DSSTox:(DTXSID201026053 DTXSID501026052);LOTUS:(Q104968482 Q104389757 Q27164070 Q1661452);PUBCHEMANNOTATIONDRUG…	137832435838	263081	508	8472	742880598104329065	735853444326627774	4814
1	4	0.18	0.18	-172322		0.106	6186	C26H17NO5	[M + Na]+	C26H17NNaO5+	GIERQYKZWFLVGR	InChI=1S/C26H17NO5/c27-15-5-8-17(9-6-15)31-18-10-12-22-24(14-18)32-23-13-16(28)7-11-21(23)25(22)19-3-1-2-4-20(19)26(29)30/h1-14H,27H2,(H,29,30)	2-(6-(4-Aminophenoxy)-3-oxo-3H-xanthen-9-yl)benzoic acid	C1=CC=C(C(=C1)C2=C3C=CC(=O)C=C3OC4=C2C=CC(=C4)OC5=CC=C(C=C5)N)C(=O)O	3600	102009814;11640420	PUBCHEM:(102009814 11640420);DSSTox:(DTXSID40469879);PUBCHEMANNOTATIONDRUG;PUBMED	137472507970	446100	514	8566	742880104908703284	735853573813186688	4908
1	2	0.337	0.337	-195359		0.385	31882	C24H36N10O9	[M + H]+	C24H37N10O9+	GXVMELBMAAWOIE	InChI=1S/C24H36N10O9/c35-22(29(32(38)39)16-4-1-5-16)25-13-10-20-27(24(37)31(34(42)43)18-8-3-9-18)15-12-21-26(14-11-19(25)28(20)21)23(36)30(33(40)41)17-6-2-7-17/h16-21H,1-15H2	2-N,6-N,10-N-tri(cyclobutyl)-2-N,6-N,10-N-trinitro-2,6,10,13-tetrazatricyclo[7.3.1.05,13]tridecane-2,6,10-tricarboxamide	C1CC(C1)N(C(=O)N2CCC3N(CCC4N3C2CCN4C(=O)N(C5CCC5)[N+](=O)[O-])C(=O)N(C6CCC6)[N+](=O)[O-])[N+](=O)[O-]	2900	154391520	PUBCHEM:(154391520)	2	609275	520	8668	738881615789355478	735853635209411486	5099
1	8	0.729	0.729	-249661		0.01	14019	C21H21NO6	[M + K]+	C21H21KNO6+	NIWDLVRLOCHGOV	InChI=1S/C21H21NO6/c23-20(15-9-5-2-6-10-15)27-16-12-25-19-17(13-26-18(16)19)28-21(24)22-11-14-7-3-1-4-8-14/h1-10,16-19H,11-13H2,(H,22,24)	Isosorbide-2-(benzylcarbamate)-5-benzoate	C1C(C2C(O1)C(CO2)OC(=O)NCC3=CC=CC=C3)OC(=O)C4=CC=CC=C4	2500	25129141	PUBCHEMANNOTATIONBIO;PUBCHEM:(25129141);PUBMED	16777282	422102	520	8671	742743690633074636	735853562408873582	5088
1	1	0.246	0.246	-122923		0.533	16096	C26H15NO5	[M + Na]+	C26H15NNaO5+	BDJPMDHPFRCTRK	InChI=1S/C26H15NO5/c28-24-16-11-5-7-13-18(16)31-25(29)21(24)20-19-15-10-4-6-12-17(15)32-26(30)23(19)27-22(20)14-8-2-1-3-9-14/h1-13,27-28H	1-(2-Oxo-4-hydroxy-2H-1-benzopyran-3-yl)-2-phenyl[1]benzopyrano[3,4-b]pyrrole-4(3H)-one	C1=CC=C(C=C1)C2=C(C3=C(N2)C(=O)OC4=CC=CC=C43)C5=C(C6=CC=CC=C6OC5=O)O	4800	132570747	PUBCHEM:(132570747)	2	444084	520	8671	738549170521369981	735853573163069538	5089
1	3	0.022	0.022	-160504		0.001	49291	C14H18O6	[M + Na]+	C14H18NaO6+	HSZUHSXXAOWGQY	InChI=1S/C14H18O6/c1-5-11(15)18-8-14(4,9-19-12(16)6-2)10-20-13(17)7-3/h5-7H,1-3,8-10H2,4H3	1,1,1-Trimethylol ethane triacrylate	CC(COC(=O)C=C)(COC(=O)C=C)COC(=O)C=C	2300	88240	NORMAN:(NS00026426);BloodExposome:(88240);PUBCHEM:(88240);DSSTox:(DTXSID6066527);PUBMED	137443409986	305100	524	8741	739269024246650866	735853476845068041	5257
1	1	0.135	0.135	-236136		0.973	37770	C25H18N2O3	[M + H]+	C25H19N2O3+	OZFYUTLSPUDXNO	InChI=1S/C25H18N2O3/c1-27-15-20(19-12-5-6-13-21(19)27)23-22(24(28)26-25(23)29)16-8-7-11-18(14-16)30-17-9-3-2-4-10-17/h2-15H,1H3,(H,26,28,29)		CN1C=C(C2=CC=CC=C21)C3=C(C(=O)NC3=O)C4=CC(=CC=C4)OC5=CC=CC=C5	4200	5327710	PUBCHEMANNOTATIONBIO;PUBCHEM:(5327710);PUBMED	16777282	395138	530	8831	742858306313884429	735853542423014077	5389
1	1	0.051	0.051	-159550		0.962	10657	C27H14N2O3	[M + H]+	C27H15N2O3+	KSGWEZGRPUHFLF	InChI=1S/C27H14N2O3/c30-25-20-13-15(16-9-11-18-17-5-2-4-8-23(17)32-24(18)14-16)10-12-22(20)29-26(25)28-21-7-3-1-6-19(21)27(29)31/h1-14H	8-Dibenzofuran-3-ylindolo[2,1-b]quinazoline-6,12-dione	C1=CC=C2C(=C1)C(=O)N3C4=C(C=C(C=C4)C5=CC6=C(C=C5)C7=CC=CC=C7O6)C(=O)C3=N2	5400	163394865	PUBCHEM:(163394865)	2	415107	533	8885	742827364636504391	735853556054502692	5486
1	2	0.003	0.003	-564963		0.01	11028	C14H23N5O8	[M + Na]+	C14H23N5NaO8+	QYKBTDOAMKORGL	InChI=1S/C14H23N5O8/c15-6(1-3-9(16)20)12(24)18-7(2-4-10(17)21)13(25)19-8(14(26)27)5-11(22)23/h6-8H,1-5,15H2,(H2,16,20)(H2,17,21)(H,18,24)(H,19,25)(H,22,23)(H,26,27)	2-[[5-Amino-2-[(2,5-diamino-5-oxopentanoyl)amino]-5-oxopentanoyl]amino]butanedioic acid	C(CC(=O)N)C(C(=O)NC(CCC(=O)N)C(=O)NC(CC(=O)O)C(=O)O)N	-6700	145455033;18220622	CHEBI:(162066);PUBCHEM:(145455033 18220622)	34	412145	536	8941	742830232546393819	735853554397752532	5578
1	1	0.044	0.075	-293269		0.9	30799	C26H19NO4	[M + H]+	C26H20NO4+	KKZUJSRWGQBCMI	InChI=1S/C26H19NO4/c1-26-18-8-4-2-6-16(18)20(17-7-3-5-9-19(17)26)21-22(26)24(29)27(23(21)28)15-12-10-14(11-13-15)25(30)31/h2-13,20-22H,1H3,(H,30,31)		CC12C3C(C(C4=CC=CC=C41)C5=CC=CC=C25)C(=O)N(C3=O)C6=CC=C(C=C6)C(=O)O	3800	7039992;7039993;7039994;7039995;7039996;7039997;7039998;7039999;3127140;131841688	COCONUT:(CNP0453380);SUPERNATURAL:(SN0188487);PUBCHEM:(7039992 7039993 7039994 7039995 7039996 7039997 7039998 7039999 3127140 131841688)	3145730	410138	537	8942	742835320052604208	735853553491782823	5581
1	1	0.279	0.279	-264620		0.944	18376	C26H19NO4	[M + Na]+	C26H19NNaO4+	RGOSHVJUFBNBCN	InChI=1S/C26H19NO4/c28-23-17-8-4-5-9-18(17)24(29)26-22(23)19-10-11-21-20(25(19)31-26)14-27(15-30-21)13-12-16-6-2-1-3-7-16/h1-11H,12-15H2		C1C2=C(C=CC3=C2OC4=C3C(=O)C5=CC=CC=C5C4=O)OCN1CCC6=CC=CC=C6	5200	2100704;2100705	SUPERNATURAL:(SN0324790);PUBCHEM:(2100704 2100705)	1048578	432120	537	8943	742859835666175973	735853566997442373	5580
1	3	0.029	0.029	-369060		0.008	23570	C22H22FN5O2	[M + Na]+	C22H22FN5NaO2+	MCZCAWWHZGEUFE	InChI=1S/C22H22FN5O2/c23-20-9-15(6-7-25-20)16-8-19-22(30)26-12-17(28(19)13-16)10-21(29)27-18(11-24)14-4-2-1-3-5-14/h1-9,13,17-18H,10-12,24H2,(H,26,30)(H,27,29)	[(2S)-2-[[2-[(4S)-7-(2-fluoropyridin-4-yl)-1-oxo-3,4-dihydro-2H-pyrrolo[1,2-a]pyrazin-4-yl]acetyl]amino]-2-phenylethyl]azanium	C1C(N2C=C(C=C2C(=O)N1)C3=CC(=NC=C3)F)CC(=O)NC(CN)C4=CC=CC=C4	0.8	78225320;72696912;72696914	PUBCHEMANNOTATIONBIO;PUBCHEM:(78225320 72696912 72696914);PUBMED	16777282	430165	544	9060	742885127419979221	735853566296993570	5713
1	2	0.242	0.242	-201323		0.411	39209	C26H19NO3	[M + H]+	C26H20NO3+	YBLBHSSRHHJKEK	InChI=1S/C26H19NO3/c28-21-14-10-18(11-15-21)26(19-12-16-22(29)17-13-19)24-9-5-4-8-23(24)25(30)27(26)20-6-2-1-3-7-20/h1-17,28-29H	Phenolphthalein anilide	C1=CC=C(C=C1)N2C(=O)C3=CC=CC=C3C2(C4=CC=C(C=C4)O)C5=CC=C(C=C5)O	5000	2832097	NORMAN:(NS00077823);PUBCHEMANNOTATIONSAFETYANDTOXIC;PUBCHEM:(2832097);DSSTox:(DTXSID701019794)	137506324482	394144	551	9186	742792702165842200	735853541407992459	5903
1	2	0.021	0.021	-491027		0.068	33545	C20H27N7O7	[M + Na]+	C20H27N7NaO7+	QOMMXEJYGGOXHJ	InChI=1S/C20H27N7O7/c21-20-25-16-15(18(32)26-20)27(9-28)12(8-23-16)7-22-11-3-1-10(2-4-11)17(31)24-13(19(33)34)5-6-14(29)30/h1-4,9,12-13,15-16,20,22-23,25H,5-8,21H2,(H,24,31)(H,26,32)(H,29,30)(H,33,34)	(2S)-2-[[4-[[(4aR,6S,8aR)-2-amino-5-formyl-4-oxo-1,2,3,4a,6,7,8,8a-octahydropteridin-6-yl]methylamino]benzoyl]amino]pentanedioic acid	C1C(N(C2C(N1)NC(NC2=O)N)C=O)CNC3=CC=C(C=C3)C(=O)NC(CCC(=O)O)C(=O)O	-6800	445359	PUBCHEMANNOTATIONBIO;PUBCHEM:(445359)	16777218	500185	551	9187	738917621418768648	735853598177899824	5901
1	1	0.158	0.158	-103676		1000	52789	C17H12O2	[M + H]+	C17H13O2+	UWCKXOXEYVSRSD	InChI=1S/C17H12O2/c18-15-11-16(13-7-3-1-4-8-13)19-17(12-15)14-9-5-2-6-10-14/h1-12H	2,6-Diphenyl-4H-pyran-4-one	C1=CC=C(C=C1)C2=CC(=O)C=C(O2)C3=CC=CC=C3	3400	23263919;283227	PUBCHEMANNOTATIONSAFETYANDTOXIC;PUBCHEM:(23263919 283227);DSSTox:(DTXSID40300571)	137506062338	249091	552	9199	742828480694662200	735853428019173402	5914
1	3	0.162	0.162	-158583		0.013	48853	C22H17NO4	[M + K]+	C22H17KNO4+	YYYSUJCCFLWMSS	InChI=1S/C22H17NO4/c1-15(24)27-20-14-8-6-12-18(20)22(26)23-19-13-7-5-11-17(19)21(25)16-9-3-2-4-10-16/h2-14H,1H3,(H,23,26)	2-(Acetyloxy)-N-(2-benzoylphenyl)benzamide	CC(=O)OC1=CC=CC=C1C(=O)NC2=CC=CC=C2C(=O)C3=CC=CC=C3	4400	218725	PUBCHEMANNOTATIONSAFETYANDTOXIC;PUBCHEM:(218725);DSSTox:(DTXSID60961527)	137506062338	398078	558	9295	742870696749281083	735853545367415625	6051
1	1	0.062	0.062	-225048		0.637	13076	C24H17NO3	[M + H]+	C24H18NO3+	BVFVCDJTSNPOPW	InChI=1S/C24H17NO3/c26-23(25-20-13-11-18(12-14-20)24(27)28)19-10-9-17-7-4-8-21(22(17)15-19)16-5-2-1-3-6-16/h1-15H,(H,25,26)(H,27,28)	4-{[(8-Phenylnaphthalen-2-Yl)carbonyl]amino}benzoic Acid	C1=CC=C(C=C1)C2=CC=CC3=C2C=C(C=C3)C(=O)NC4=CC=C(C=C4)C(=O)O	5200	22404224	PUBCHEMANNOTATIONBIO;PUBCHEM:(22404224)	16777218	368128	580	9674	742832113570107358	735853524081321875	6635
1	3	0.055	0.055	-229299		0.008	22893	C22H16FN5O	[M + Na]+	C22H16FN5NaO+	NHOIYRIYXINORZ	InChI=1S/C22H16FN5O/c23-18-6-2-5-17-20(18)21(24)27-22(17,15-7-9-25-10-8-15)16-4-1-3-14(11-16)19-12-26-13-28(19)29/h1-13,29H,(H2,24,27)	7-Fluoro-3-[3-(3-hydroxyimidazol-4-yl)phenyl]-3-pyridin-4-ylisoindol-1-amine	C1=CC(=CC(=C1)C2(C3=C(C(=CC=C3)F)C(=N2)N)C4=CC=NC=C4)C5=CN=CN5O	2500	137656354	PUBCHEM:(137656354);PUBCHEMANNOTATIONDRUG;PUBMED	33554498	408123	583	9709	739266871566258274	735853552363514987	6680
1	2	0.018	0.018	-336908		0.001	60507	C10H14N2O6S	[M + H]+	C10H15N2O6S+	BPBAFZGGKPLCHG	InChI=1S/C10H14N2O6S/c1-18-6-2-5-11-19(16,17)8-3-4-10(13)9(7-8)12(14)15/h3-4,7,11,13H,2,5-6H2,1H3	4-Hydroxy-N-(3-methoxypropyl)-3-nitrobenzenesulphonamide	COCCCNS(=O)(=O)C1=CC(=C(C=C1)O)[N+](=O)[O-]	1100	3018879	NORMAN:(NS00061095);PUBCHEM:(3018879);DSSTox:(DTXSID801000770)	137439215618	291065	583	9712	742866275730564585	735853466560634153	6679

## Sheet: Table S9
Table S9 Genomes dataset
Assembly Accession	Assembly BioSample Isolation source	Organism Name	Current Accession	Organism Infraspecific Names Strain	Organism Infraspecific Names Isolate	Type Material Display Text	CheckM completeness	CheckM contamination
GCF_002797685.1	missing	Salinibacterium amurskyense	GCF_002797685.1	DSM 16400		assembly from type material	99.21	0.53
GCF_003668745.1	sea-water	Salinibacterium amurskyense	GCF_003668745.1	JCM 12362		assembly from type material	99.21	0.53
GCF_014652955.1		Salinibacterium amurskyense	GCF_014652955.1	KCTC 9931		assembly from type material	99.21	0.53
GCF_038154895.1	Tatoosh Island, WA, USA	Salinibacterium amurskyense	GCF_038154895.1	TI.3.15			99.35	1.05
GCF_003113315.1	feces	Salinibacterium hongtaonis	GCF_003113315.1	S1194			99.05	1.05
GCF_003065485.1		Salinibacterium hongtaonis	GCF_003065485.1	CGMCC 1.16371		assembly from type material	98.92	0.53
GCF_029211225.1	contaminated soil	Salinibacterium metalliresistens	GCF_029211225.1	H3M29-4		assembly from type material	99.17	0.53
GCF_026094475.1	tidal flat sediment	Salinibacterium sedimenticola	GCF_026094475.1	SYSU T00001		assembly from type material	99.05	0.96
GCF_030580675.1	mud	Salinibacterium soli	GCF_030580675.1	WY-16		assembly from type material	99.35
GCF_015234465.1	fecal sample from diarrhoea affected cattle A	Salinibacterium sp.	GCF_015234465.1		N14CT		98.78	0.7
GCF_031364185.1	stream sediment	Salinibacterium sp.	GCF_031364185.1		OTE_21_concoct_289		96.81	3.54
GCF_031368185.1	stream sediment	Salinibacterium sp.	GCF_031368185.1		OTE_38_concoct_36		95.92	1.1
GCF_015752305.1	missing	Salinibacterium sp. CAN_S4	GCF_015752305.1	CAN_S4			99.04
GCF_008001035.1		Salinibacterium sp. dk2585	GCF_008001035.1	dk2585			99.05	0.79
GCF_008017685.1	not collected	Salinibacterium sp. dk5596	GCF_008017685.1	dk5596			99.05	0.79
GCF_030063305.1	sediment	Salinibacterium sp. G-O1	GCF_030063305.1	G-O1			98.69	0.18
GCF_019443965.1	marine environment	Salinibacterium sp. M195	GCF_019443965.1	M195			99.08	0.26
GCF_015864925.1	sea water	Salinibacterium sp. NG22	GCF_015864925.1	NG22			99.21	1.05
GCF_015864945.1	sea water	Salinibacterium sp. NG253	GCF_015864945.1	NG253			99.21
GCF_015864955.1	sea water	Salinibacterium sp. NK8237	GCF_015864955.1	NK8237			99.21	0.13
GCF_015864905.1	sea water	Salinibacterium sp. NSLL150	GCF_015864905.1	NSLL150			99.21
GCF_015864875.1	sea water	Salinibacterium sp. NSLL16	GCF_015864875.1	NSLL16			99.21
GCF_015864935.1	sea water	Salinibacterium sp. NSLL17	GCF_015864935.1	NSLL17			99.21
GCF_015864865.1	sea water	Salinibacterium sp. NSLL35	GCF_015864865.1	NSLL35			99.21
GCF_000247645.1	soil	Salinibacterium sp. PAMC 21357	GCF_000247645.1	PAMC 21357			92.73	0.53
GCF_015864675.1	sea water	Salinibacterium sp. SWN1162	GCF_015864675.1	SWN1162			99.21	1.05
GCF_015864625.1	sea water	Salinibacterium sp. SWN139	GCF_015864625.1	SWN139			99.21	0.53
GCF_015864665.1	sea water	Salinibacterium sp. SWN167	GCF_015864665.1	SWN167			99.21
GCF_015864575.1	sea water	Salinibacterium sp. SWN248	GCF_015864575.1	SWN248			99.21
GCF_038397785.1	Middle part of the water column of temporary meltwater pond	Salinibacterium sp. TMP30	GCF_038397785.1	TMP30			99.08	0.58
GCF_004118935.1	cold room contaminant	Salinibacterium sp. UTAS2018	GCF_004118935.1	UTAS2018			99.21	0.53
GCF_011751885.2		Salinibacterium sp. ZJ450	GCF_011751885.2	ZJ450			98.74	0.13
GCF_011751895.1		Salinibacterium sp. ZJ454	GCF_011751895.1	ZJ454			98.84	0.13
GCF_011751865.2		Salinibacterium sp. ZJ70	GCF_011751865.2	ZJ70			99.11	0.53
GCF_011751905.1		Salinibacterium sp. ZJ77	GCF_011751905.1	ZJ77			99.11
GCF_900230175.1	missing	Salinibacterium xinjiangense	GCF_900230175.1	CGMCC 1.05381		assembly from type material	99.21
GCF_014645015.1	glacier frozen soil	Salinibacterium xinjiangense	GCF_014645015.1	CGMCC 1.5381		assembly from type material	98.69
GCF_963974405.1	marine metagenome	uncultured Salinibacterium sp.	GCF_963974405.1		ERR2762102_concoct_206		99.35	0.53
